# Supplementary material
Source: PubMed Central journal article supplement (PMC10872582)

# Full unedited blots for Figure 1

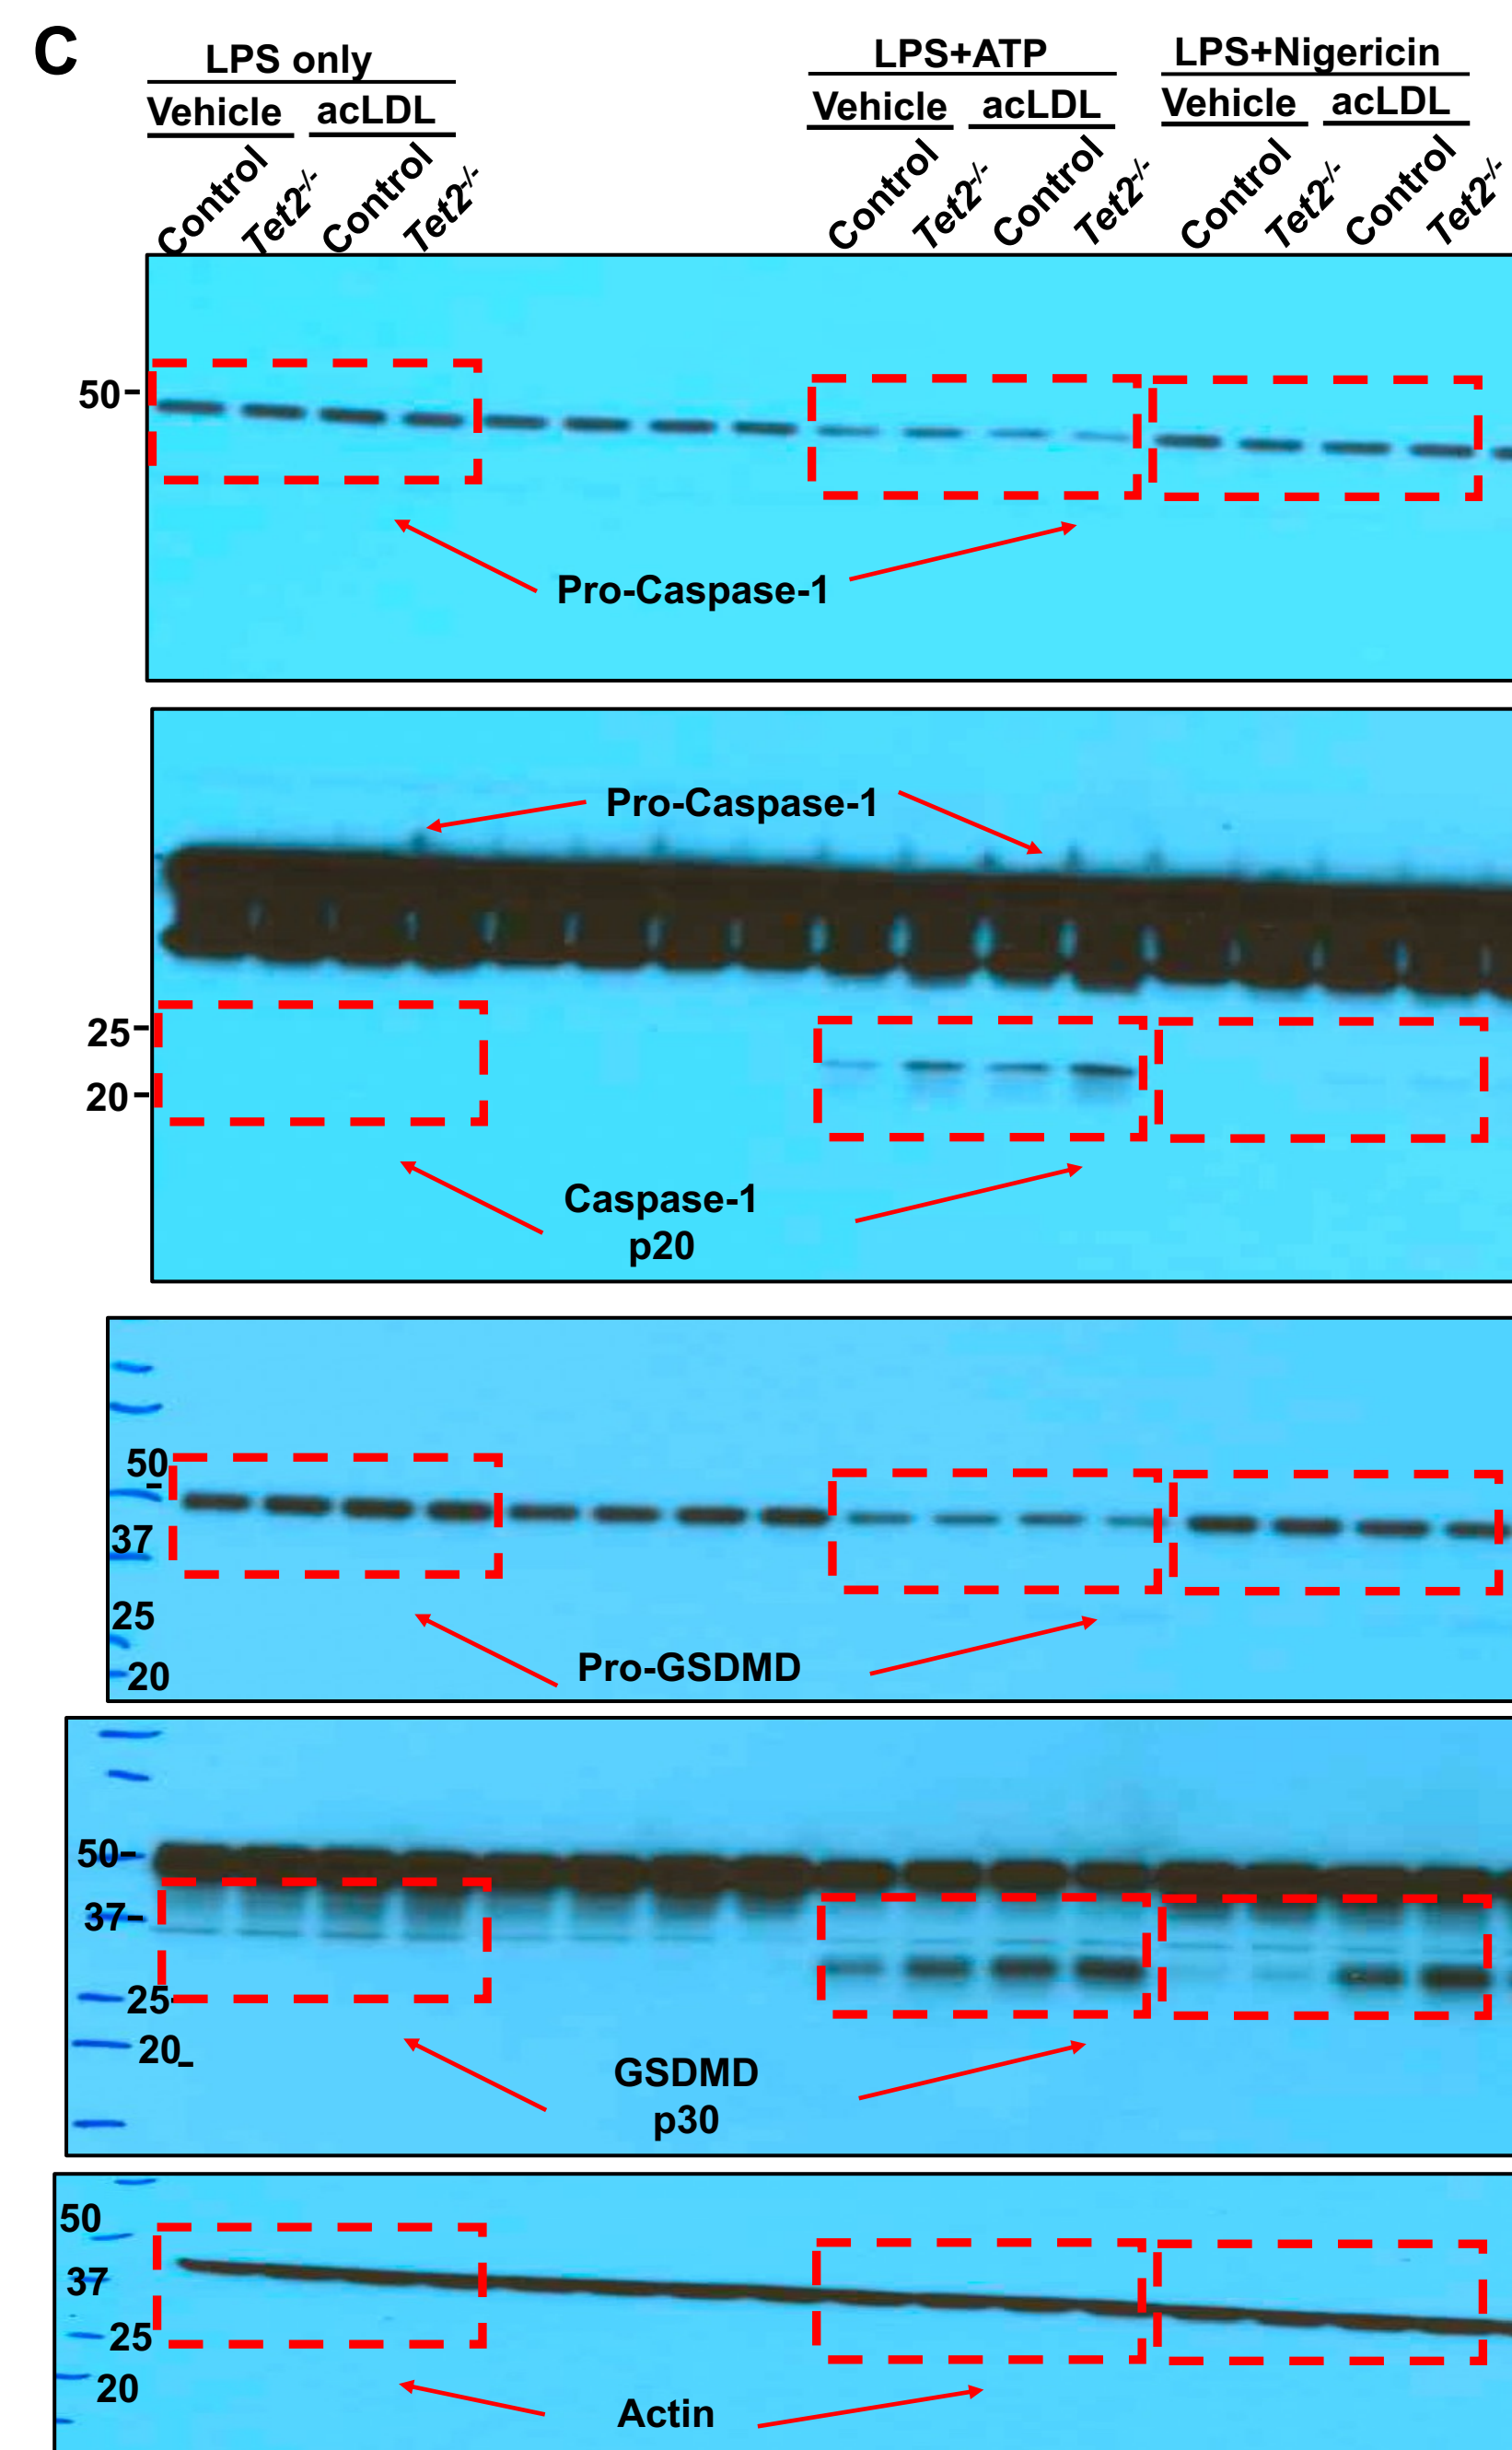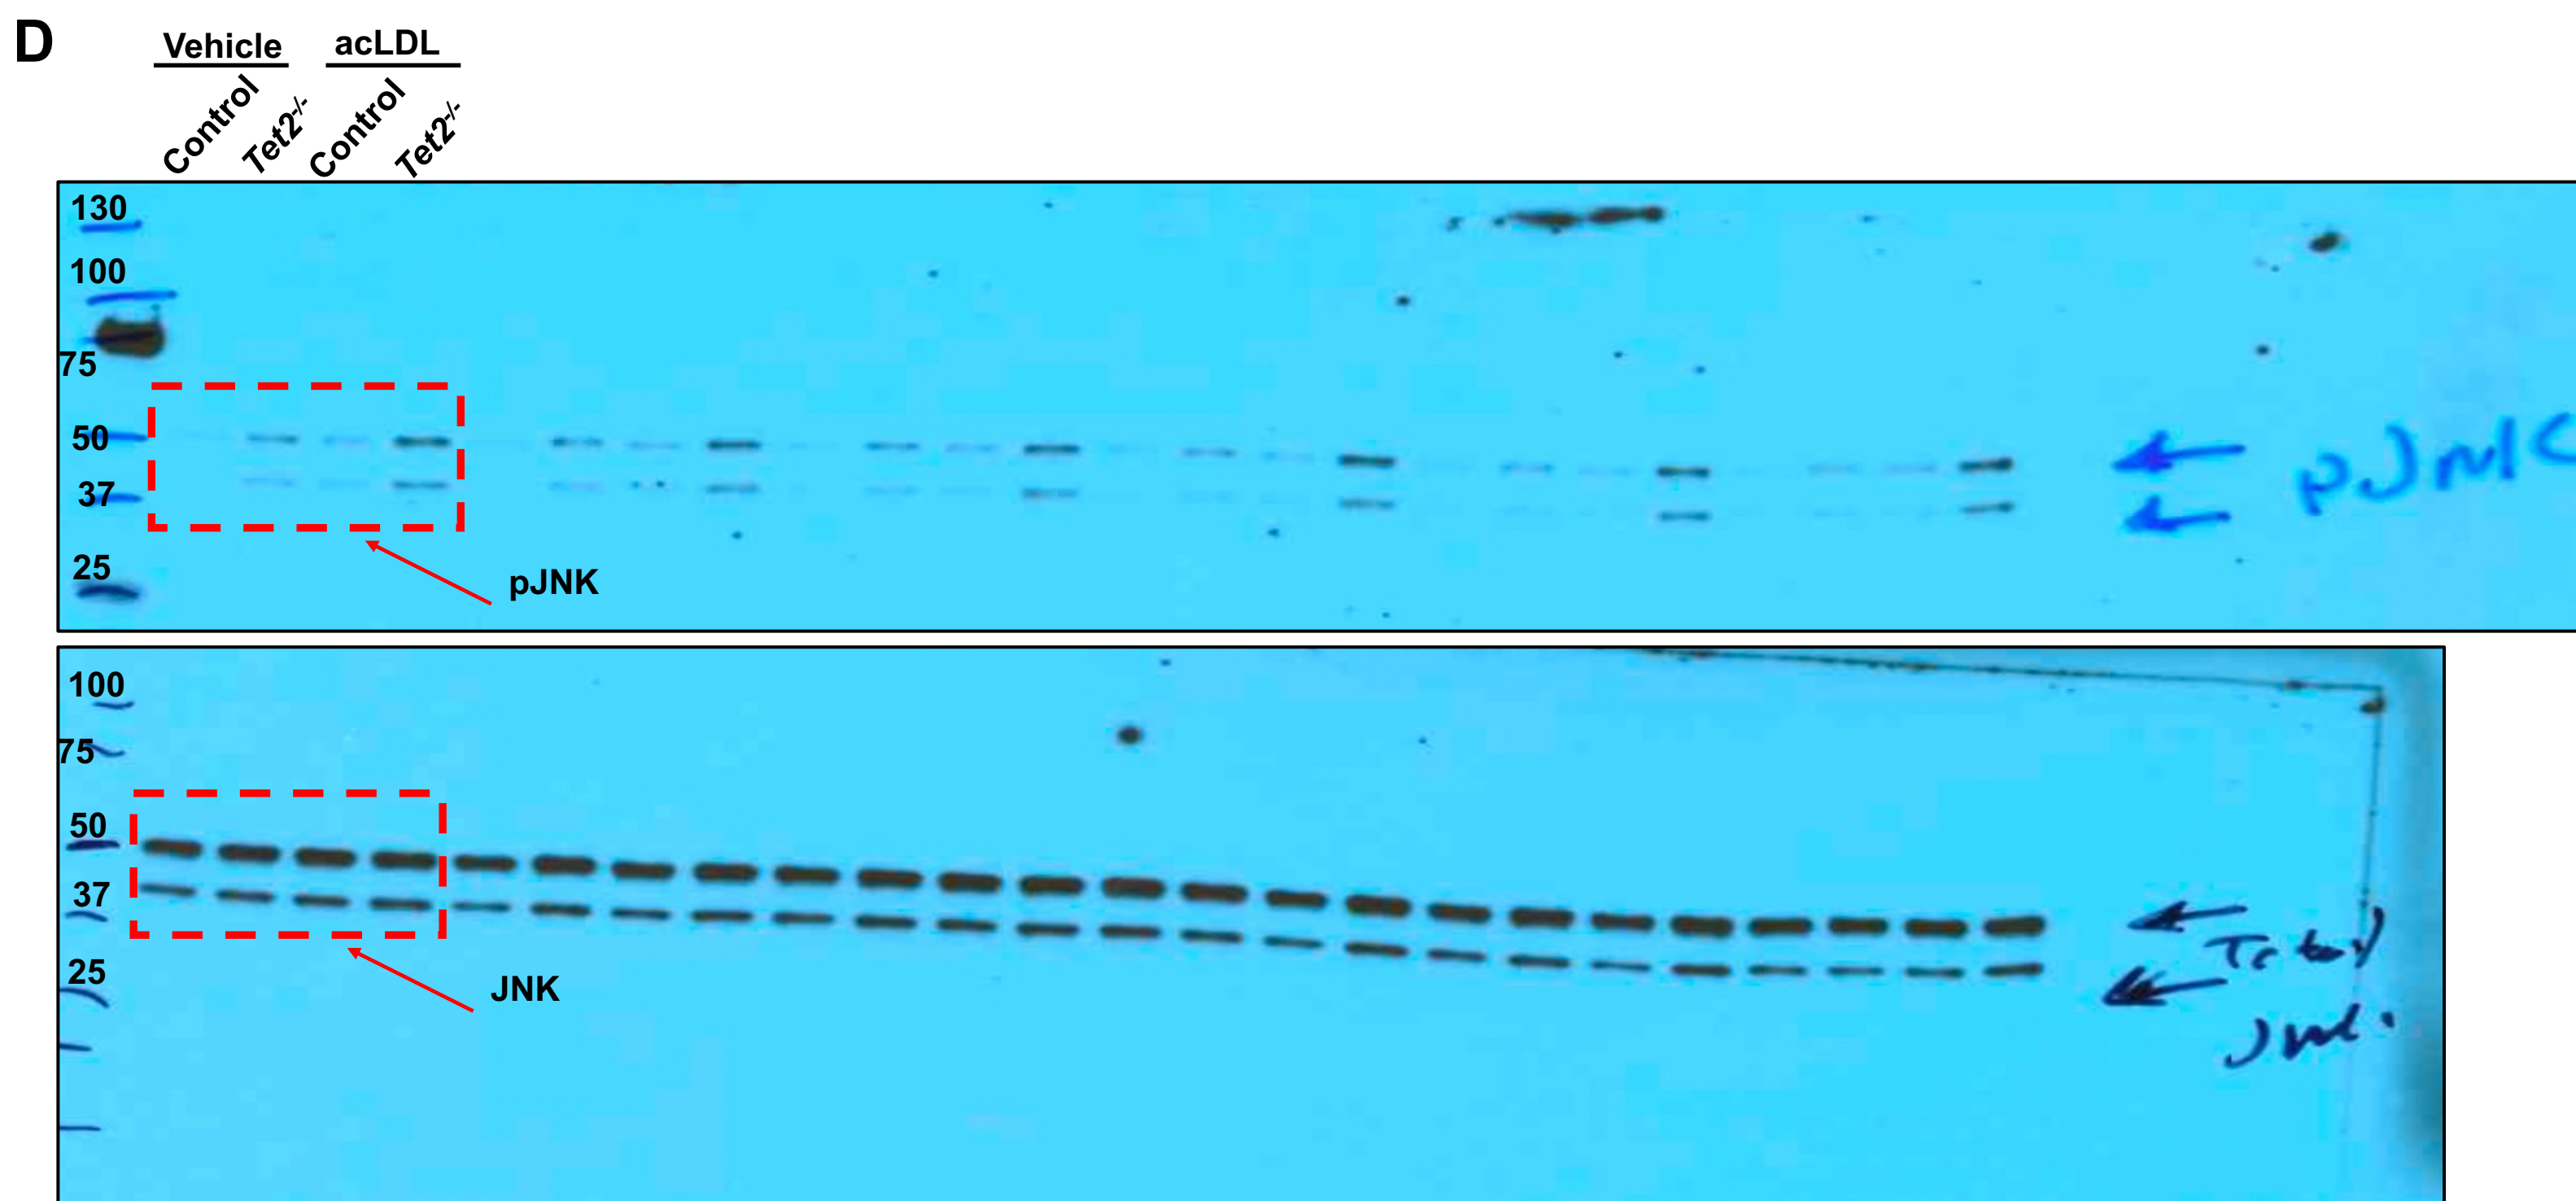

# Full unedited blots for Figure 1

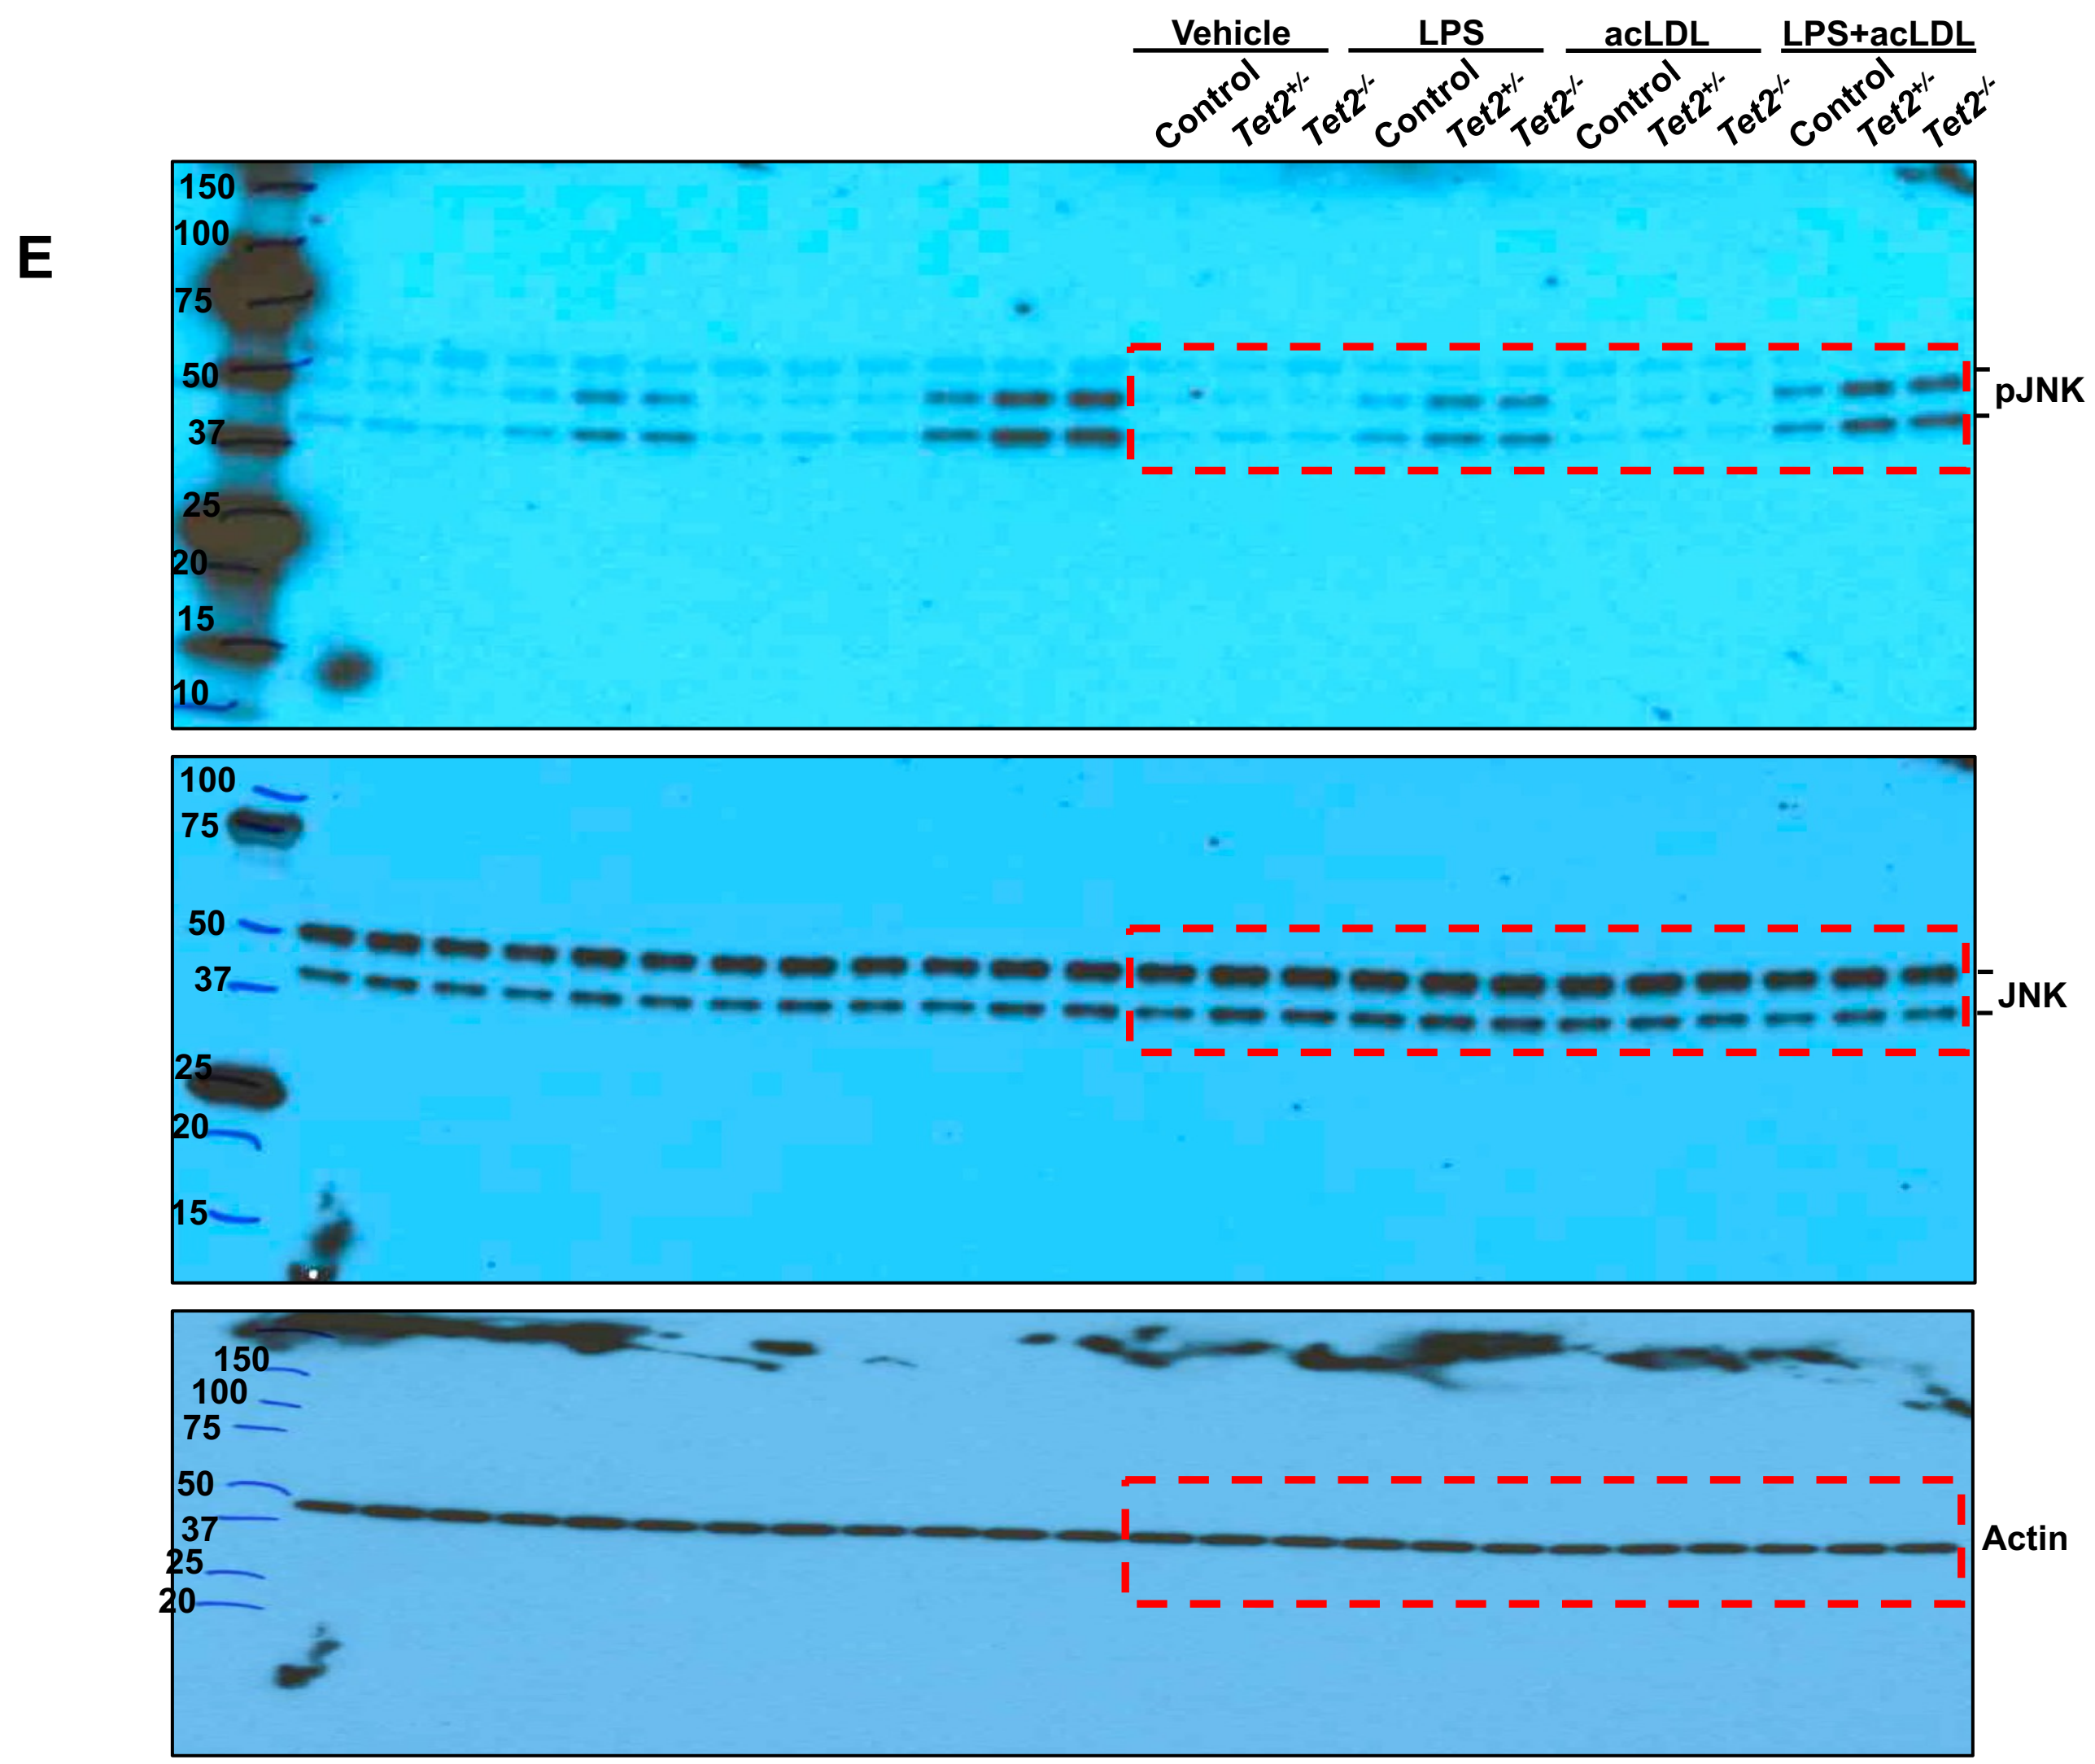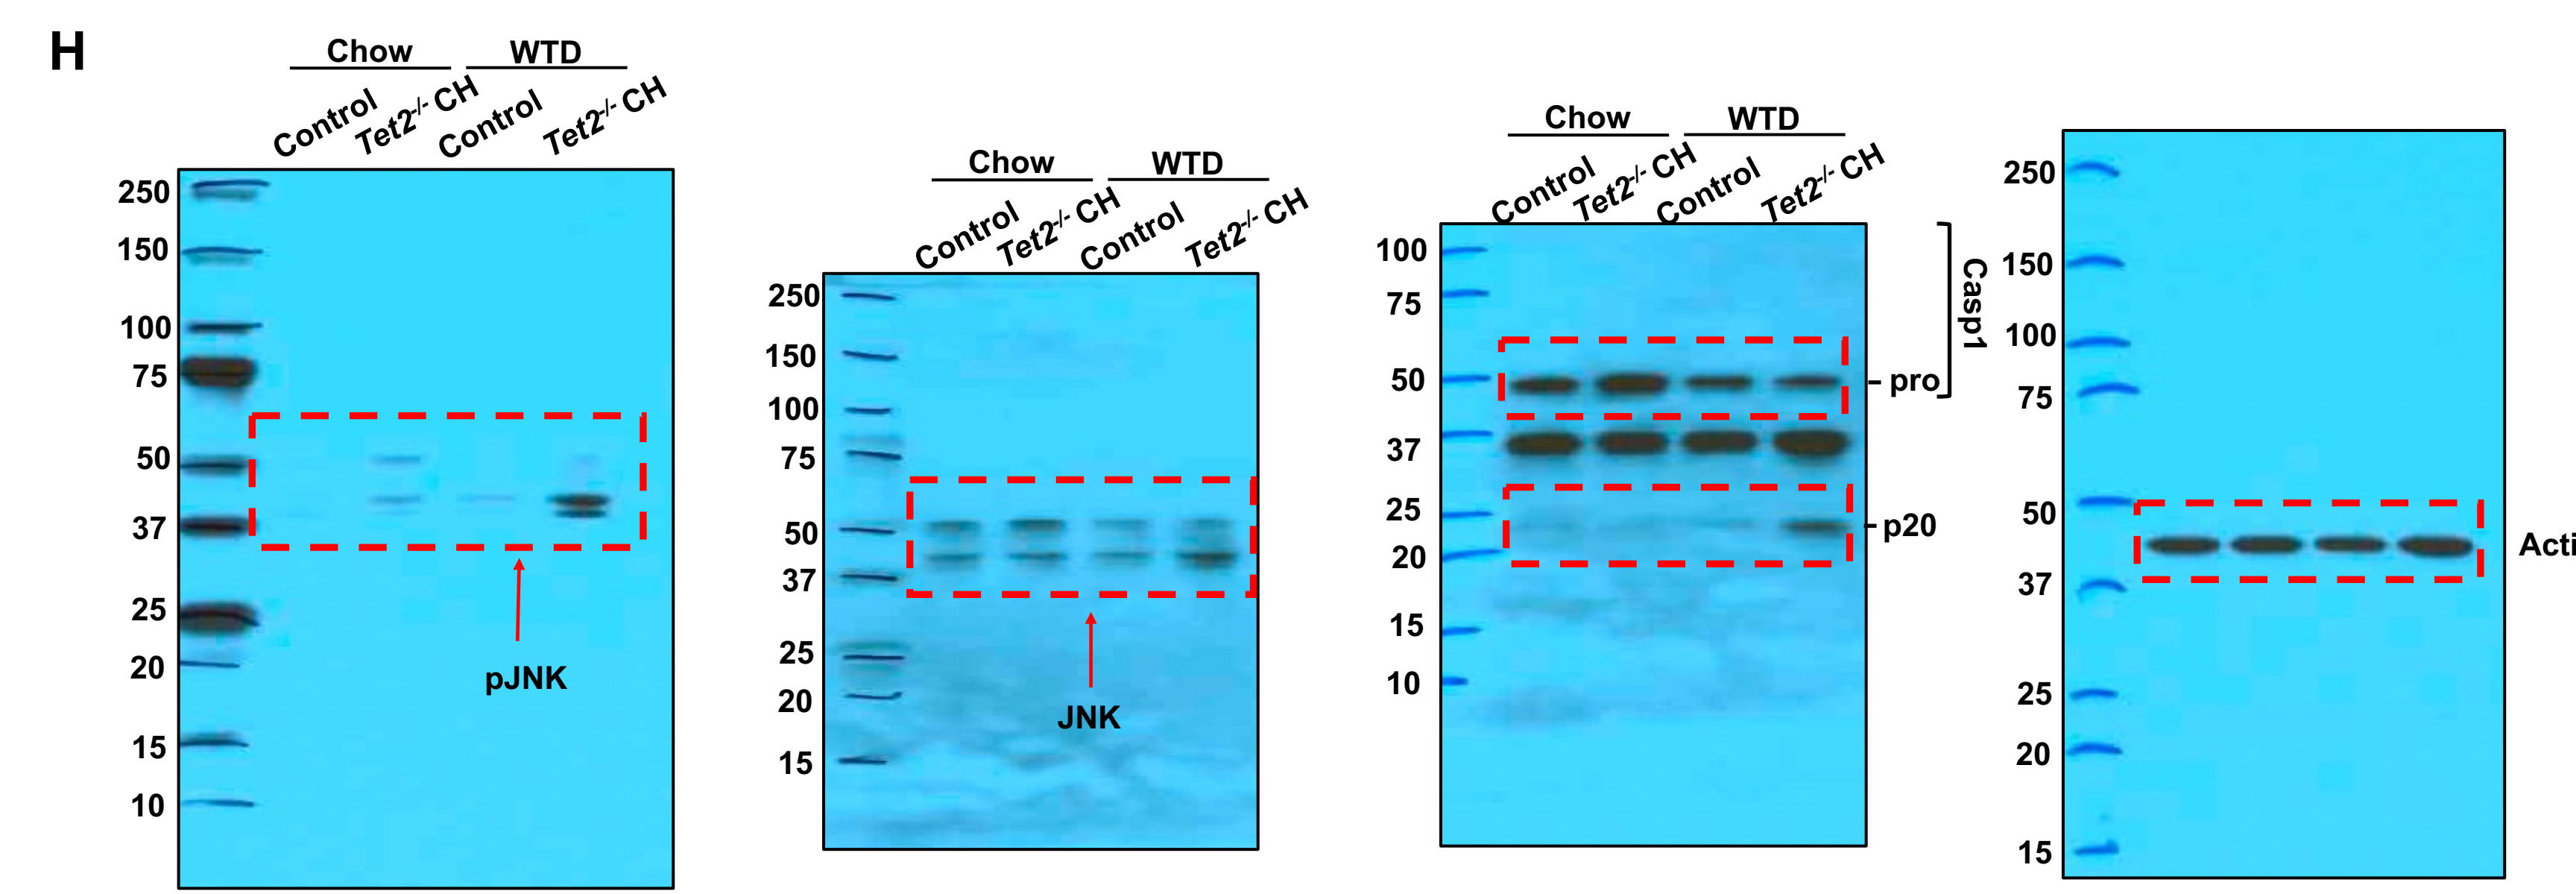

# Full unedited blots for Figure 1

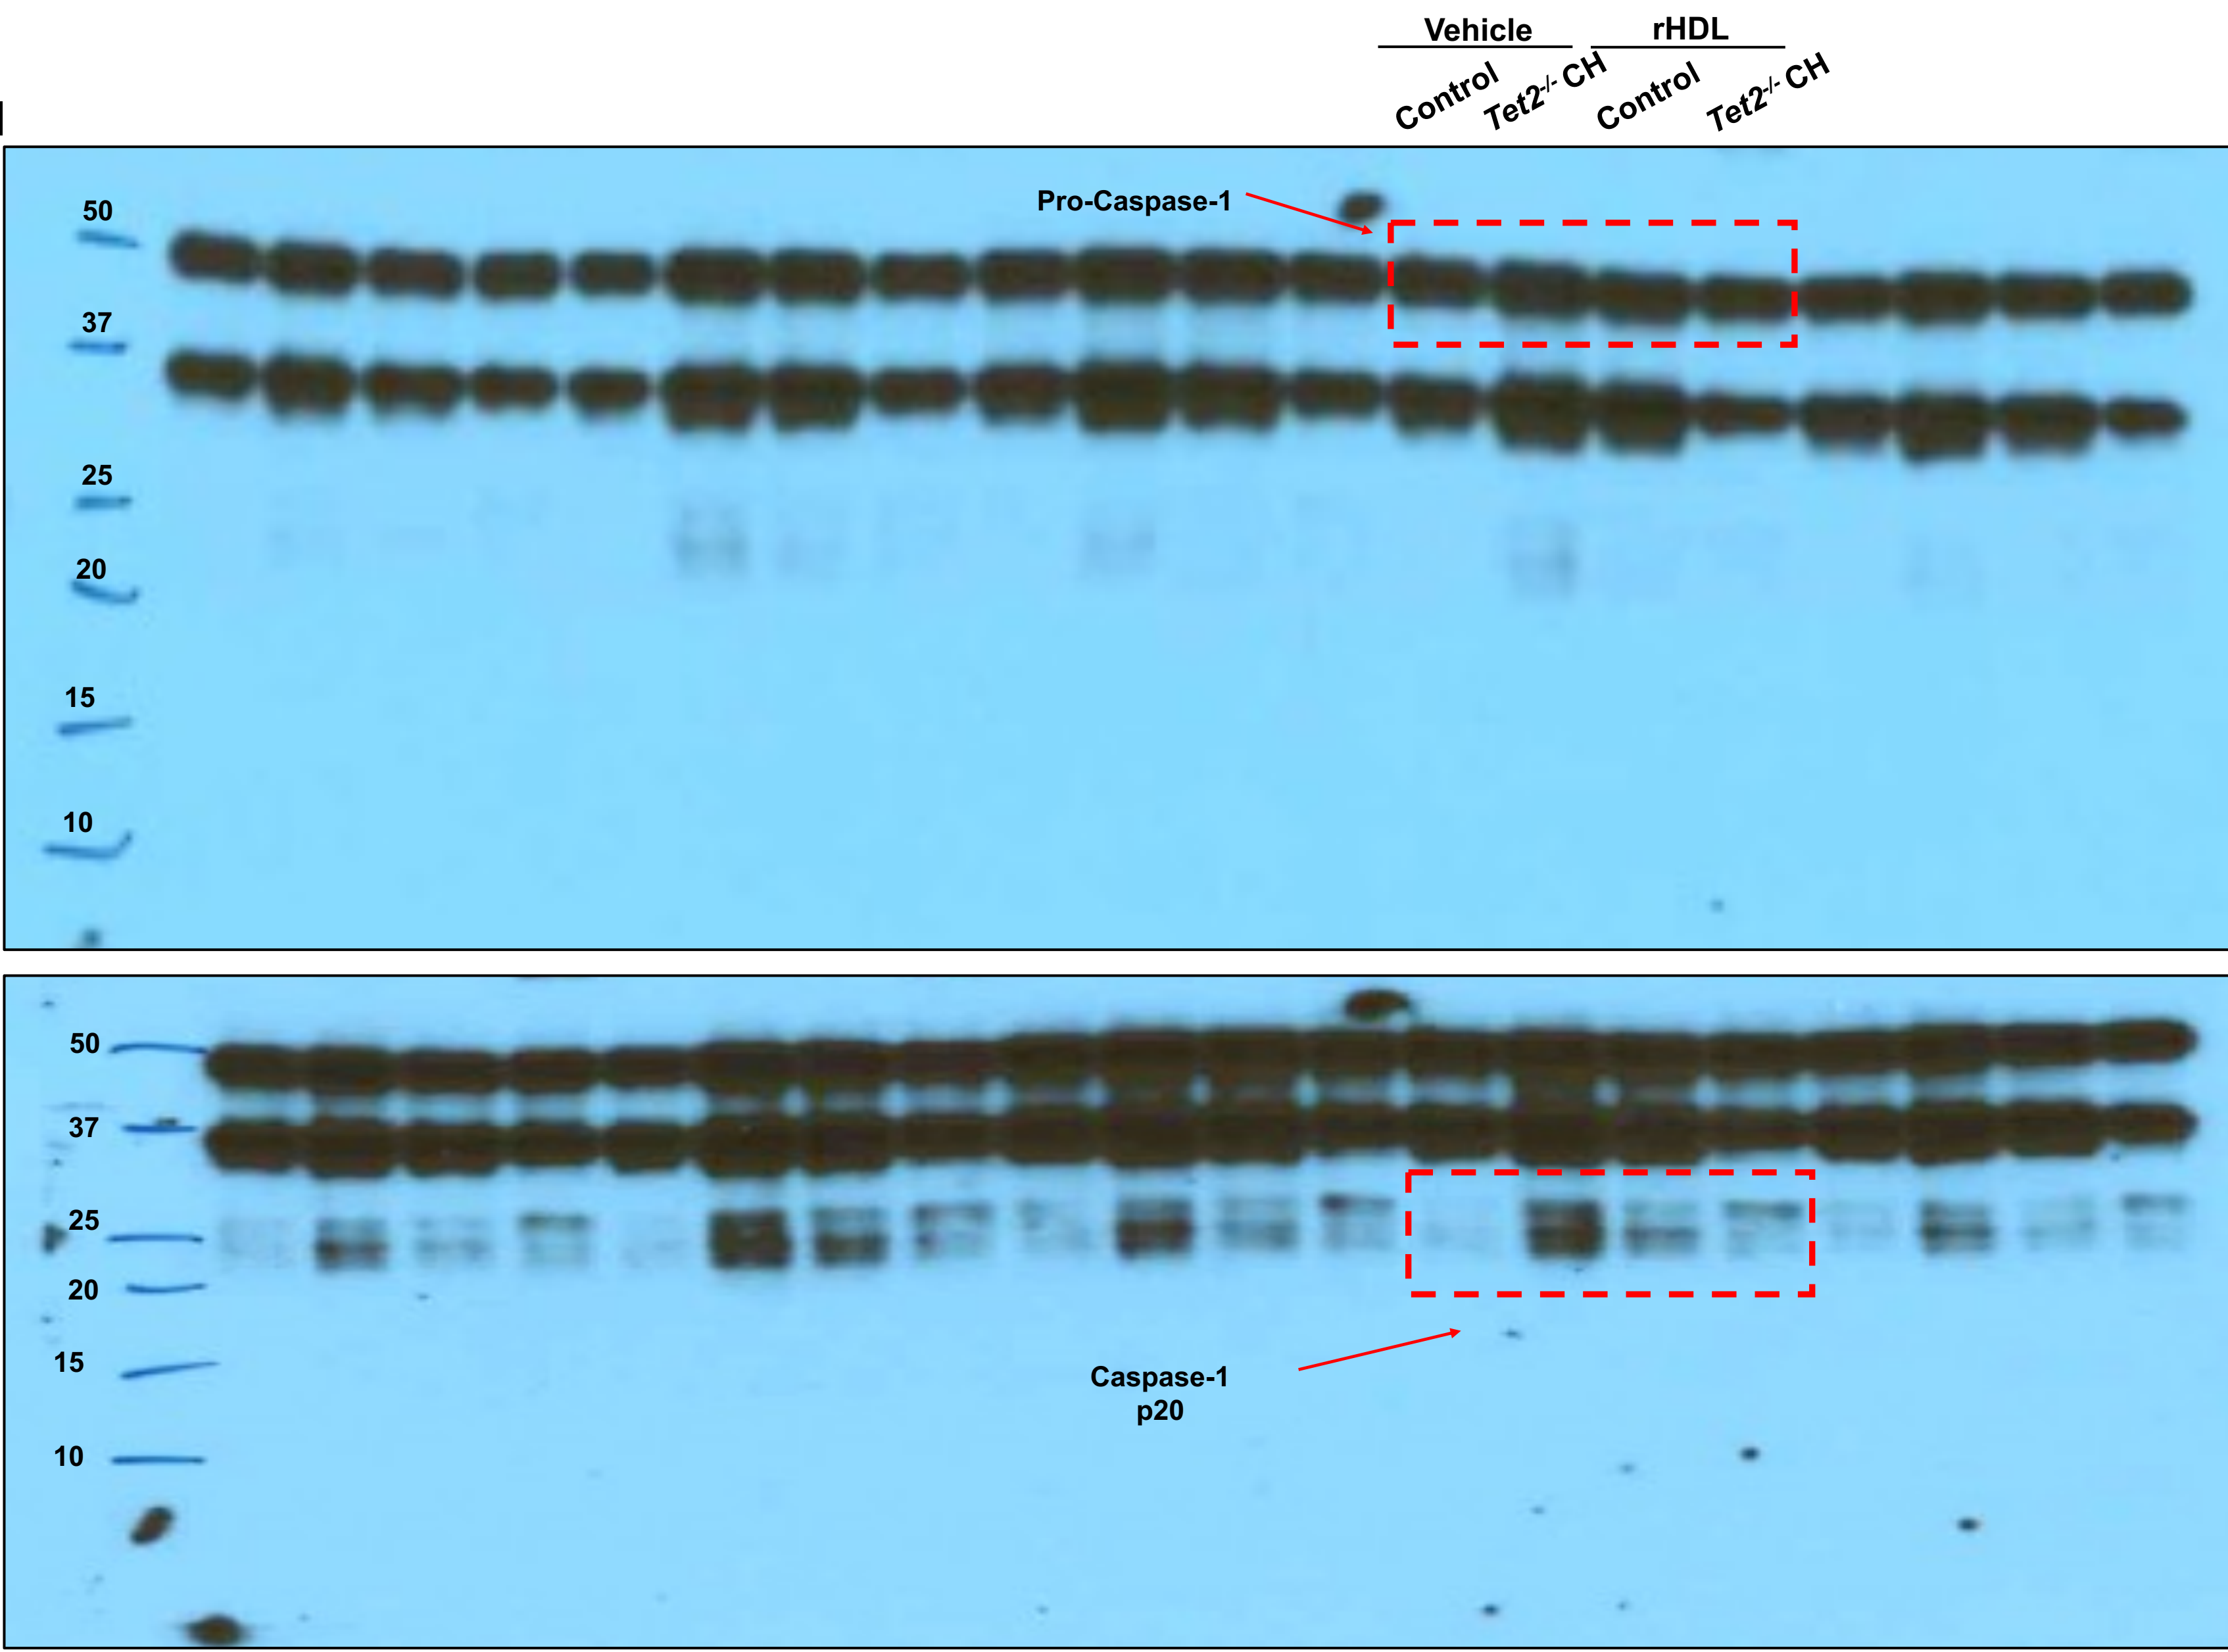

# Full unedited blots for Figure 1

I

Vehicle                      rHDL  
Control    Tet2<sup>-/-</sup> CH    Control    Tet2<sup>-/-</sup> CH

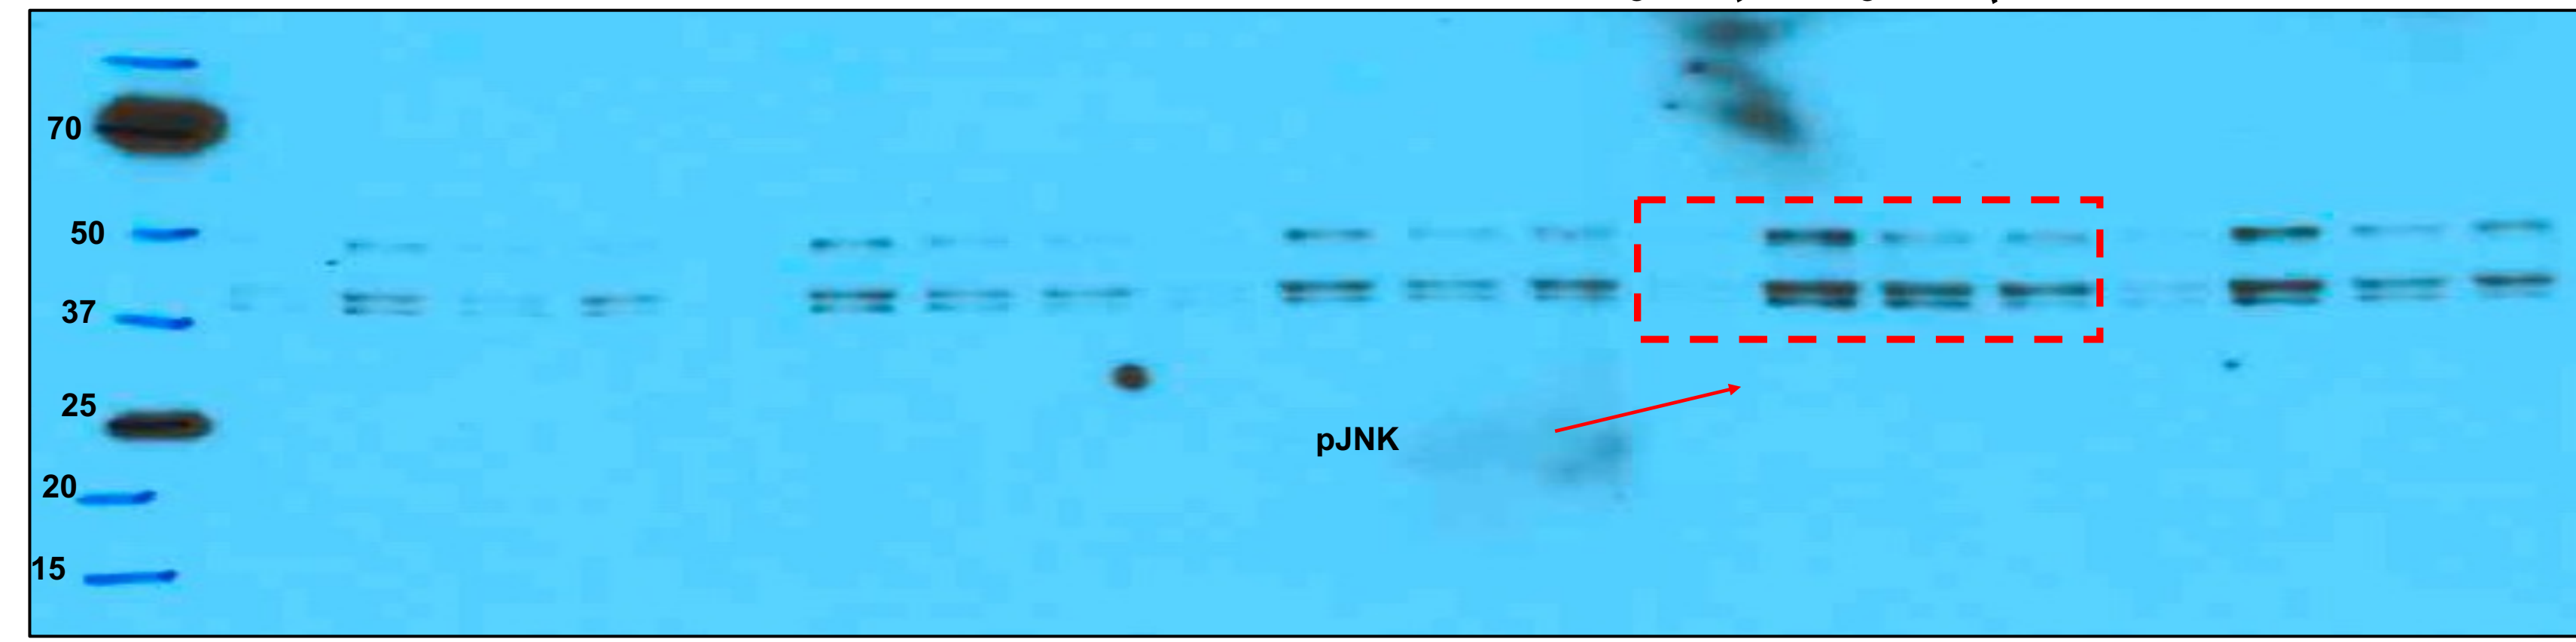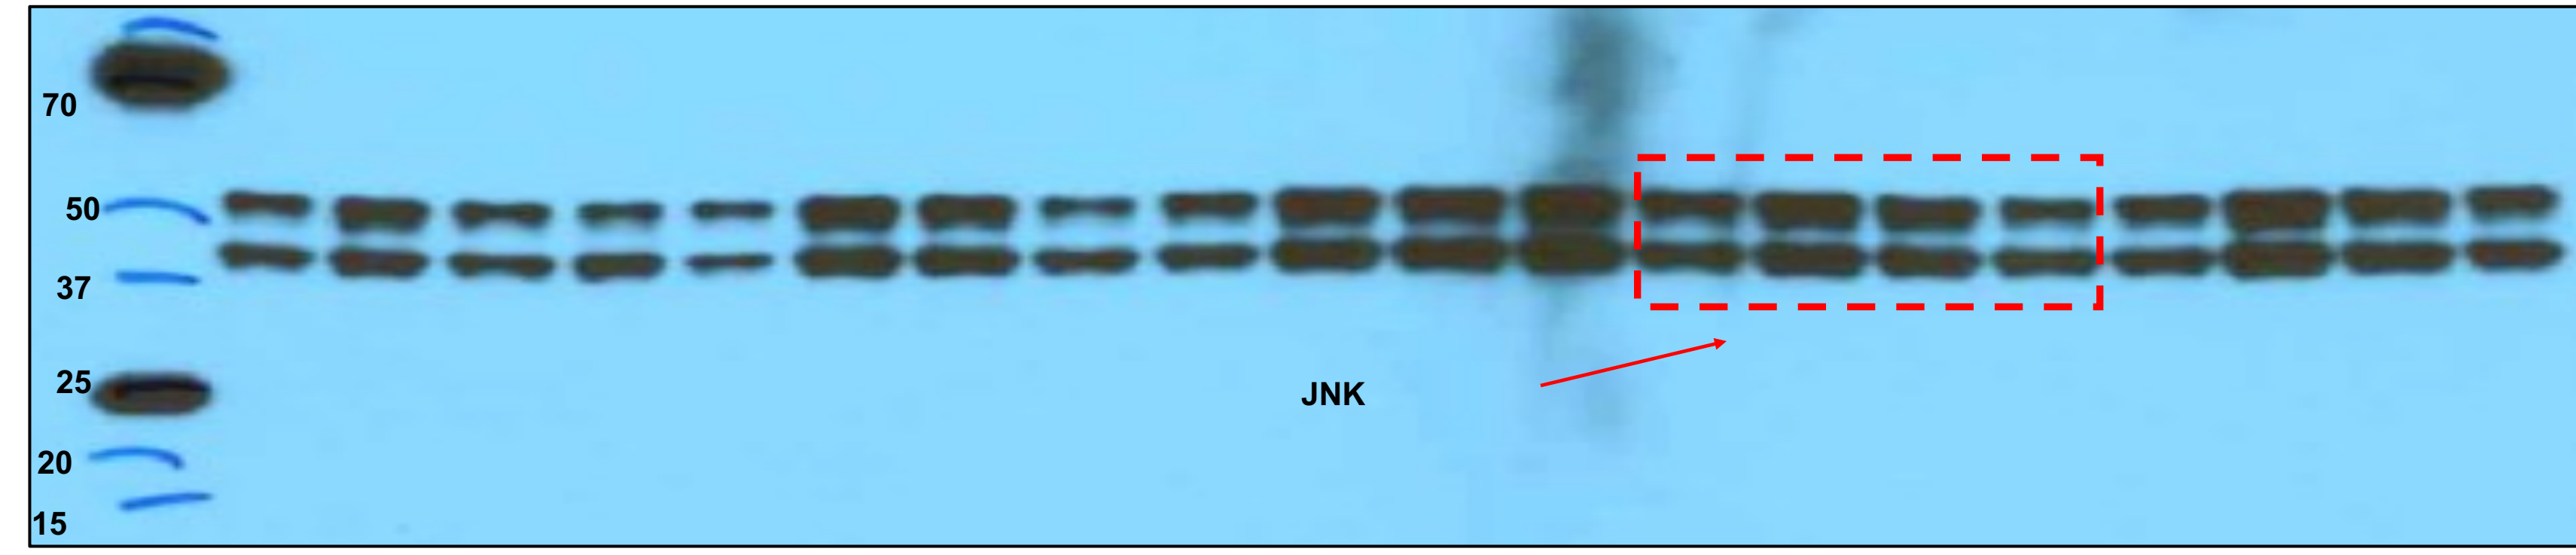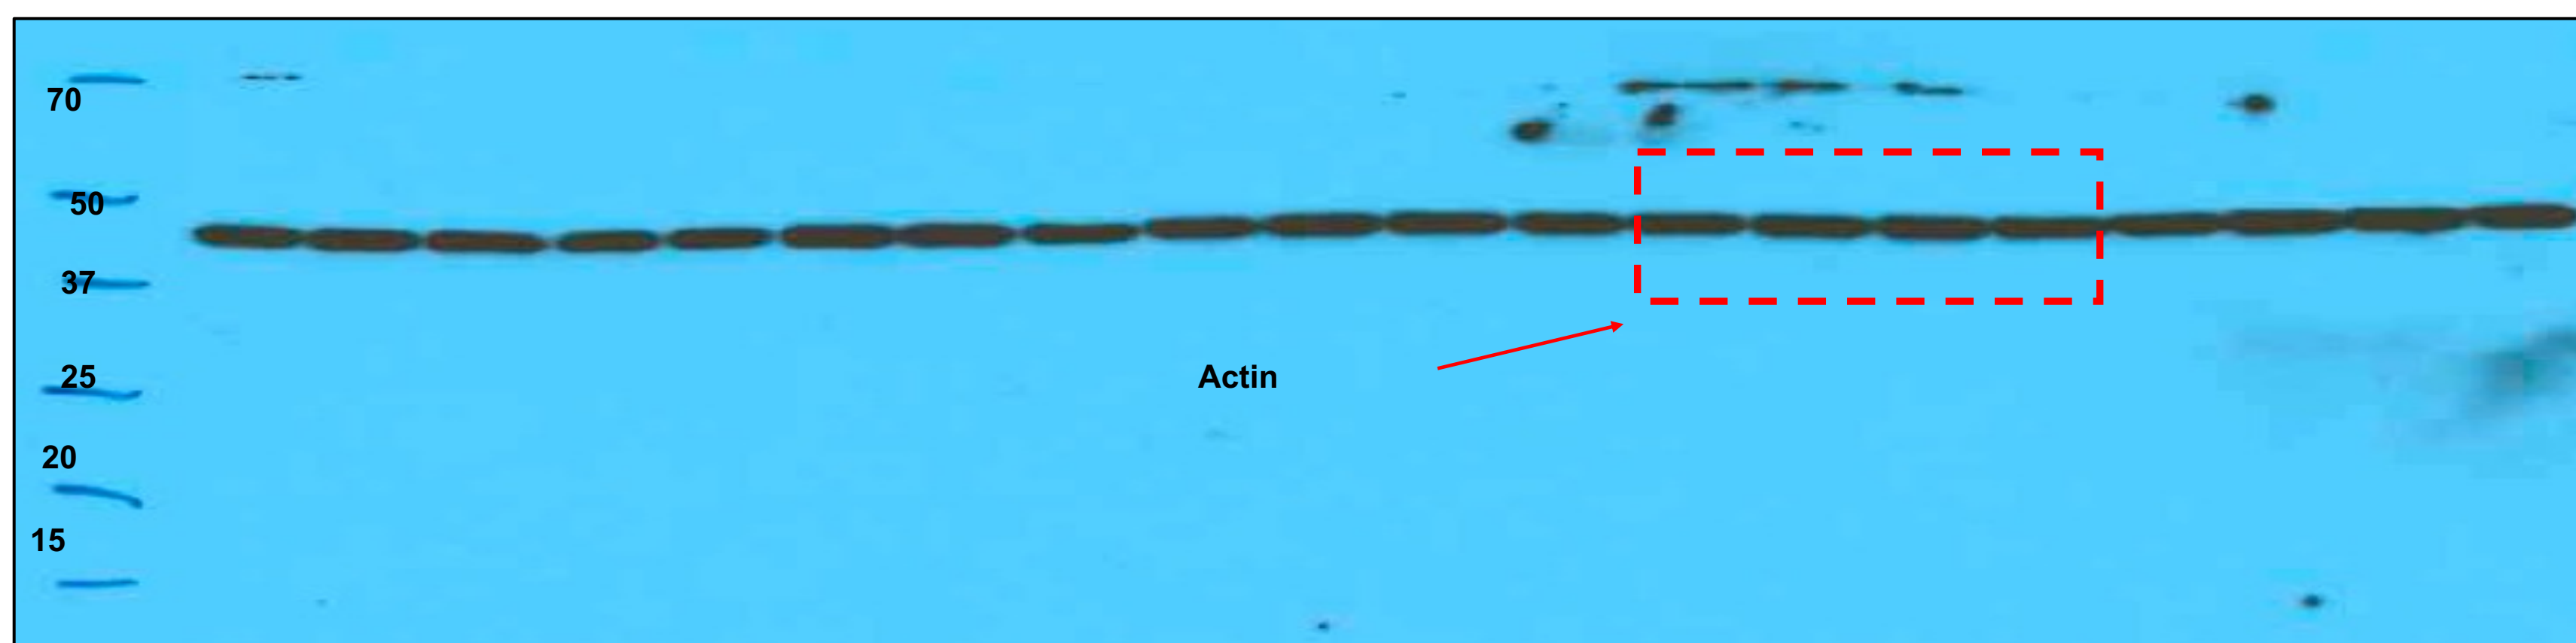

# Full unedited blots for Figure 2

E

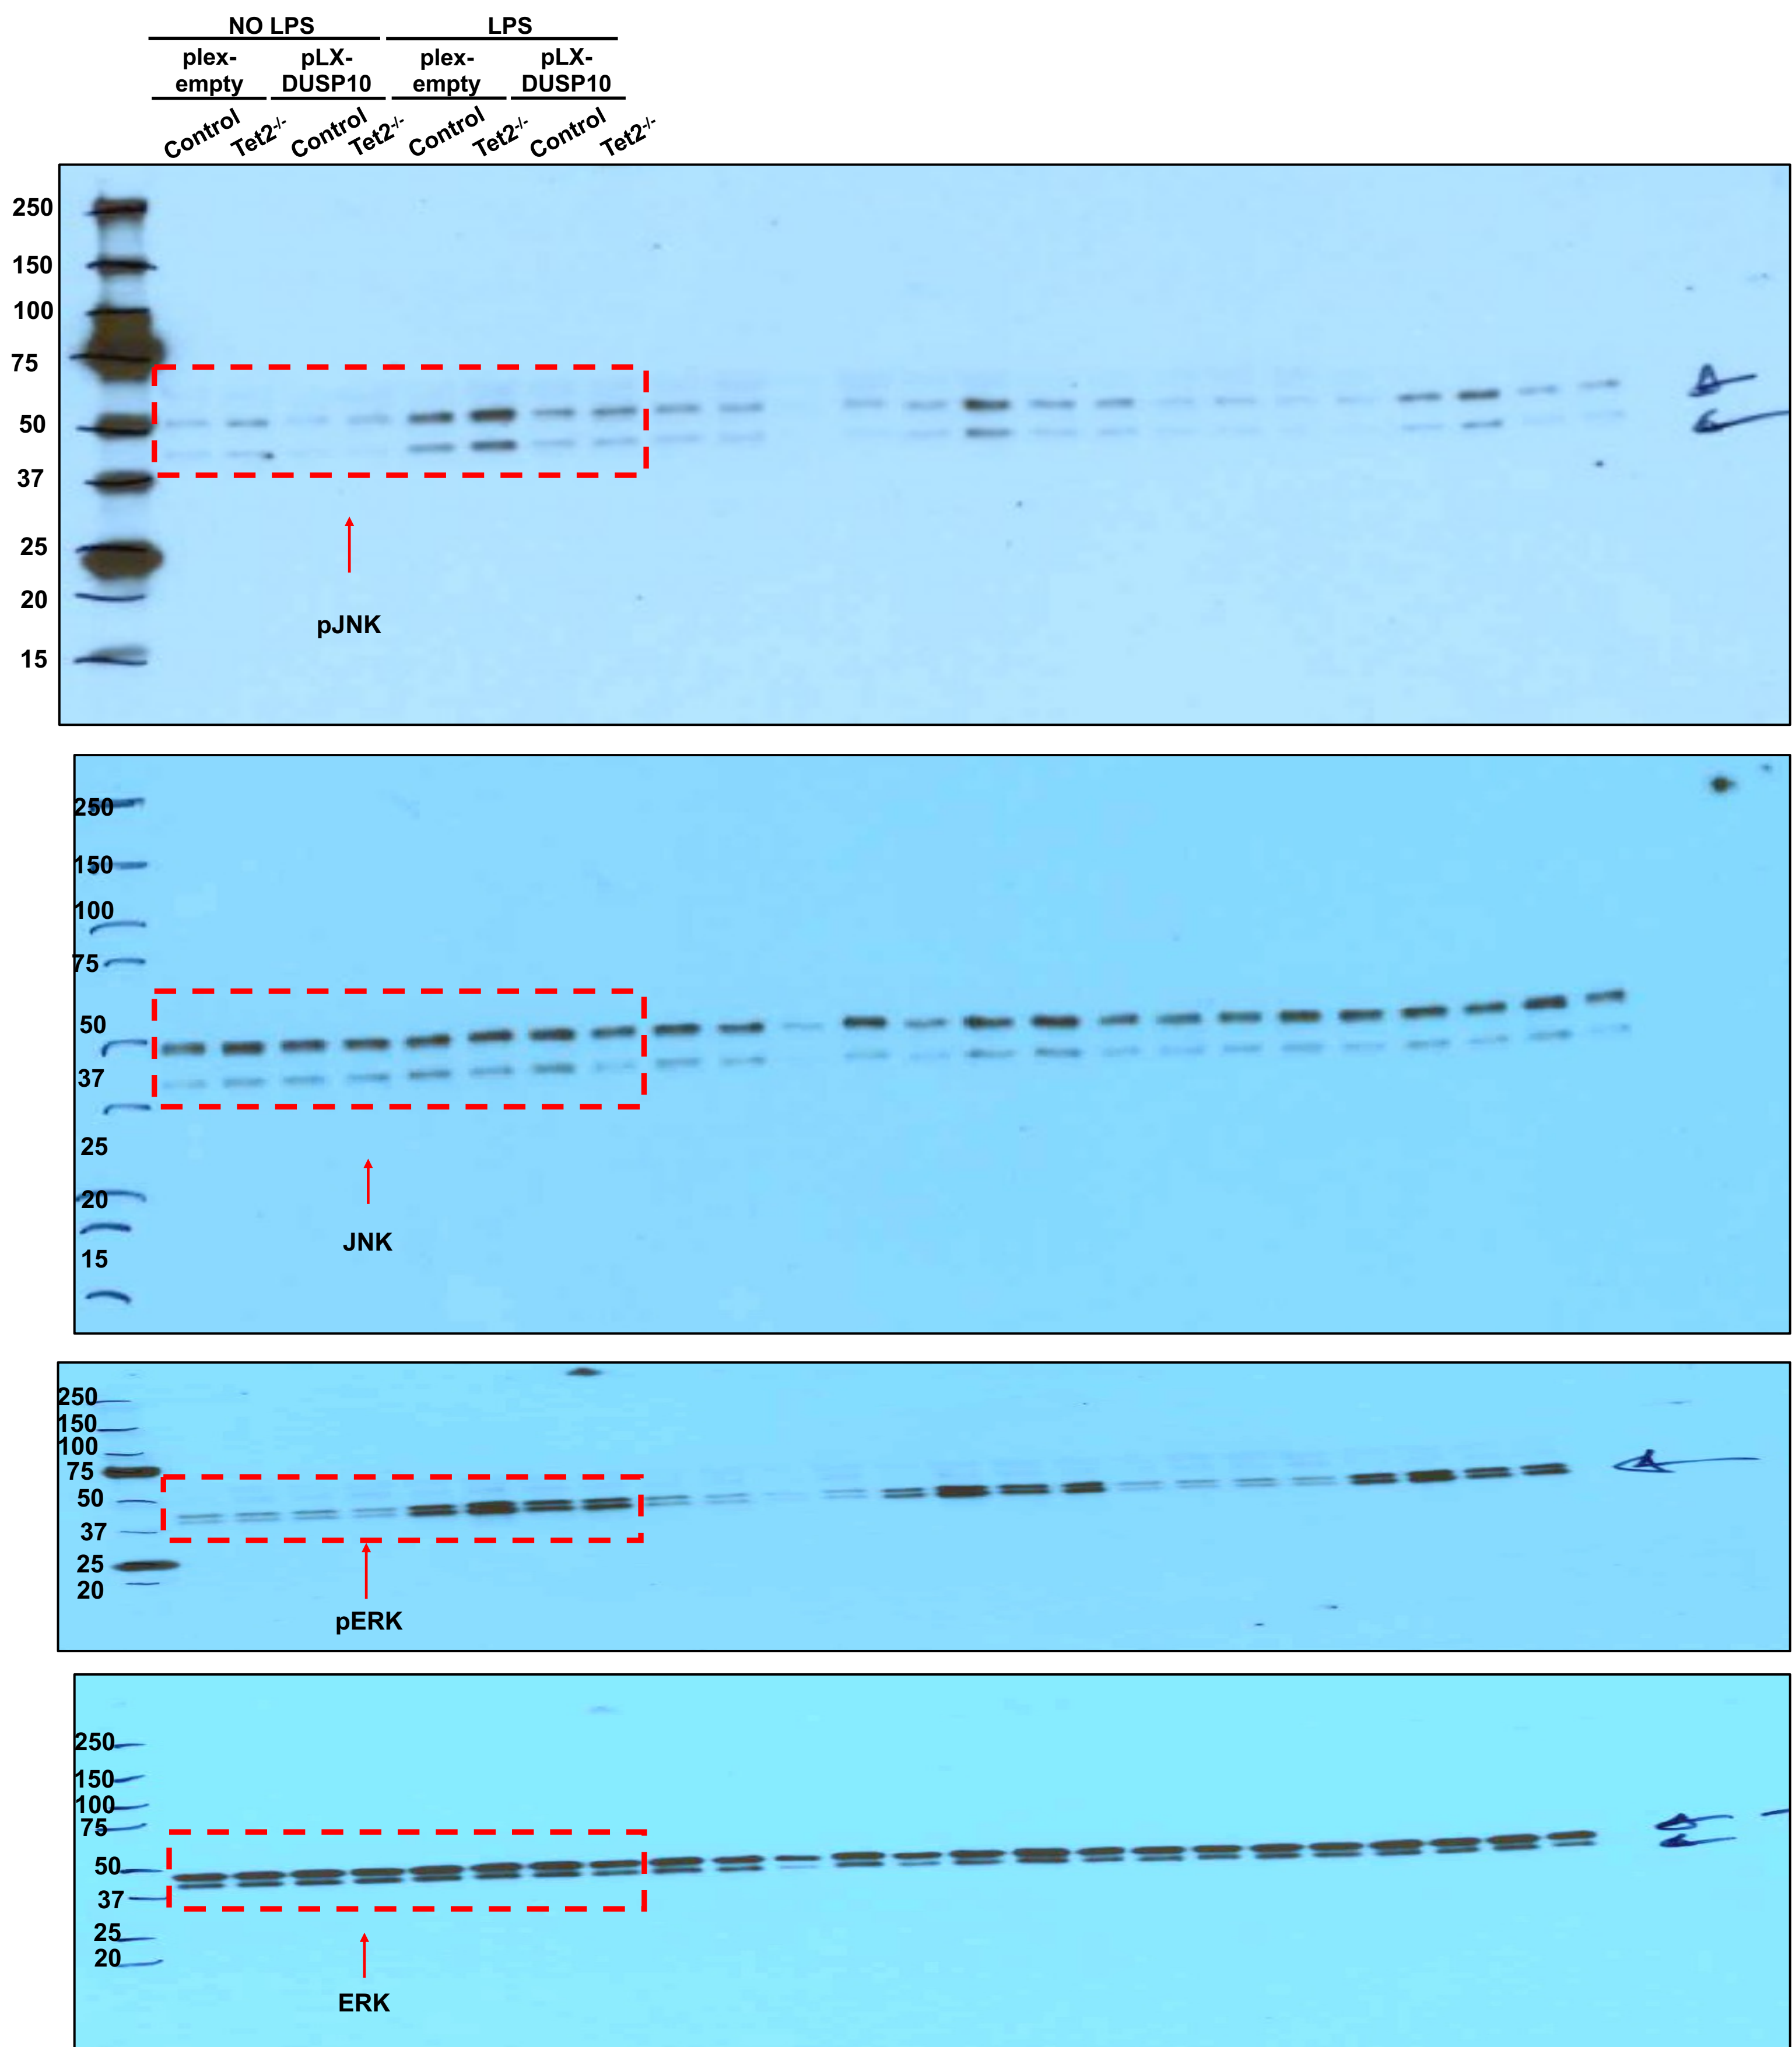

# Full unedited blots for Figure 2

E

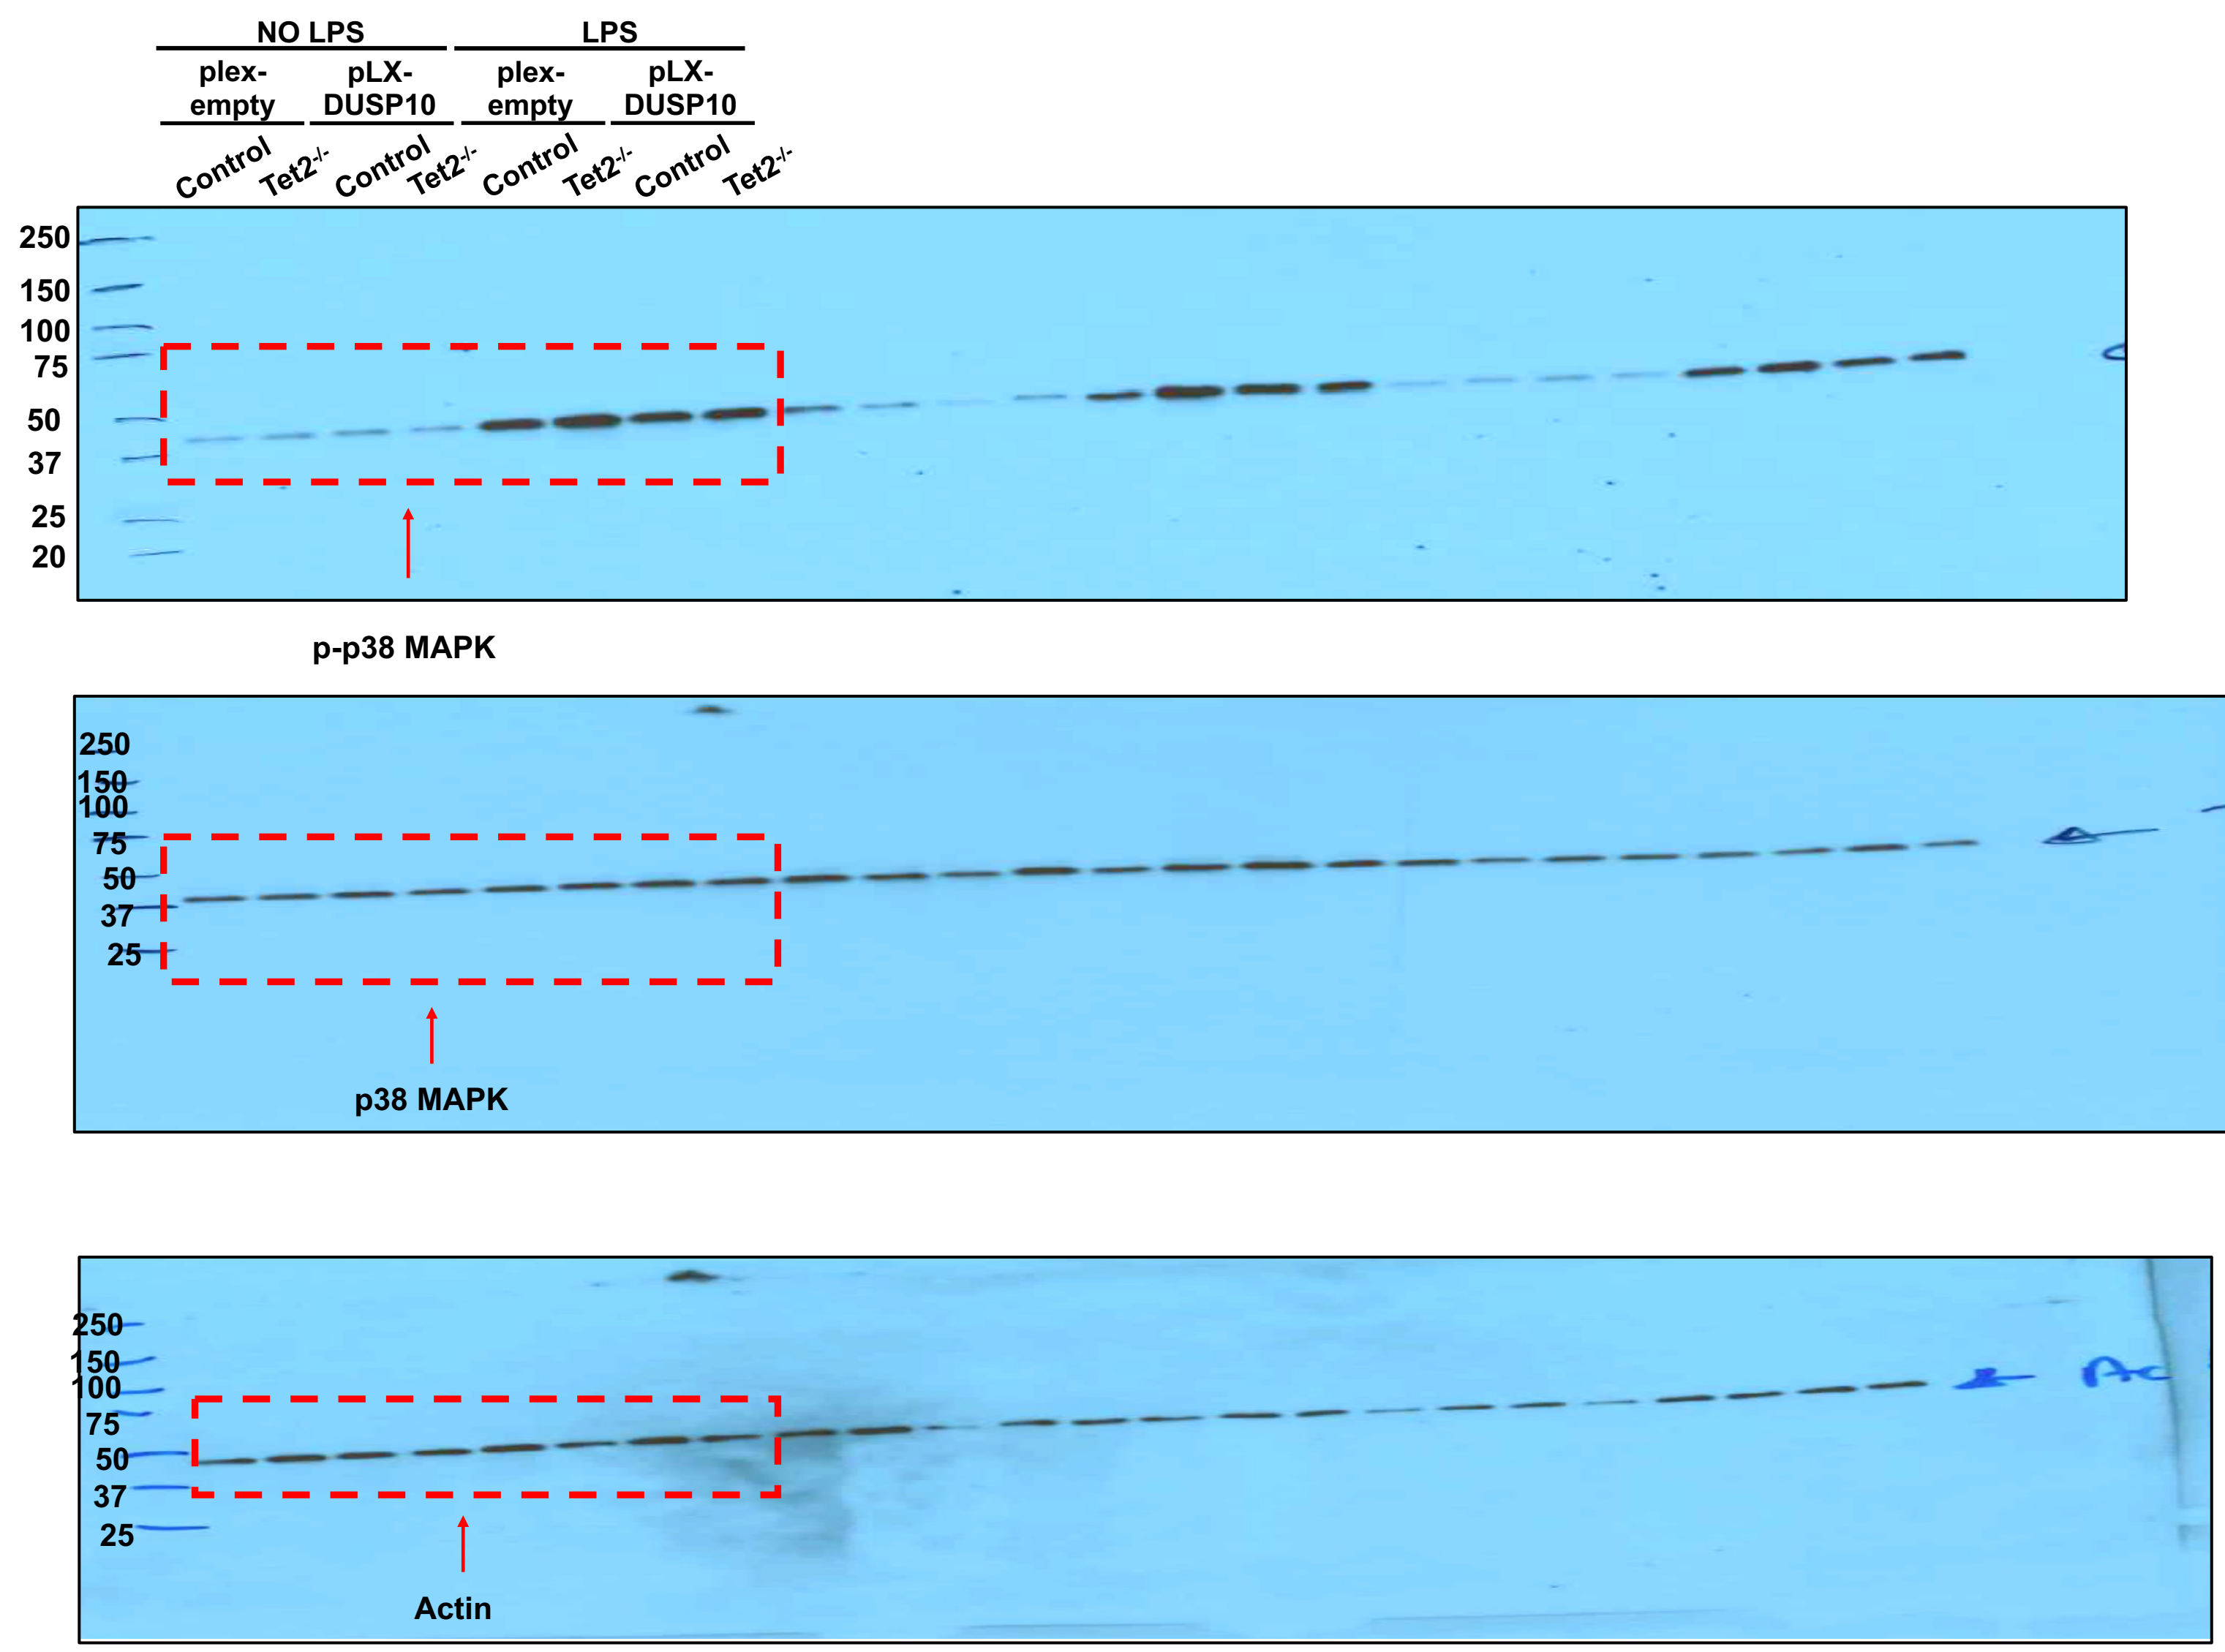

# Full unedited blots for Figure 3

**A**

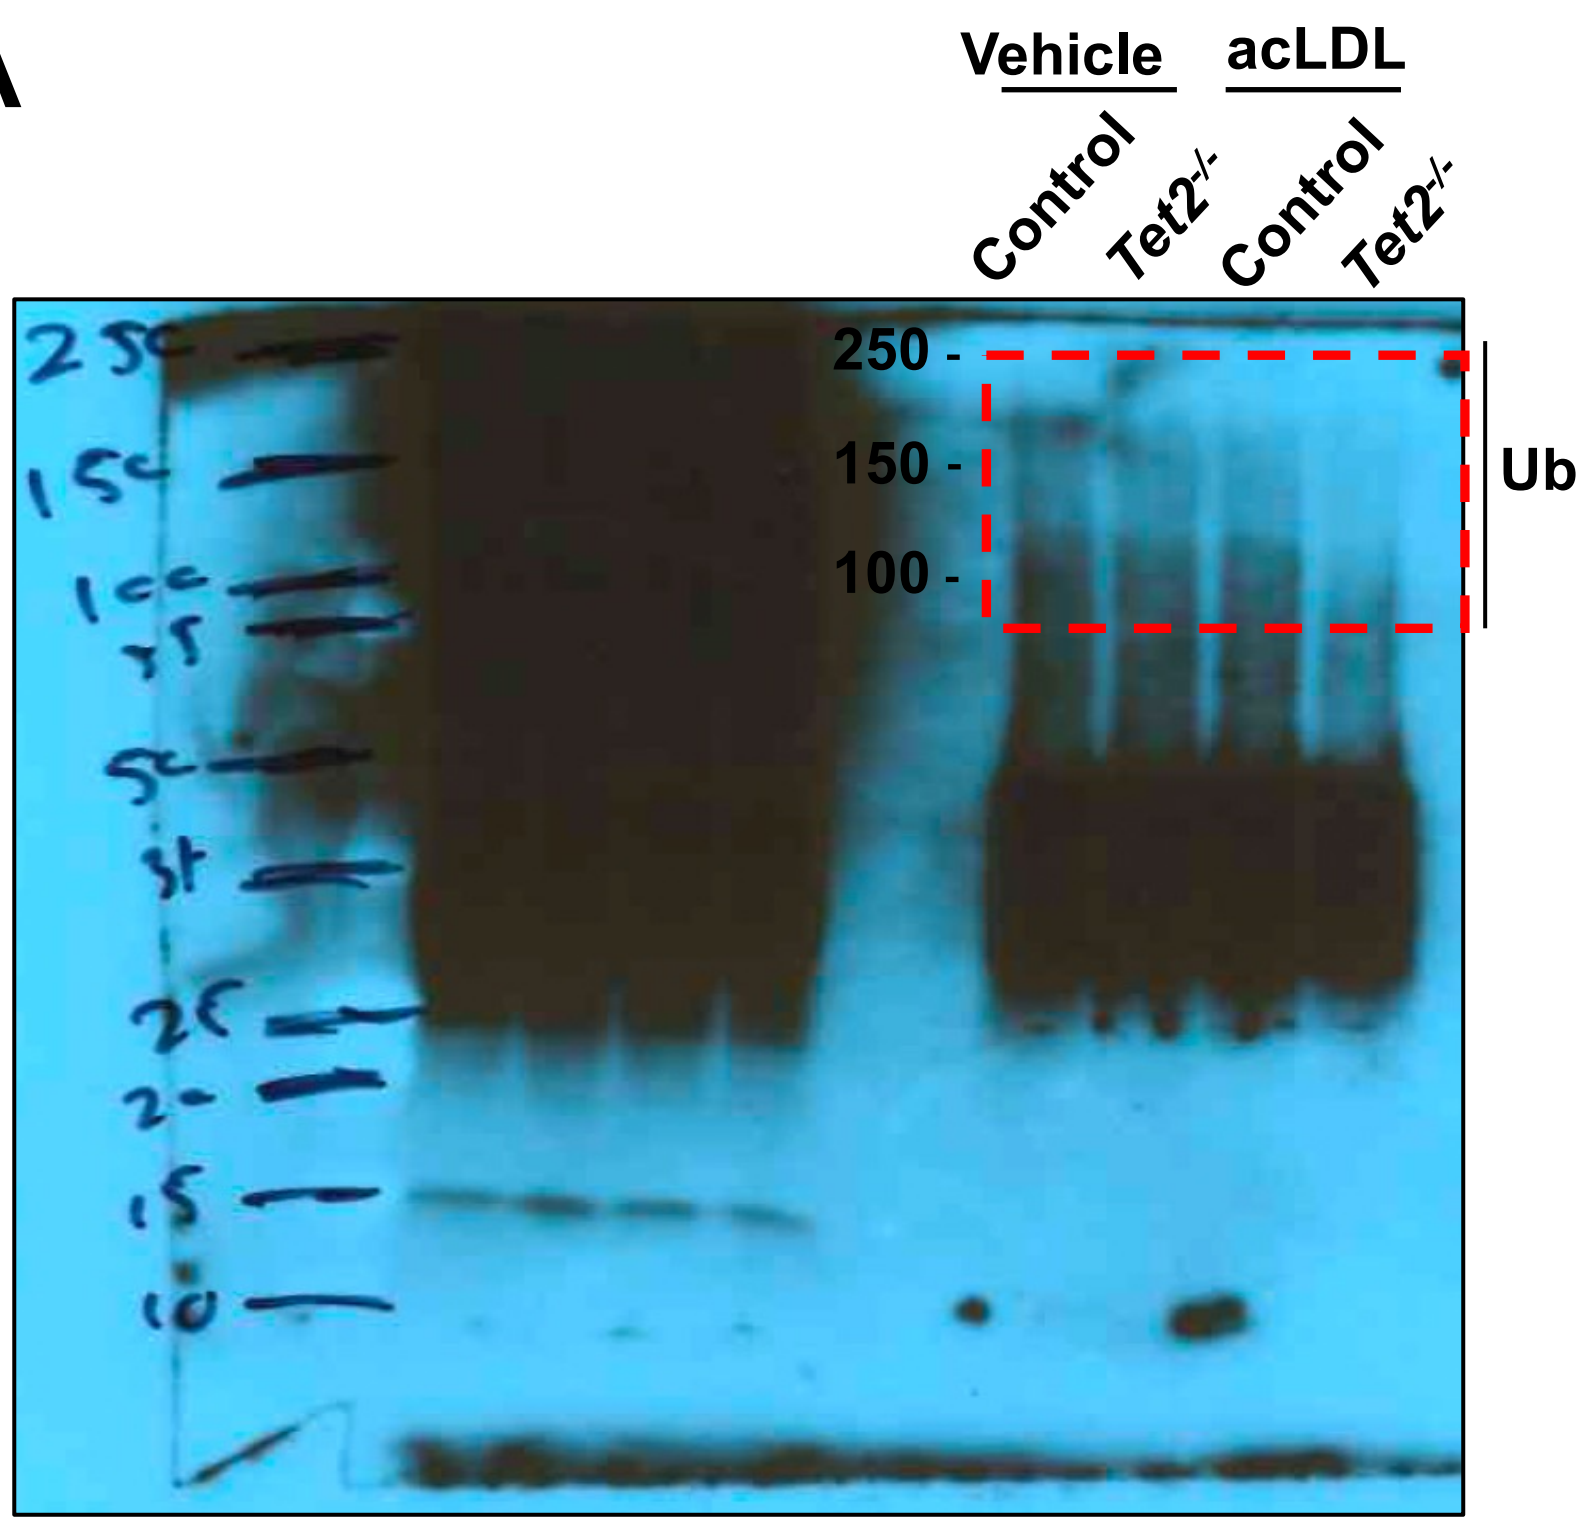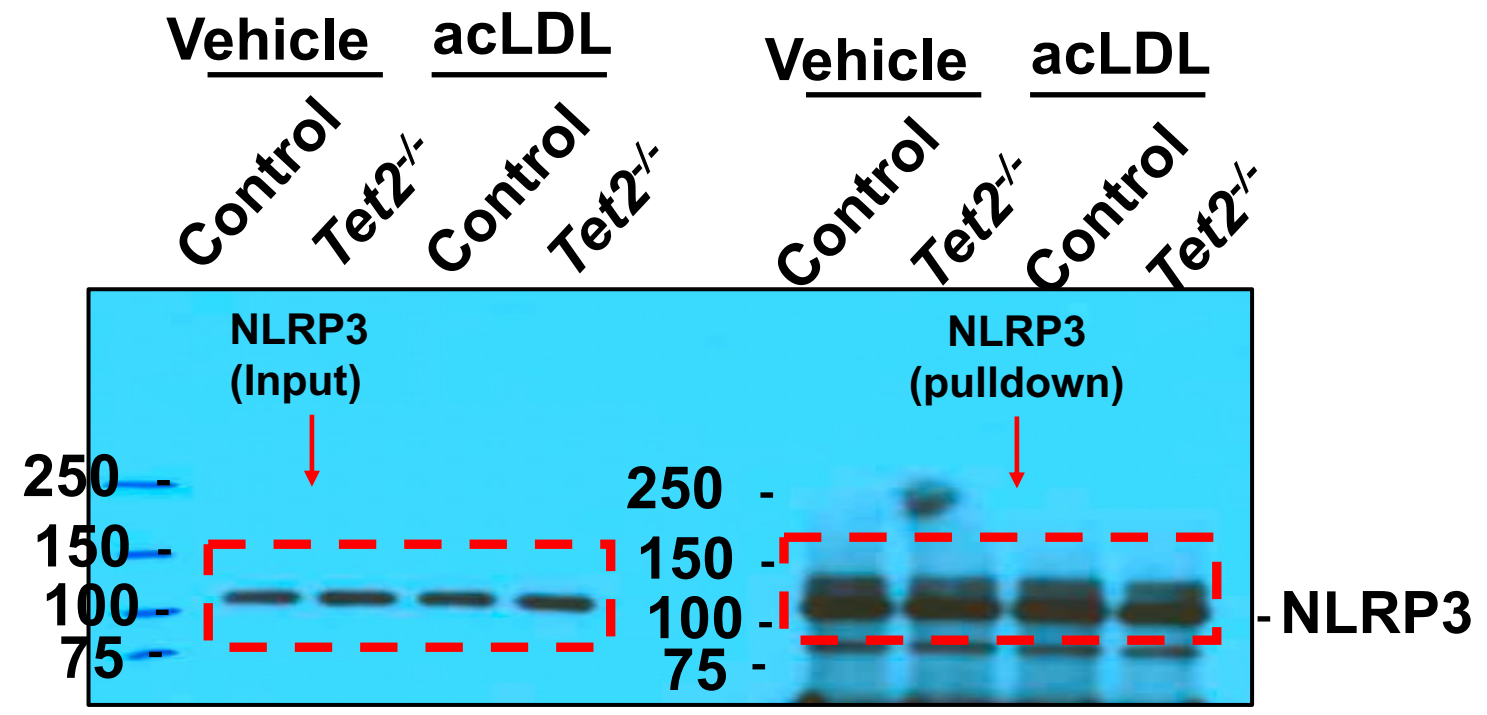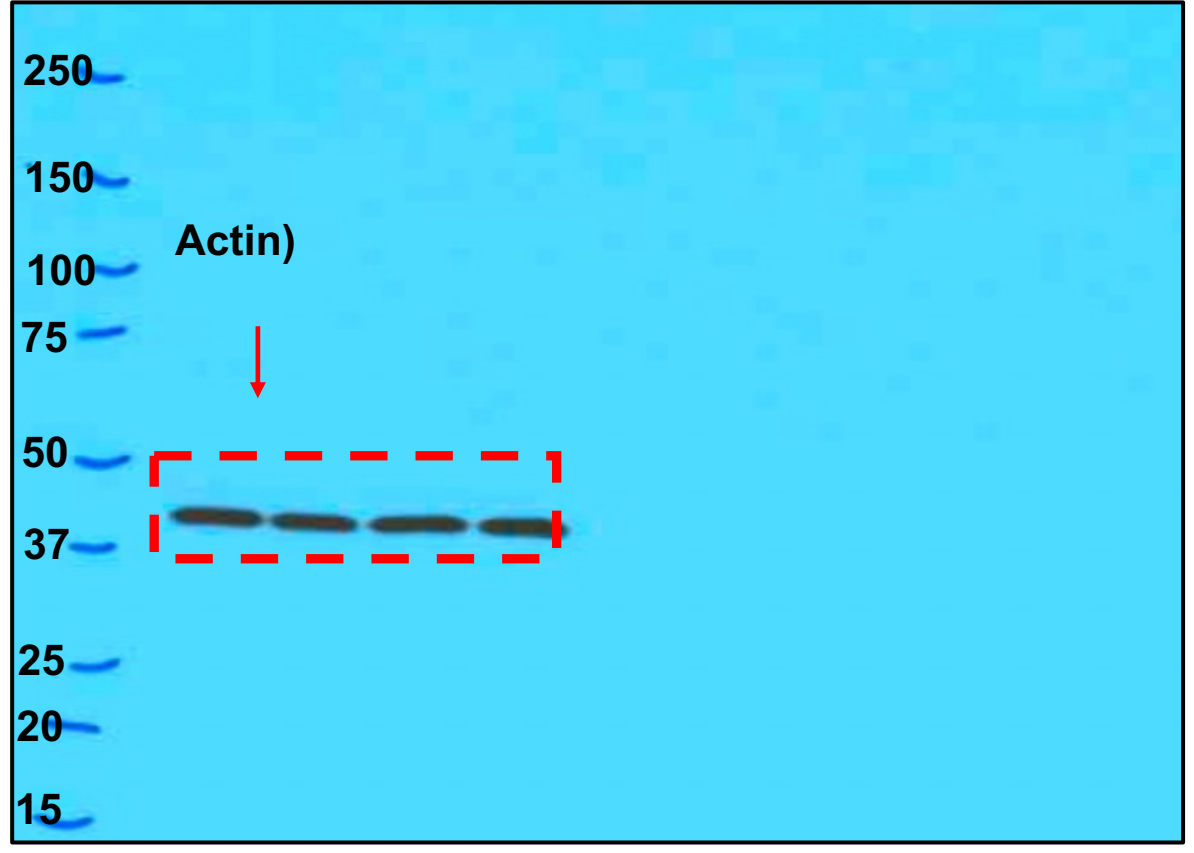

# Full unedited blots for Figure 4

C

hESC WT  
hESC TET2<sup>-/-</sup>  
hESC WT  
hESC TET2<sup>-/-</sup>

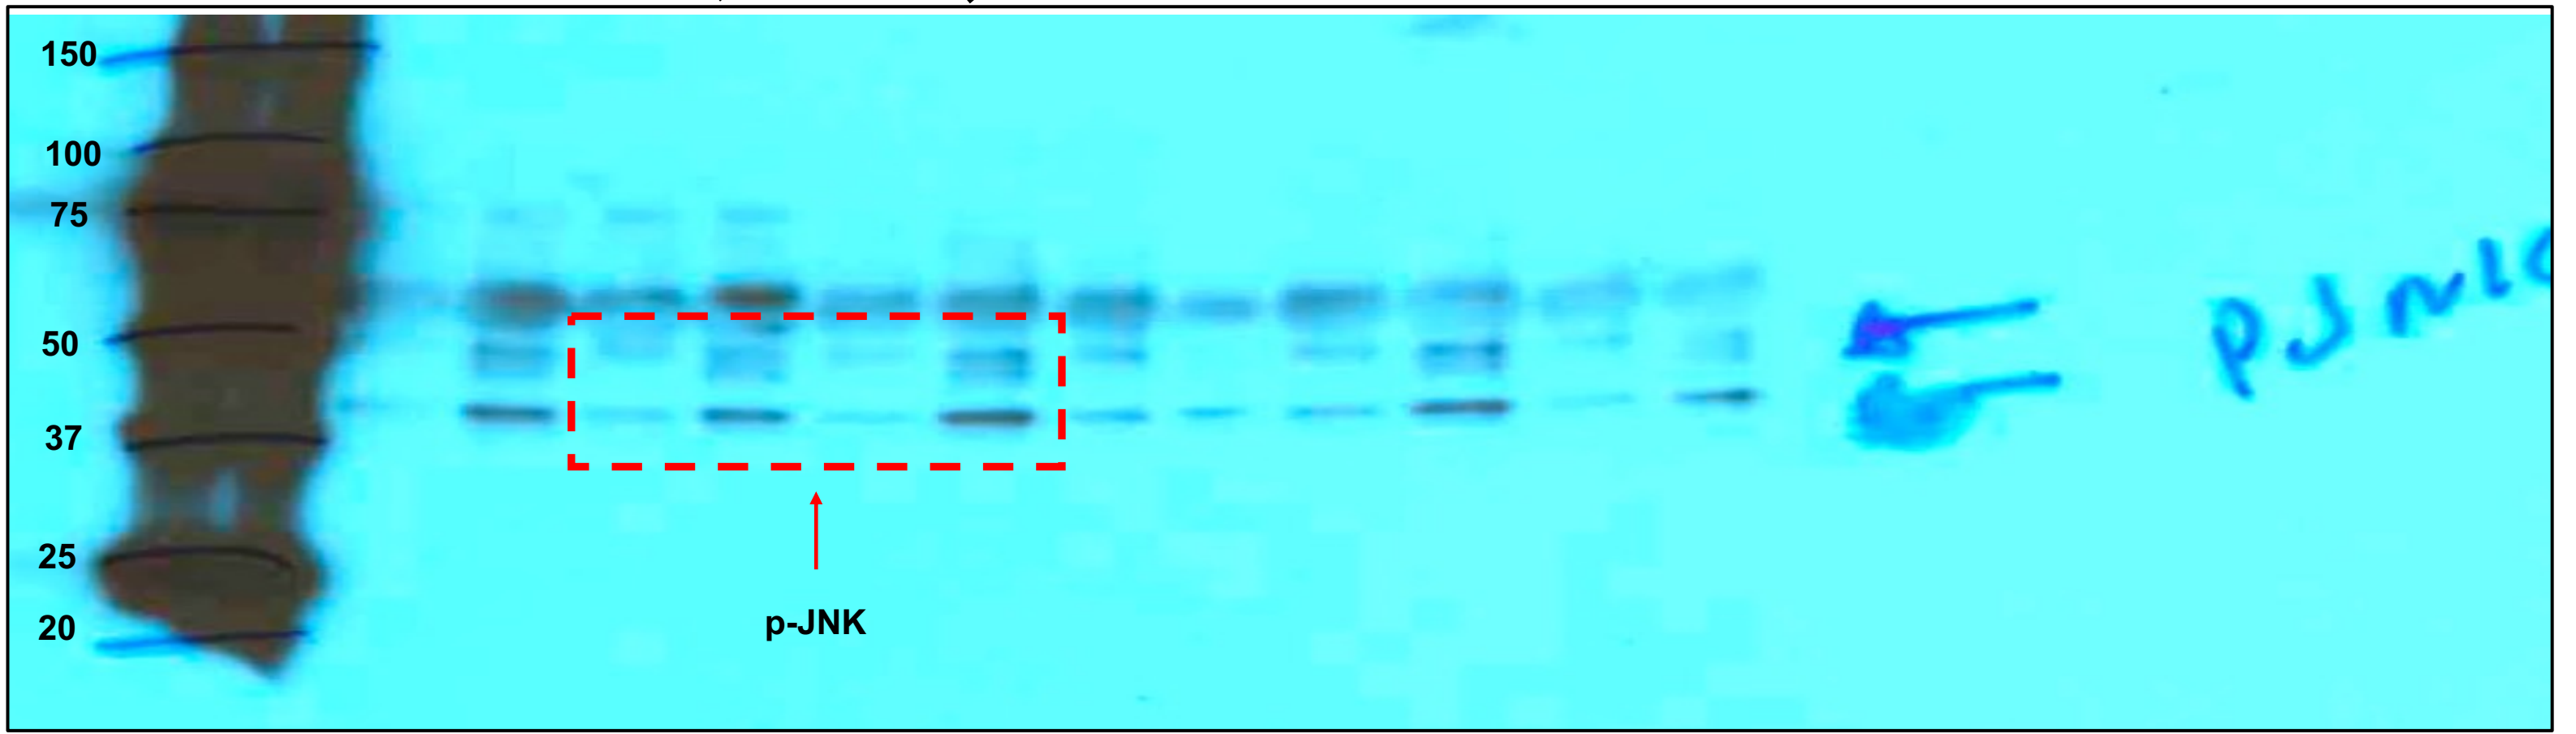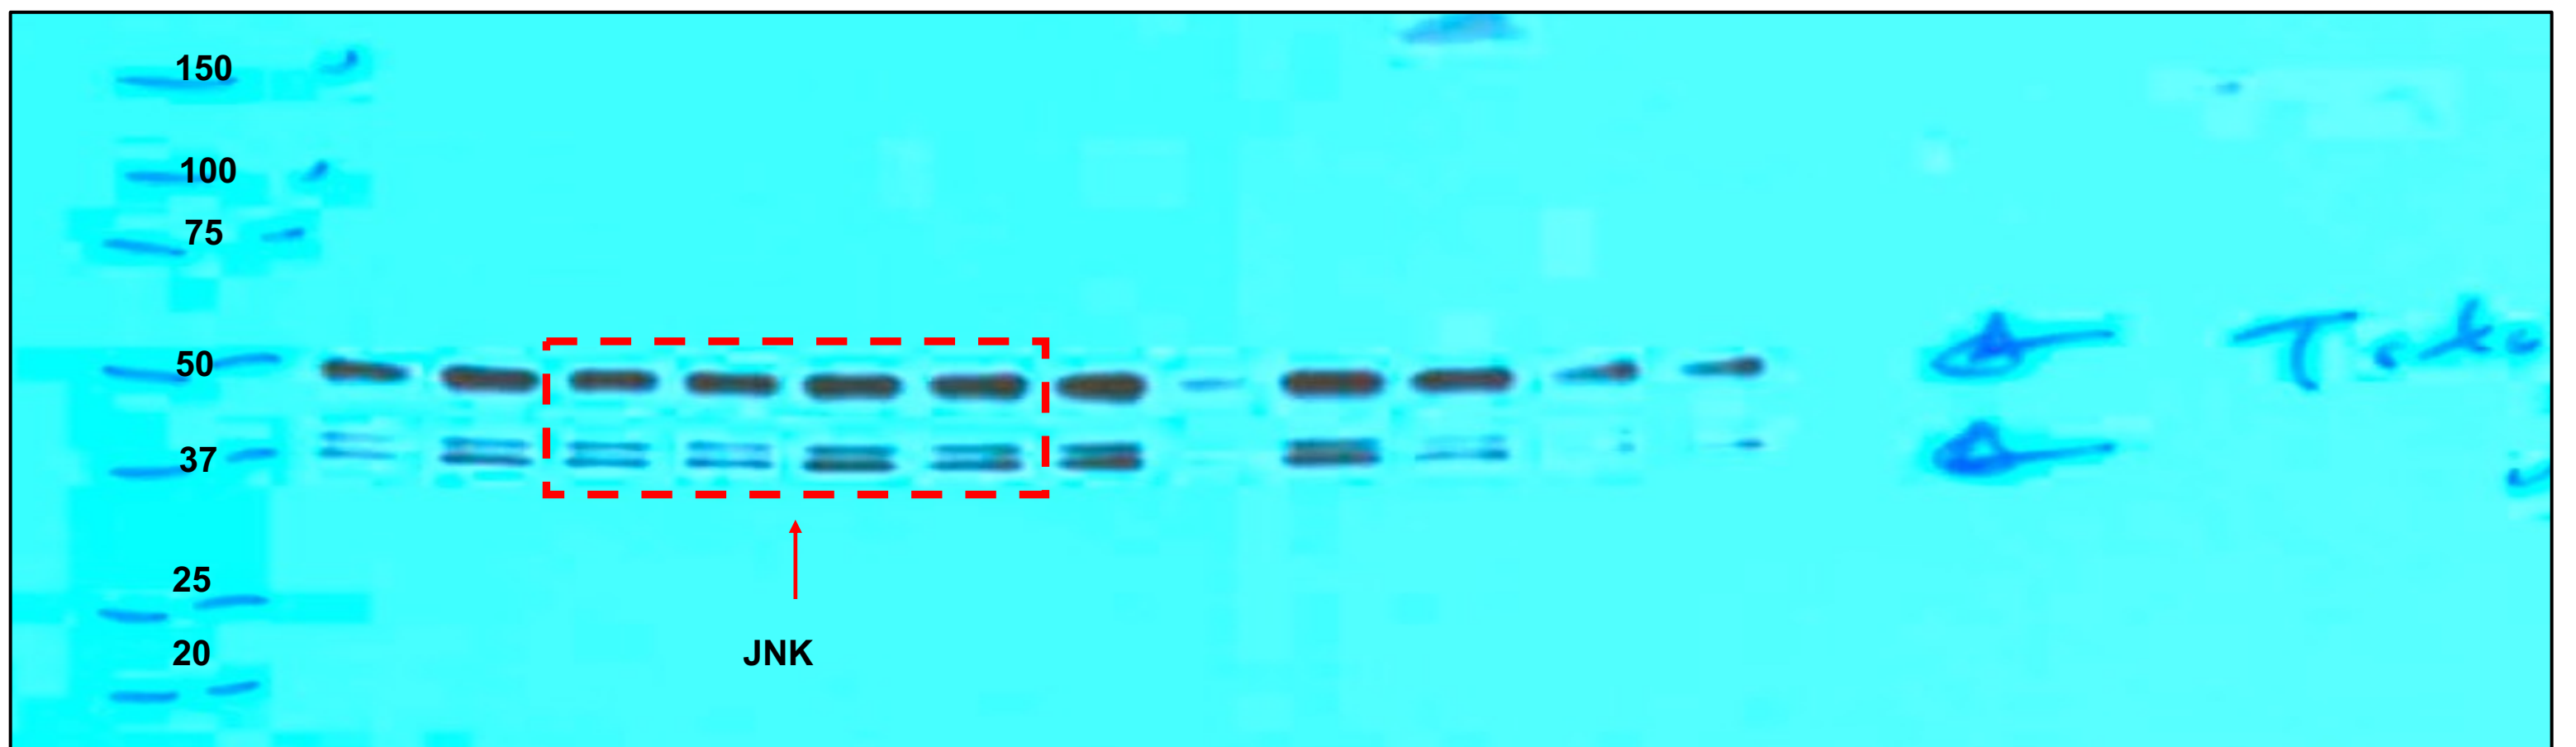



# Full unedited blots for Figure 5

A

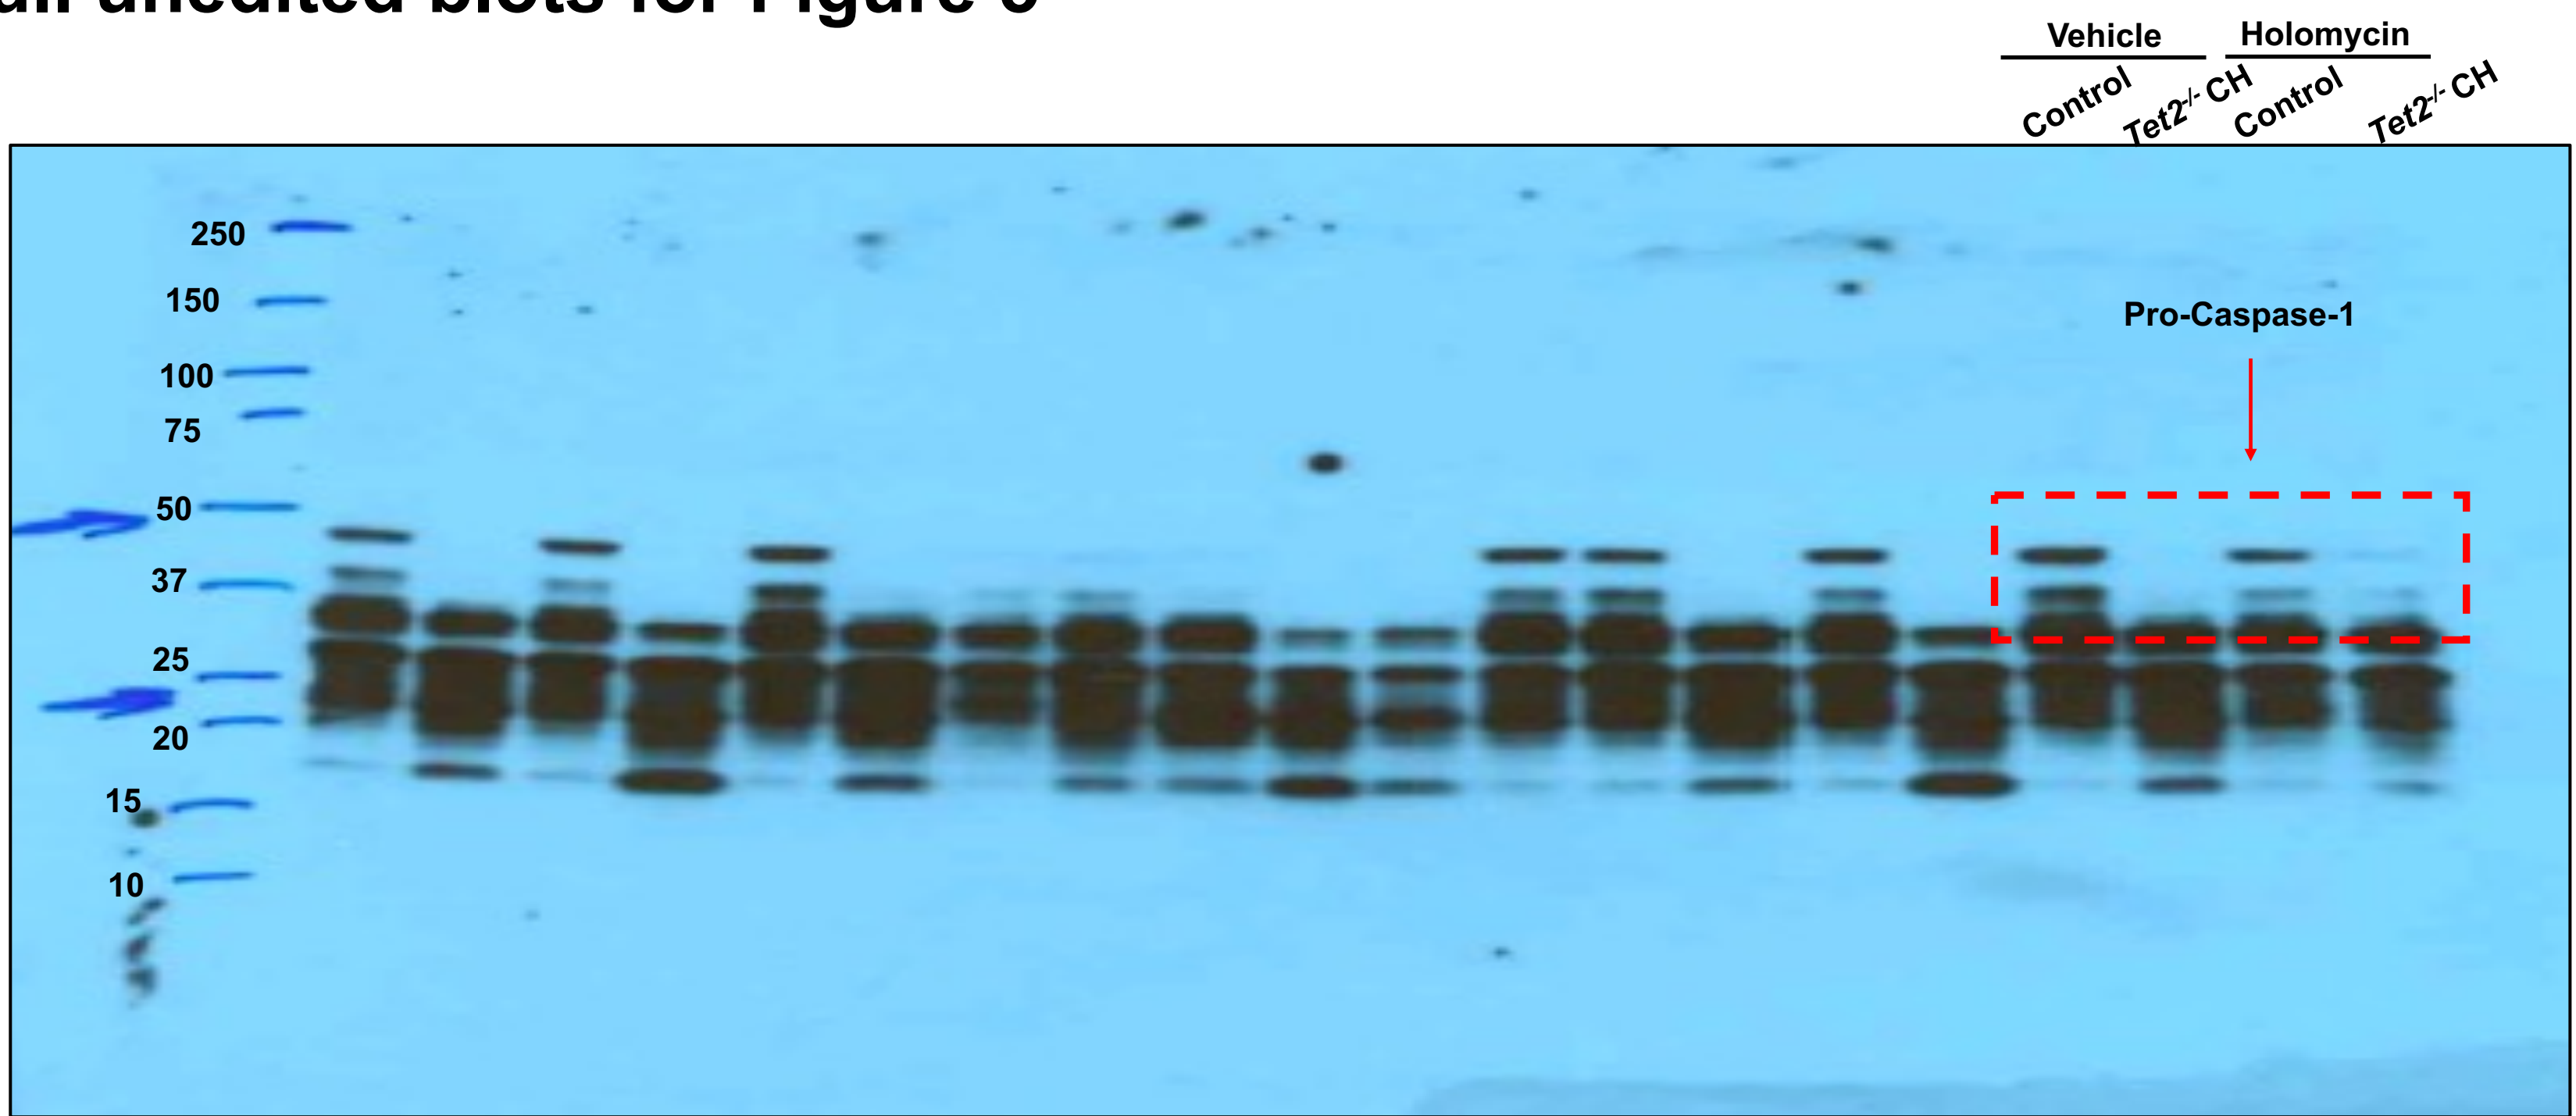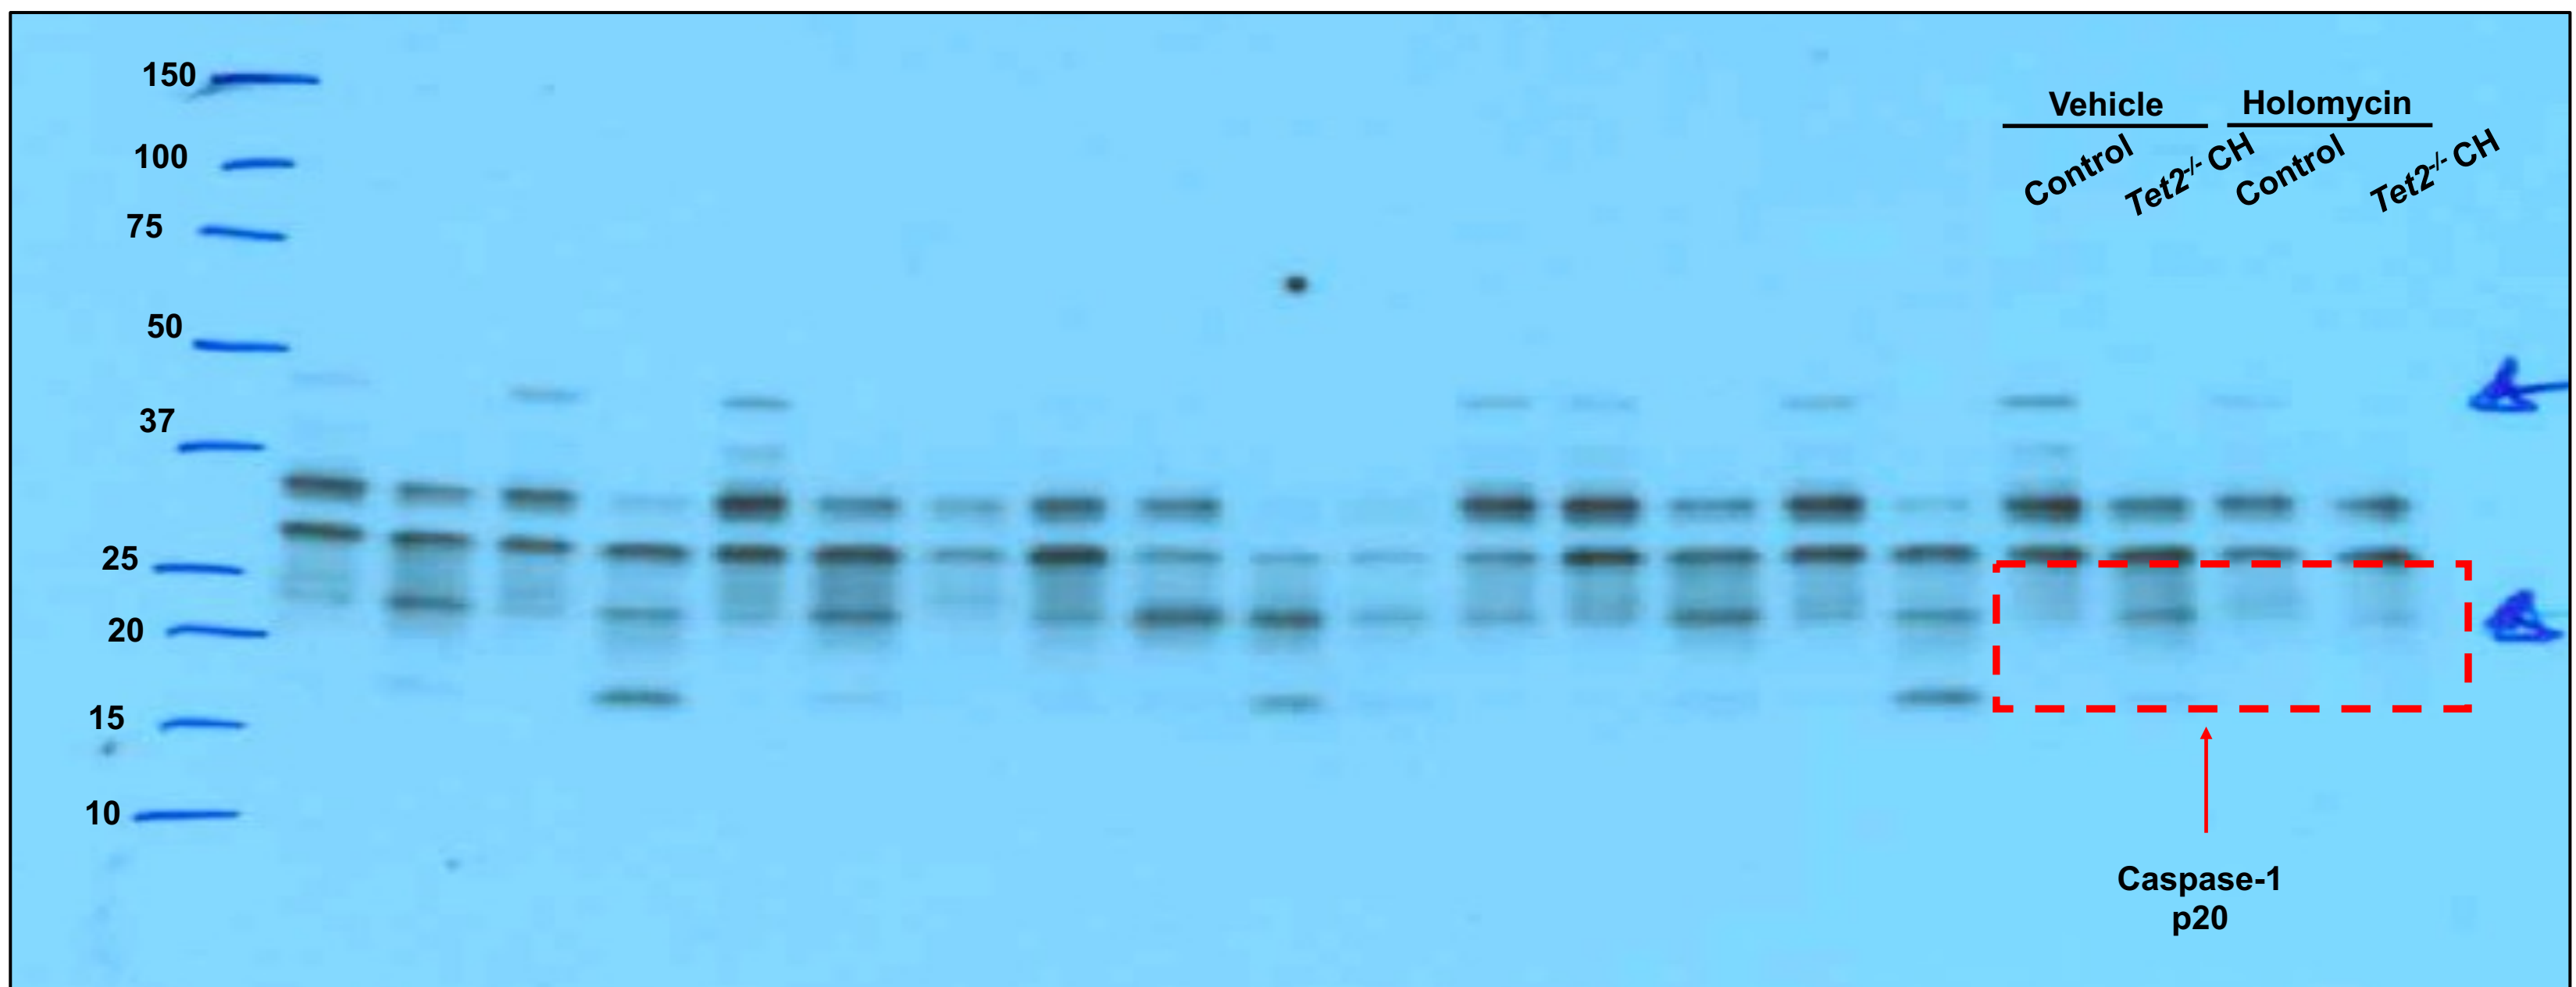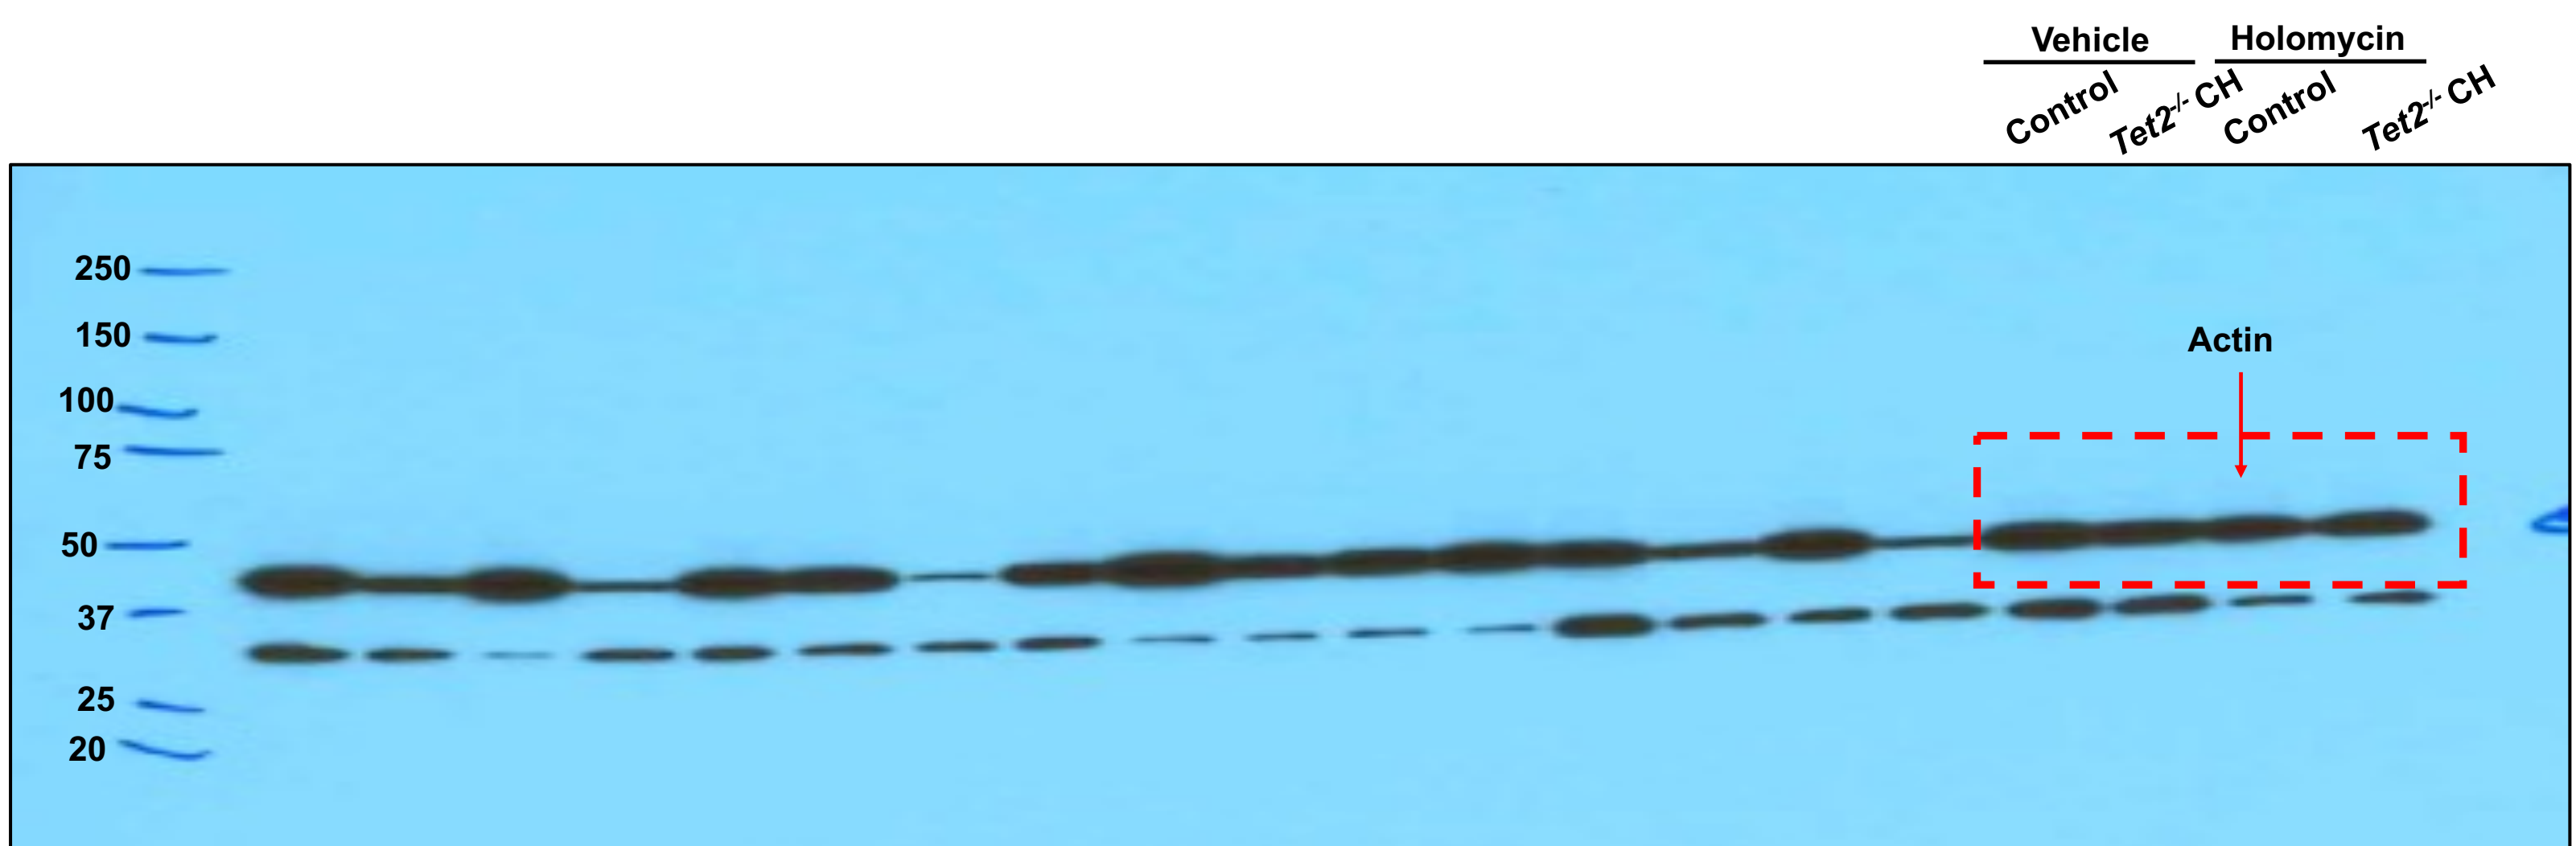

# Full unedited blots for Figure 6

Control  
Tet2<sup>-/-</sup>-CH  
Tet2<sup>-/-</sup>-CH  
Abro1<sup>-/-</sup>  
Abro1<sup>-/-</sup>-Tet2<sup>-/-</sup>-CH  
Abro1<sup>-/-</sup>-Tet2<sup>-/-</sup>-CH

## A

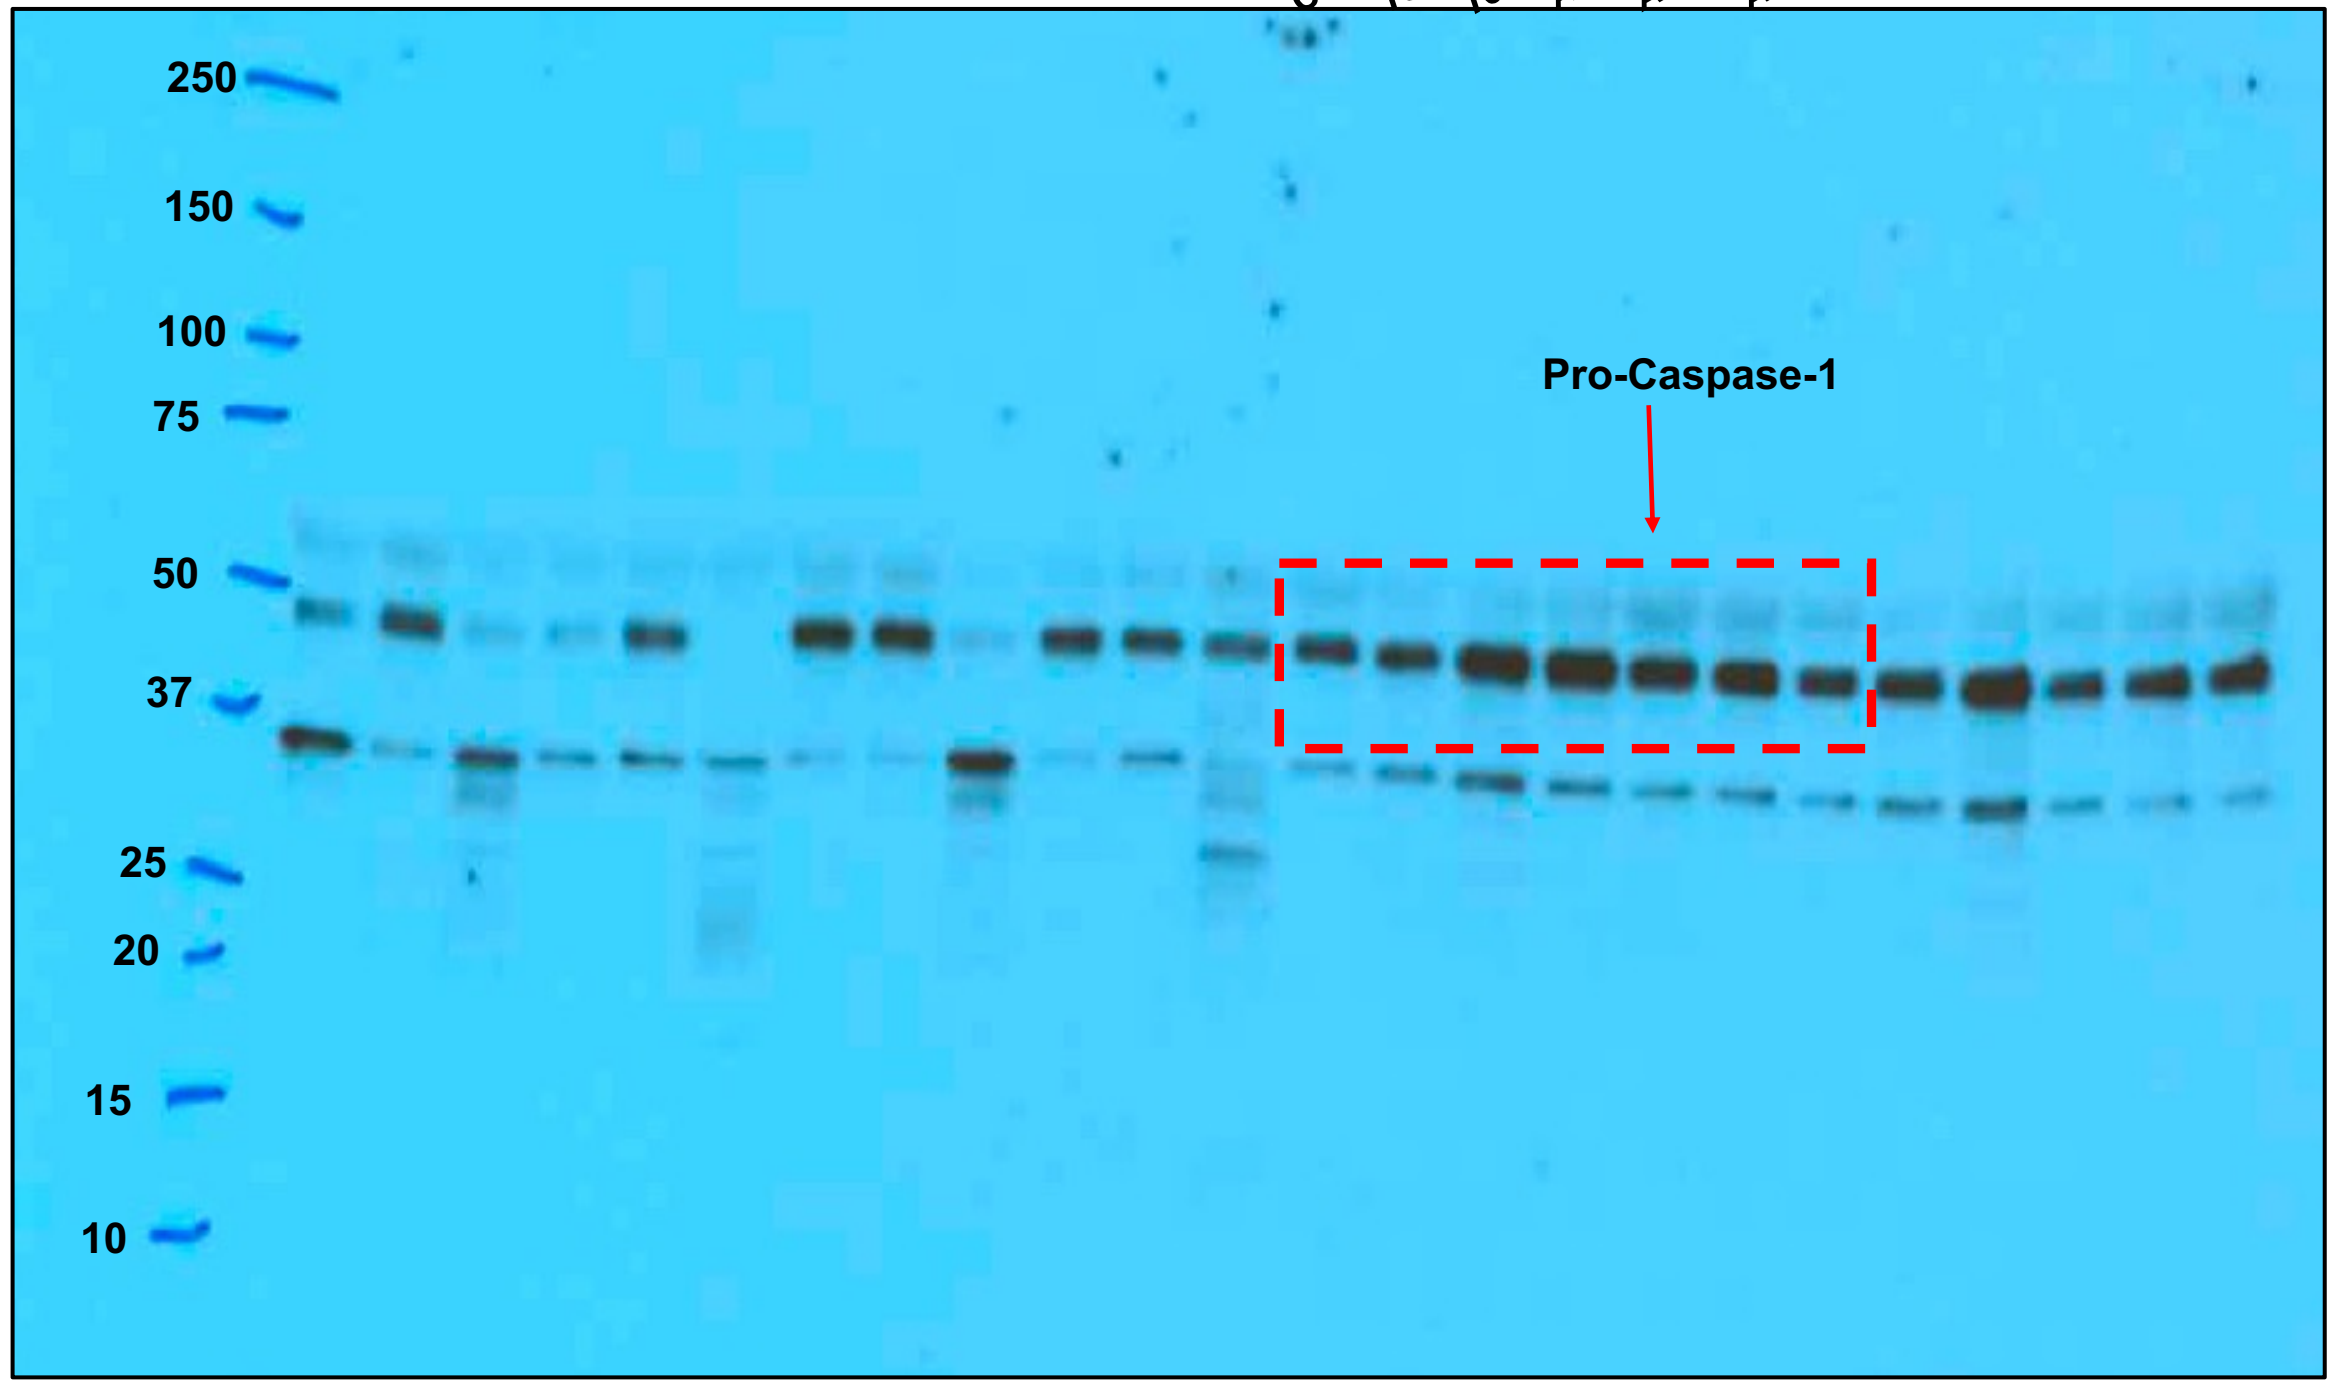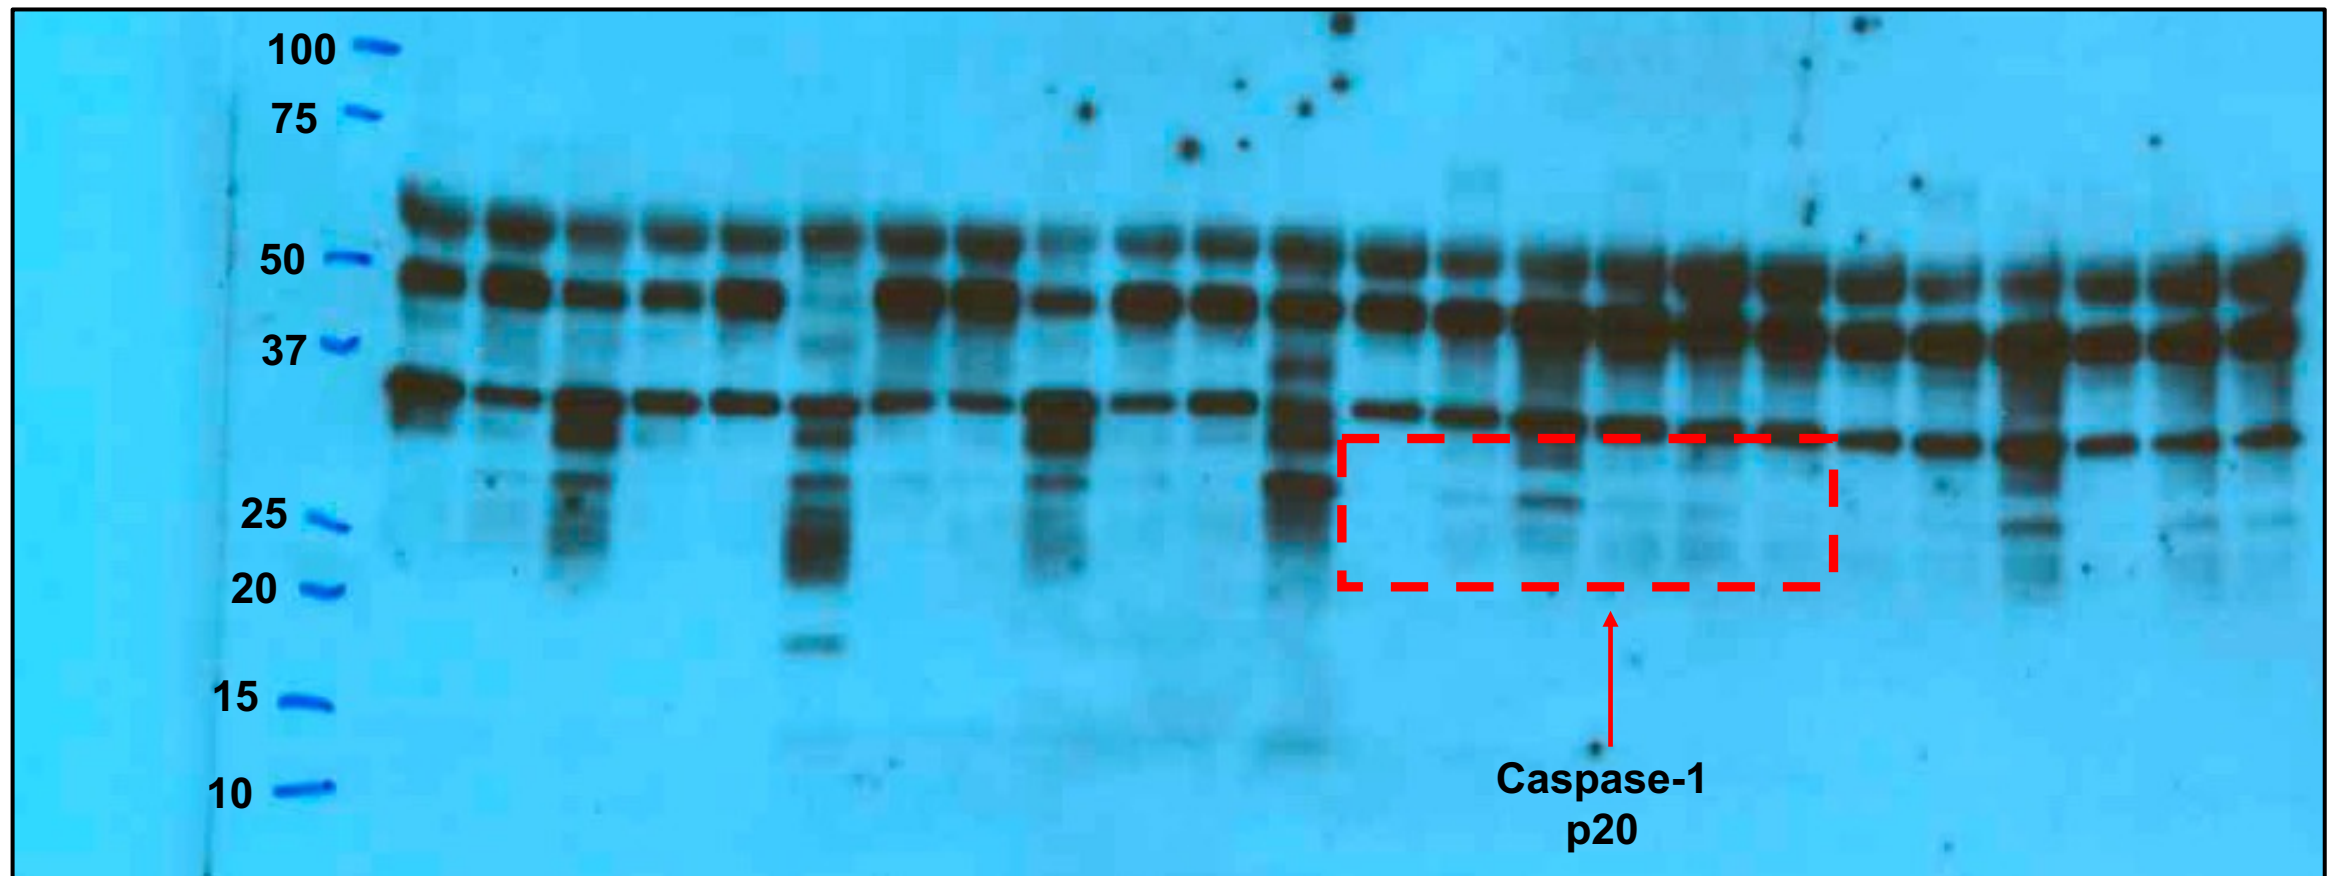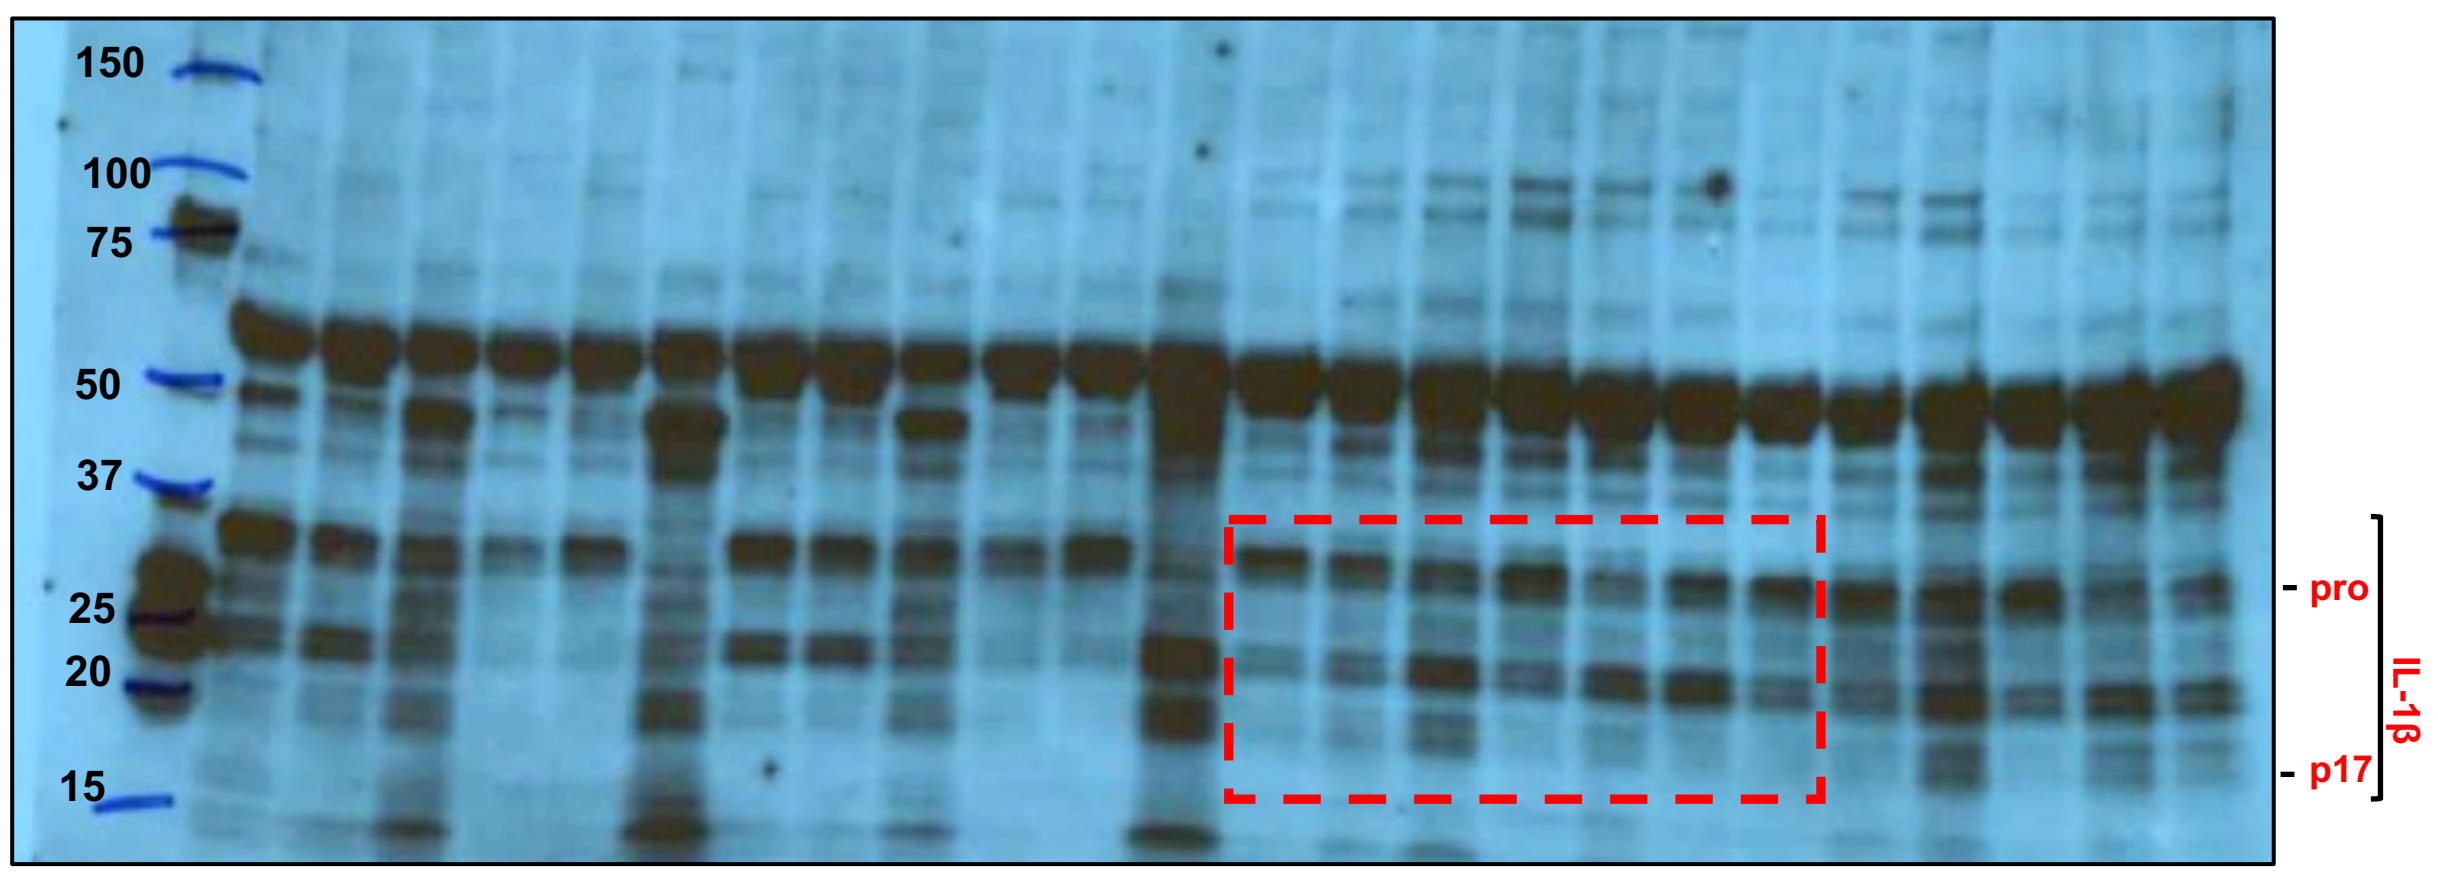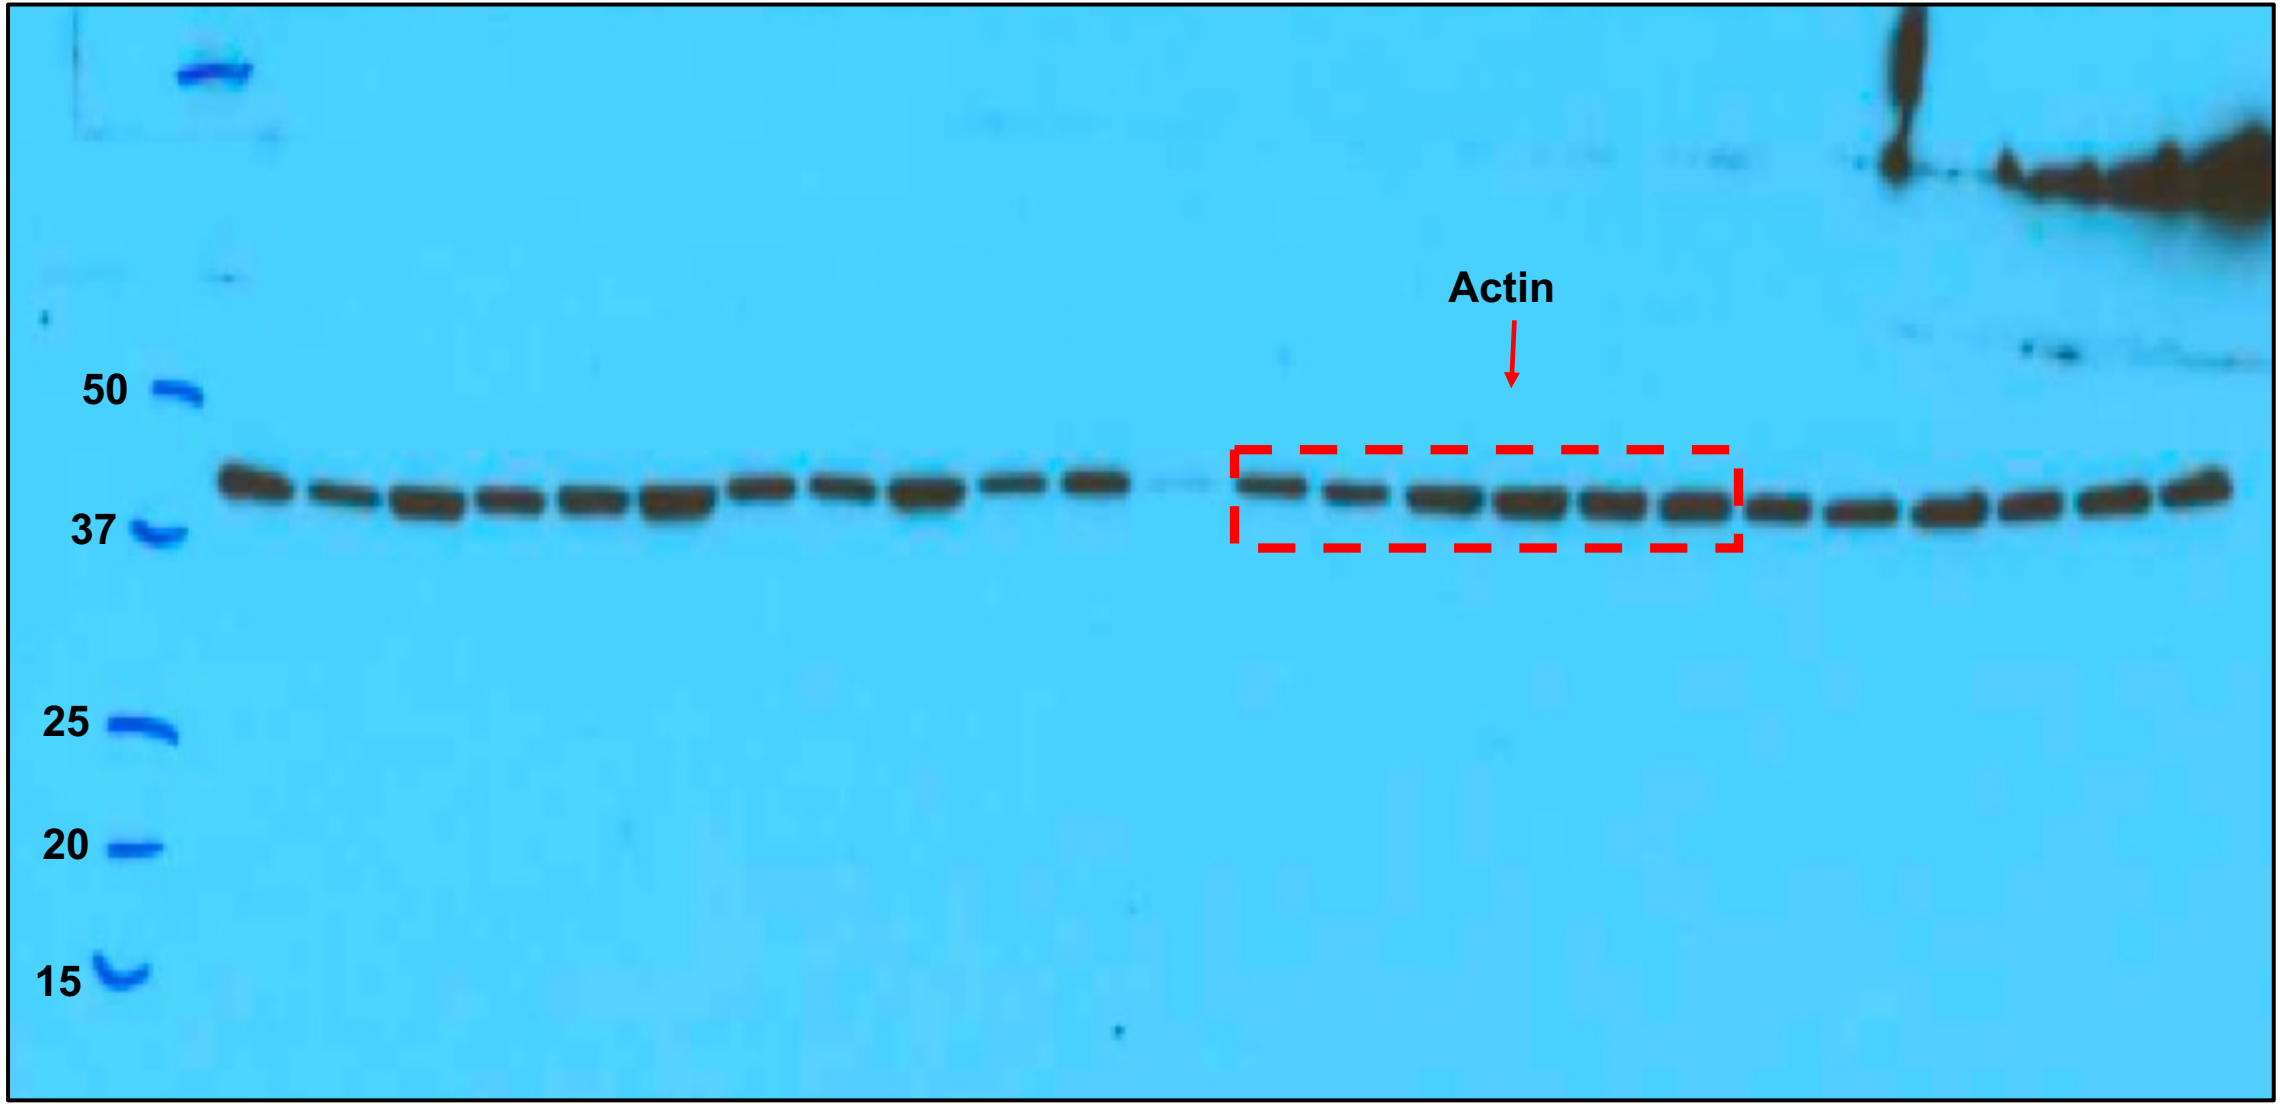

# Full unedited blots for Figure S1

C

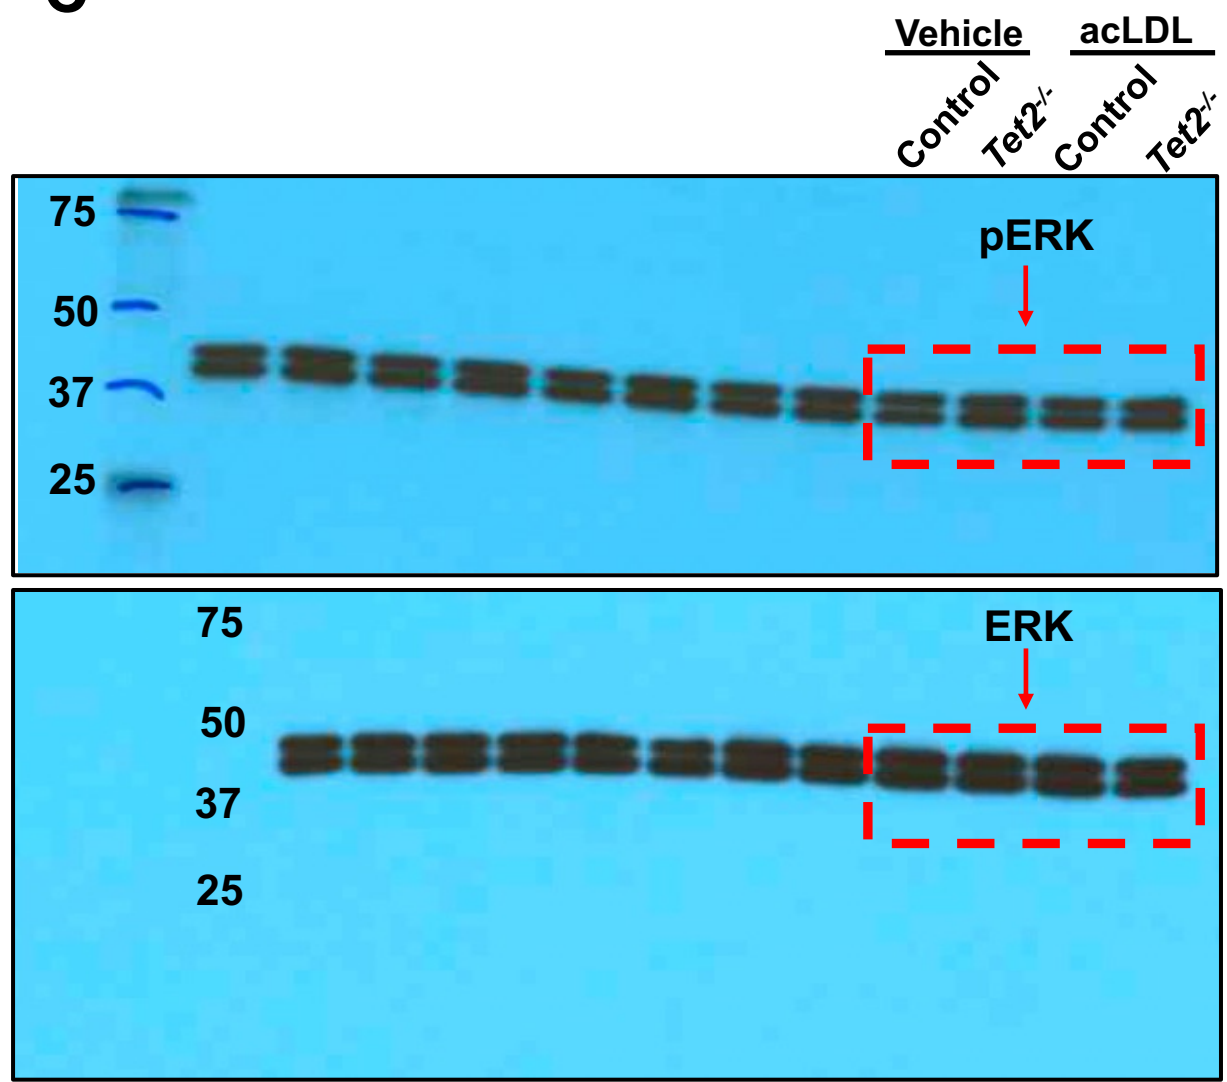

D

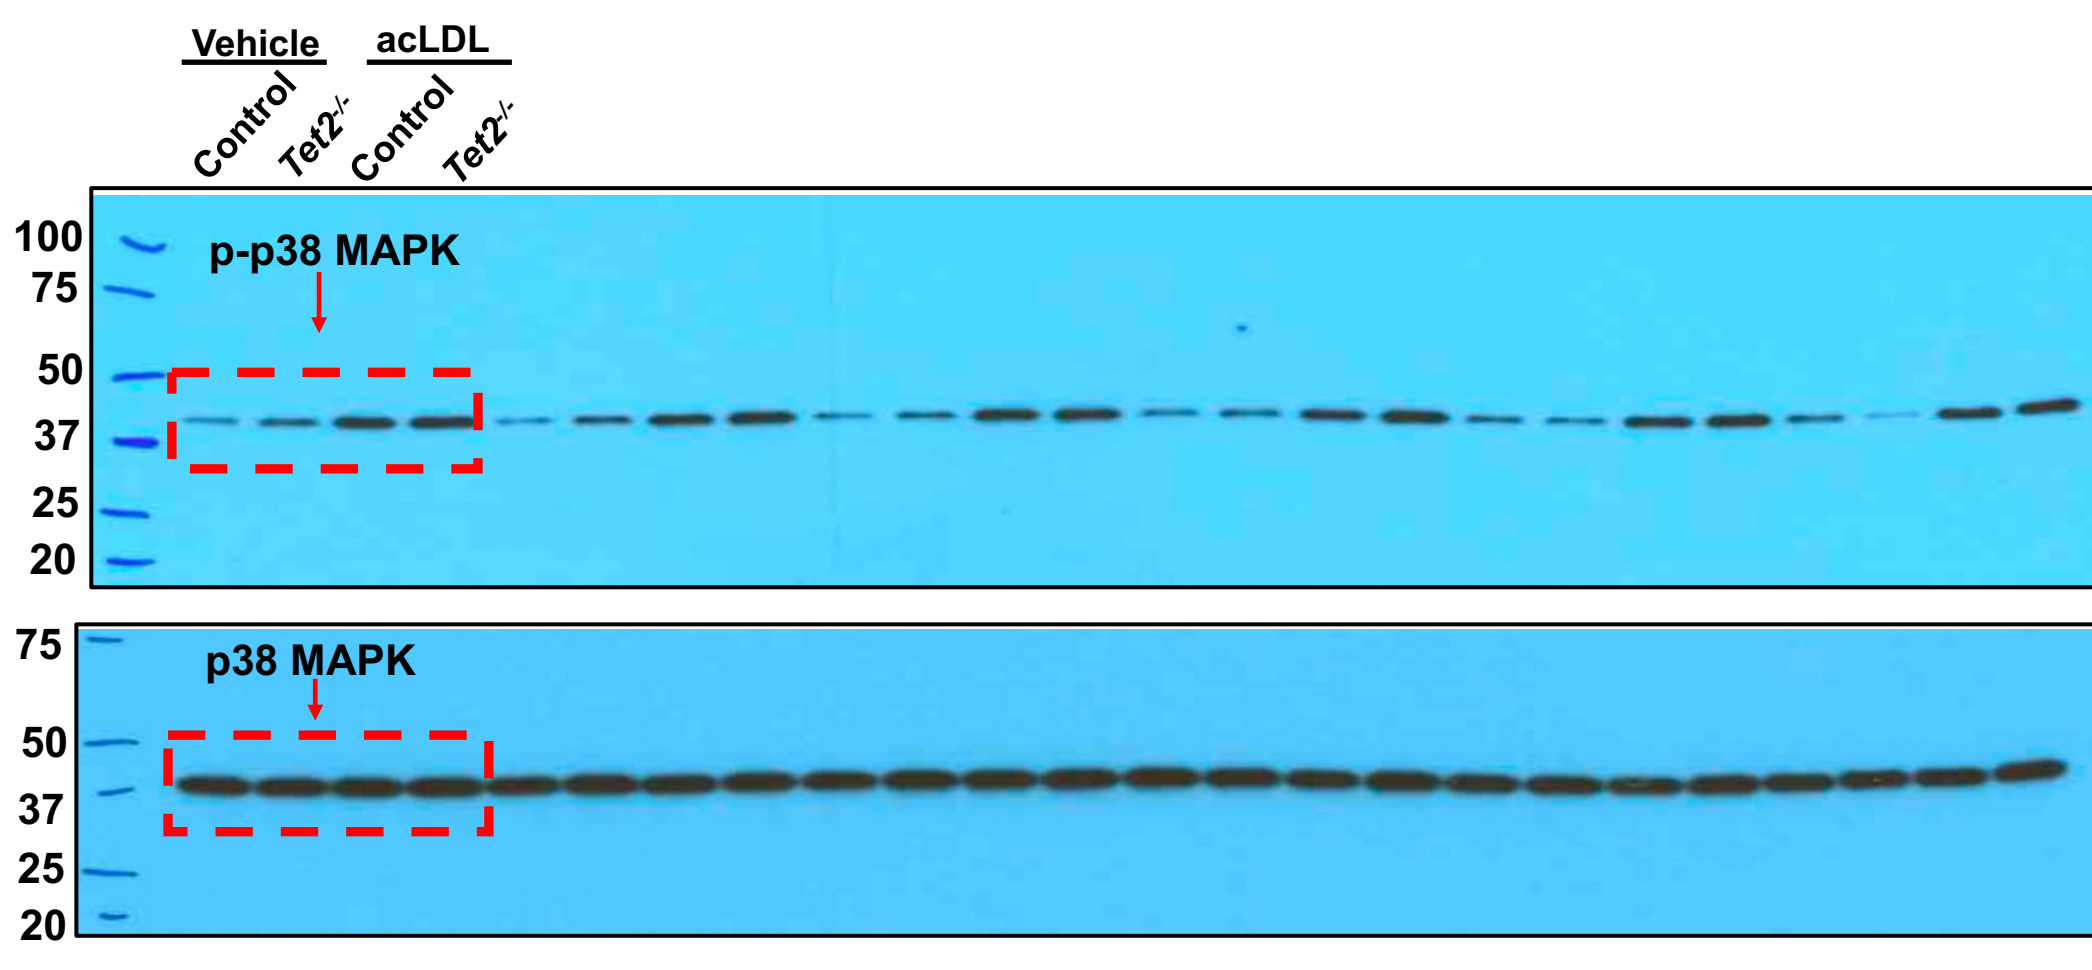

H

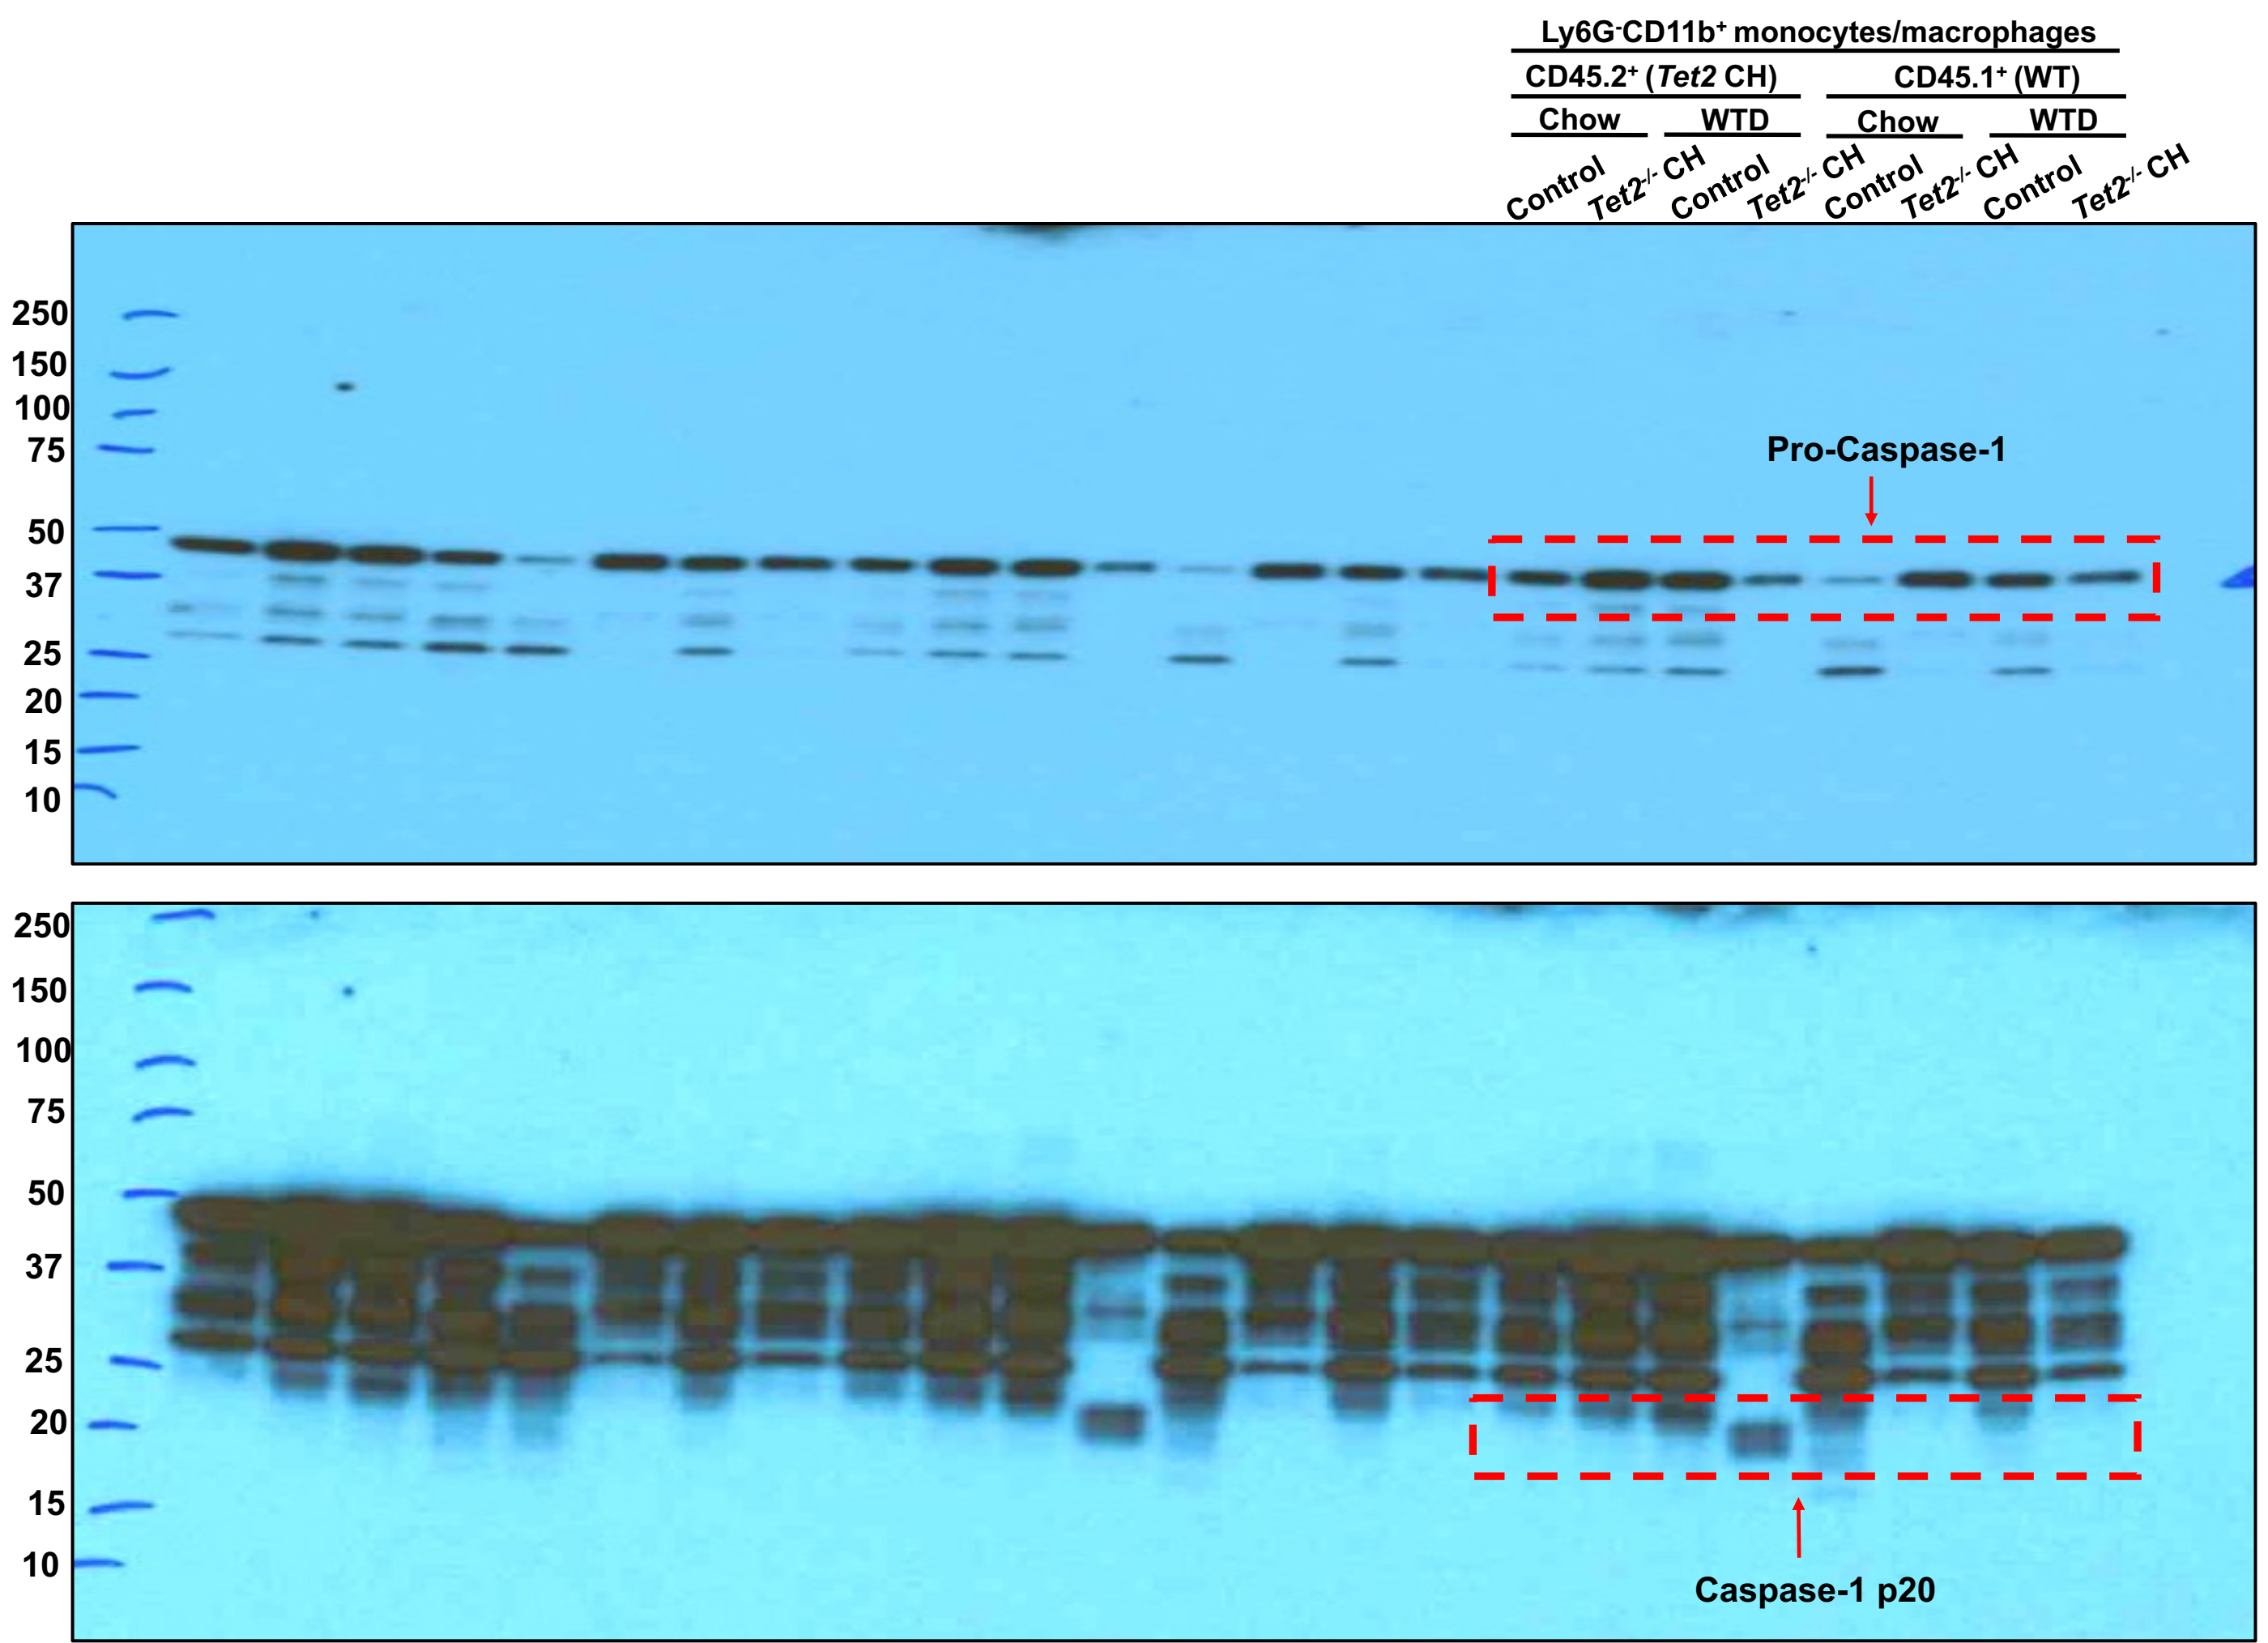

# Full unedited blots for Figure S1

Ly6G-CD11b<sup>+</sup> monocytes/macrophages  
CD45.2<sup>+</sup> (*Tet2* CH)      CD45.1<sup>+</sup> (WT)  
Chow      WTD      Chow      WTD  
Control   *Tet2*<sup>-/-</sup> CH   Control   *Tet2*<sup>-/-</sup> CH   Control   *Tet2*<sup>-/-</sup> CH   Control   *Tet2*<sup>-/-</sup> CH

H

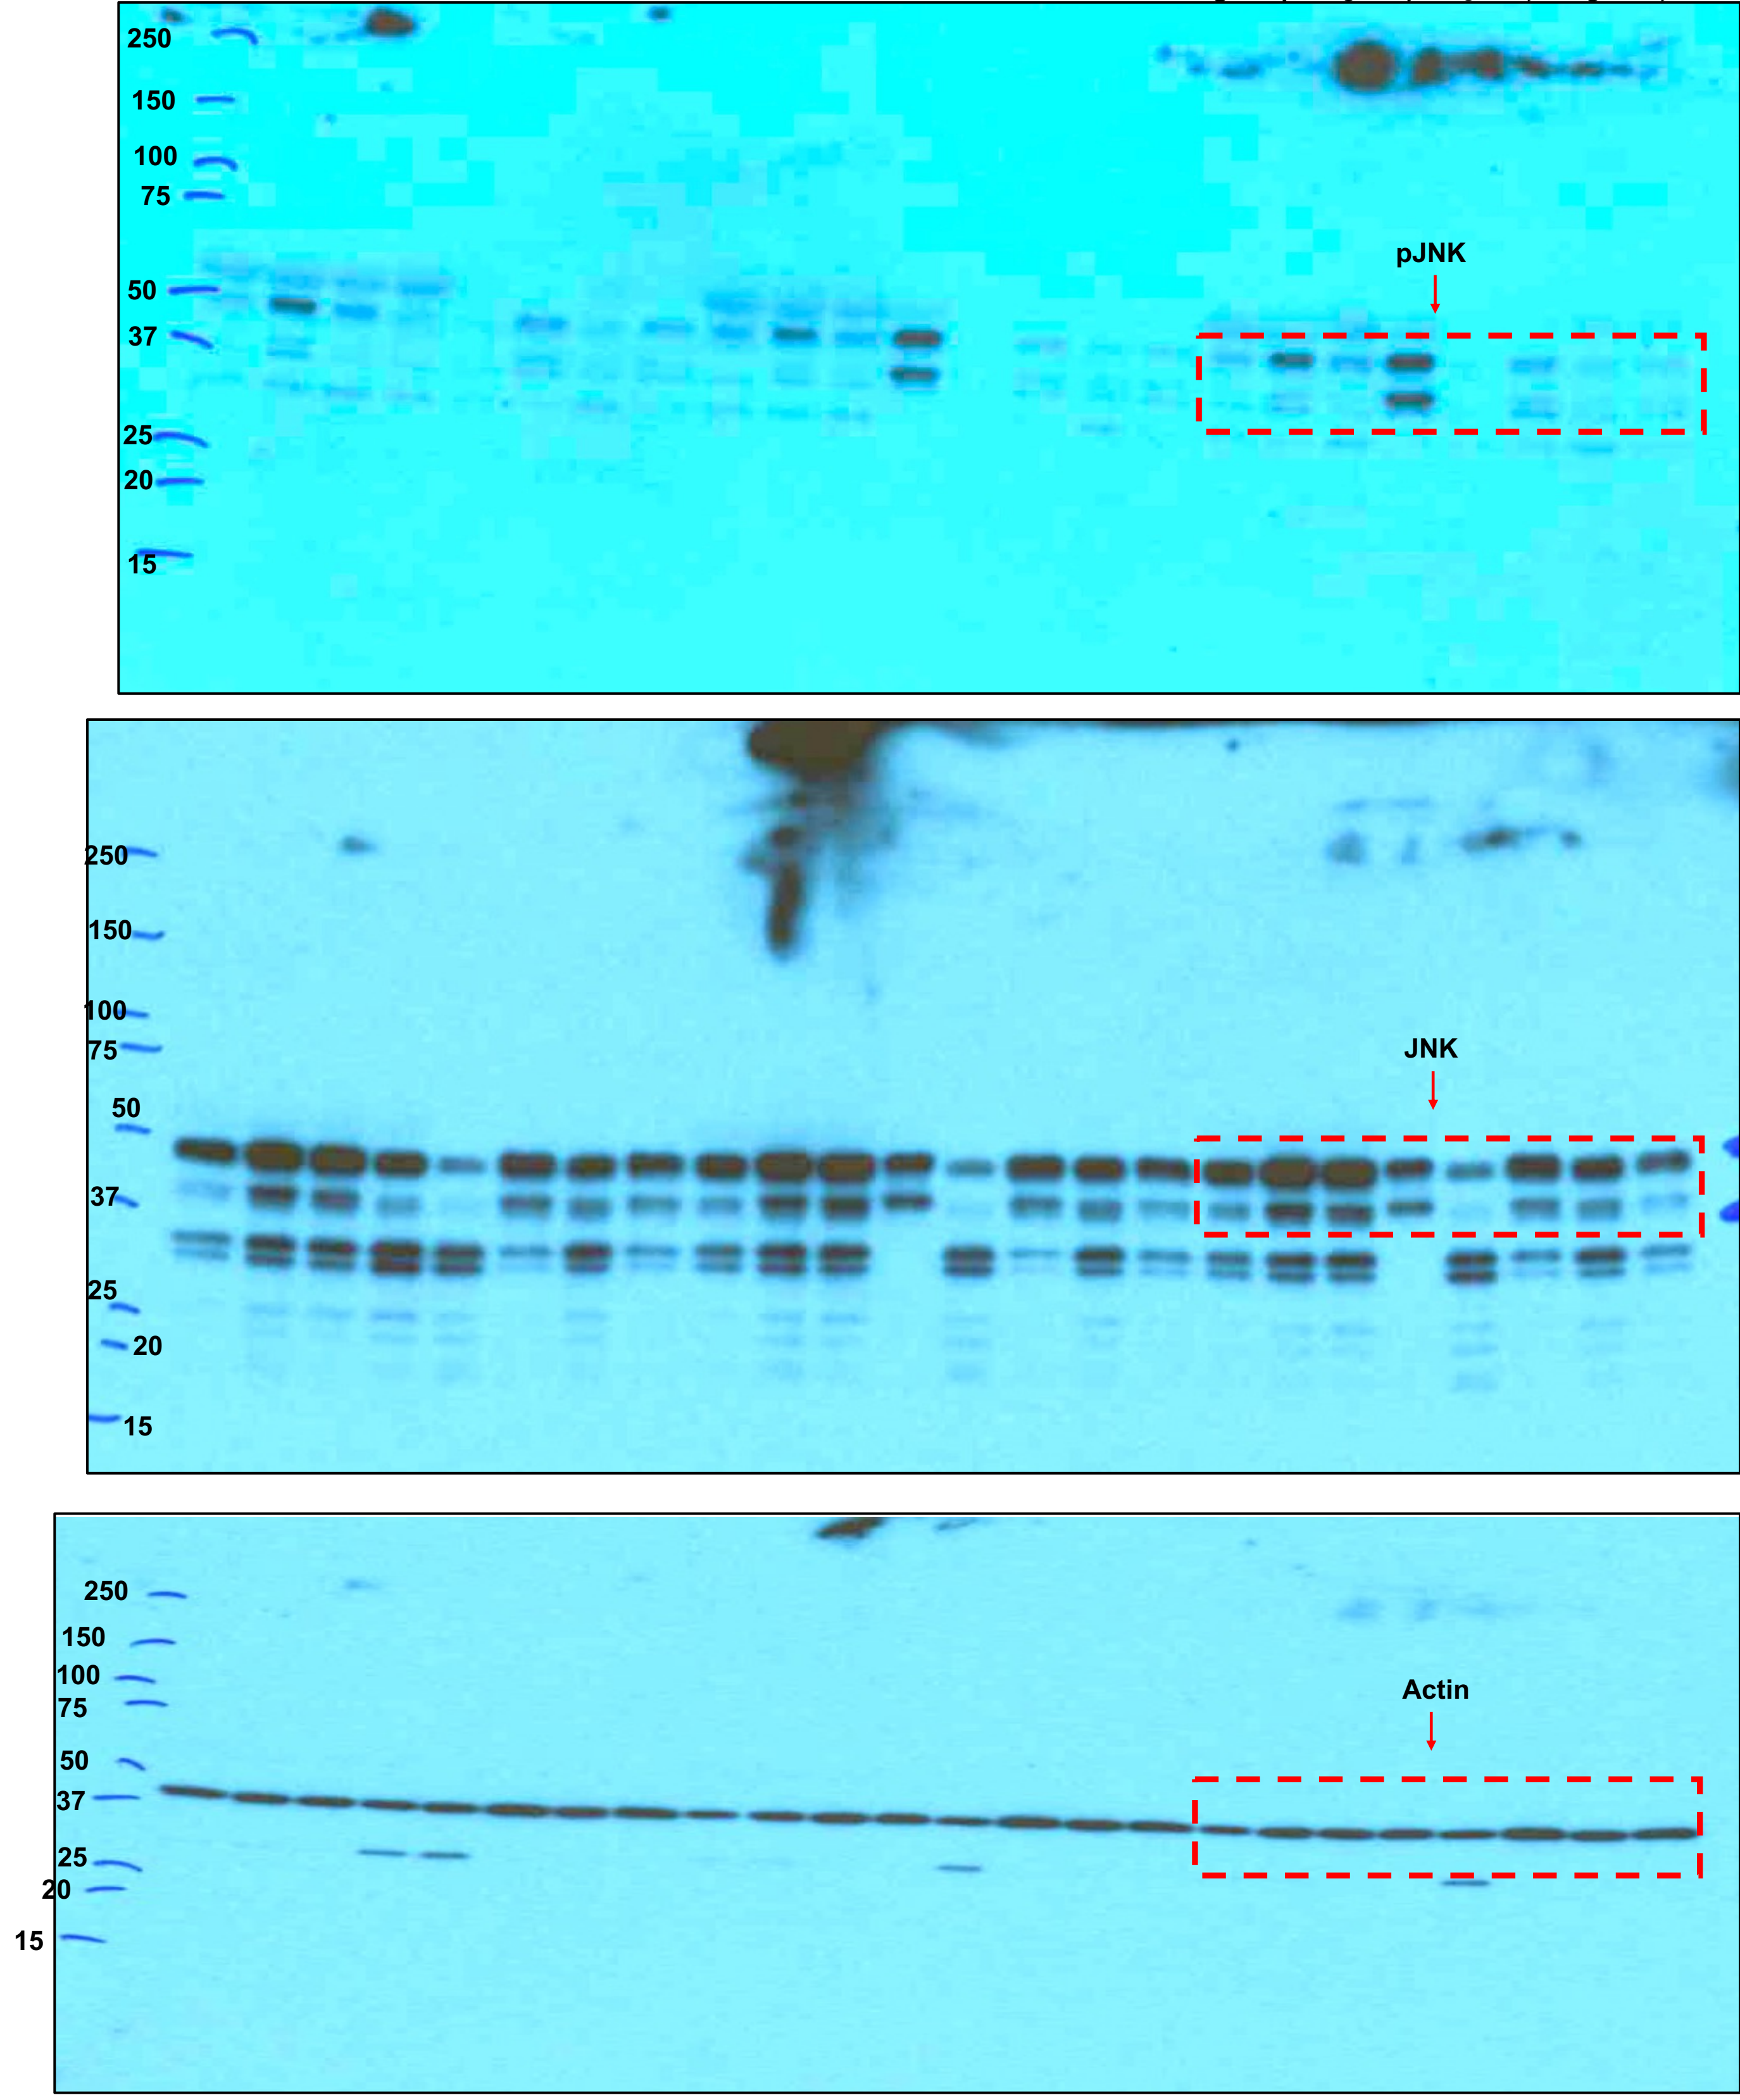

# Full unedited blots for Supplementary S2

C

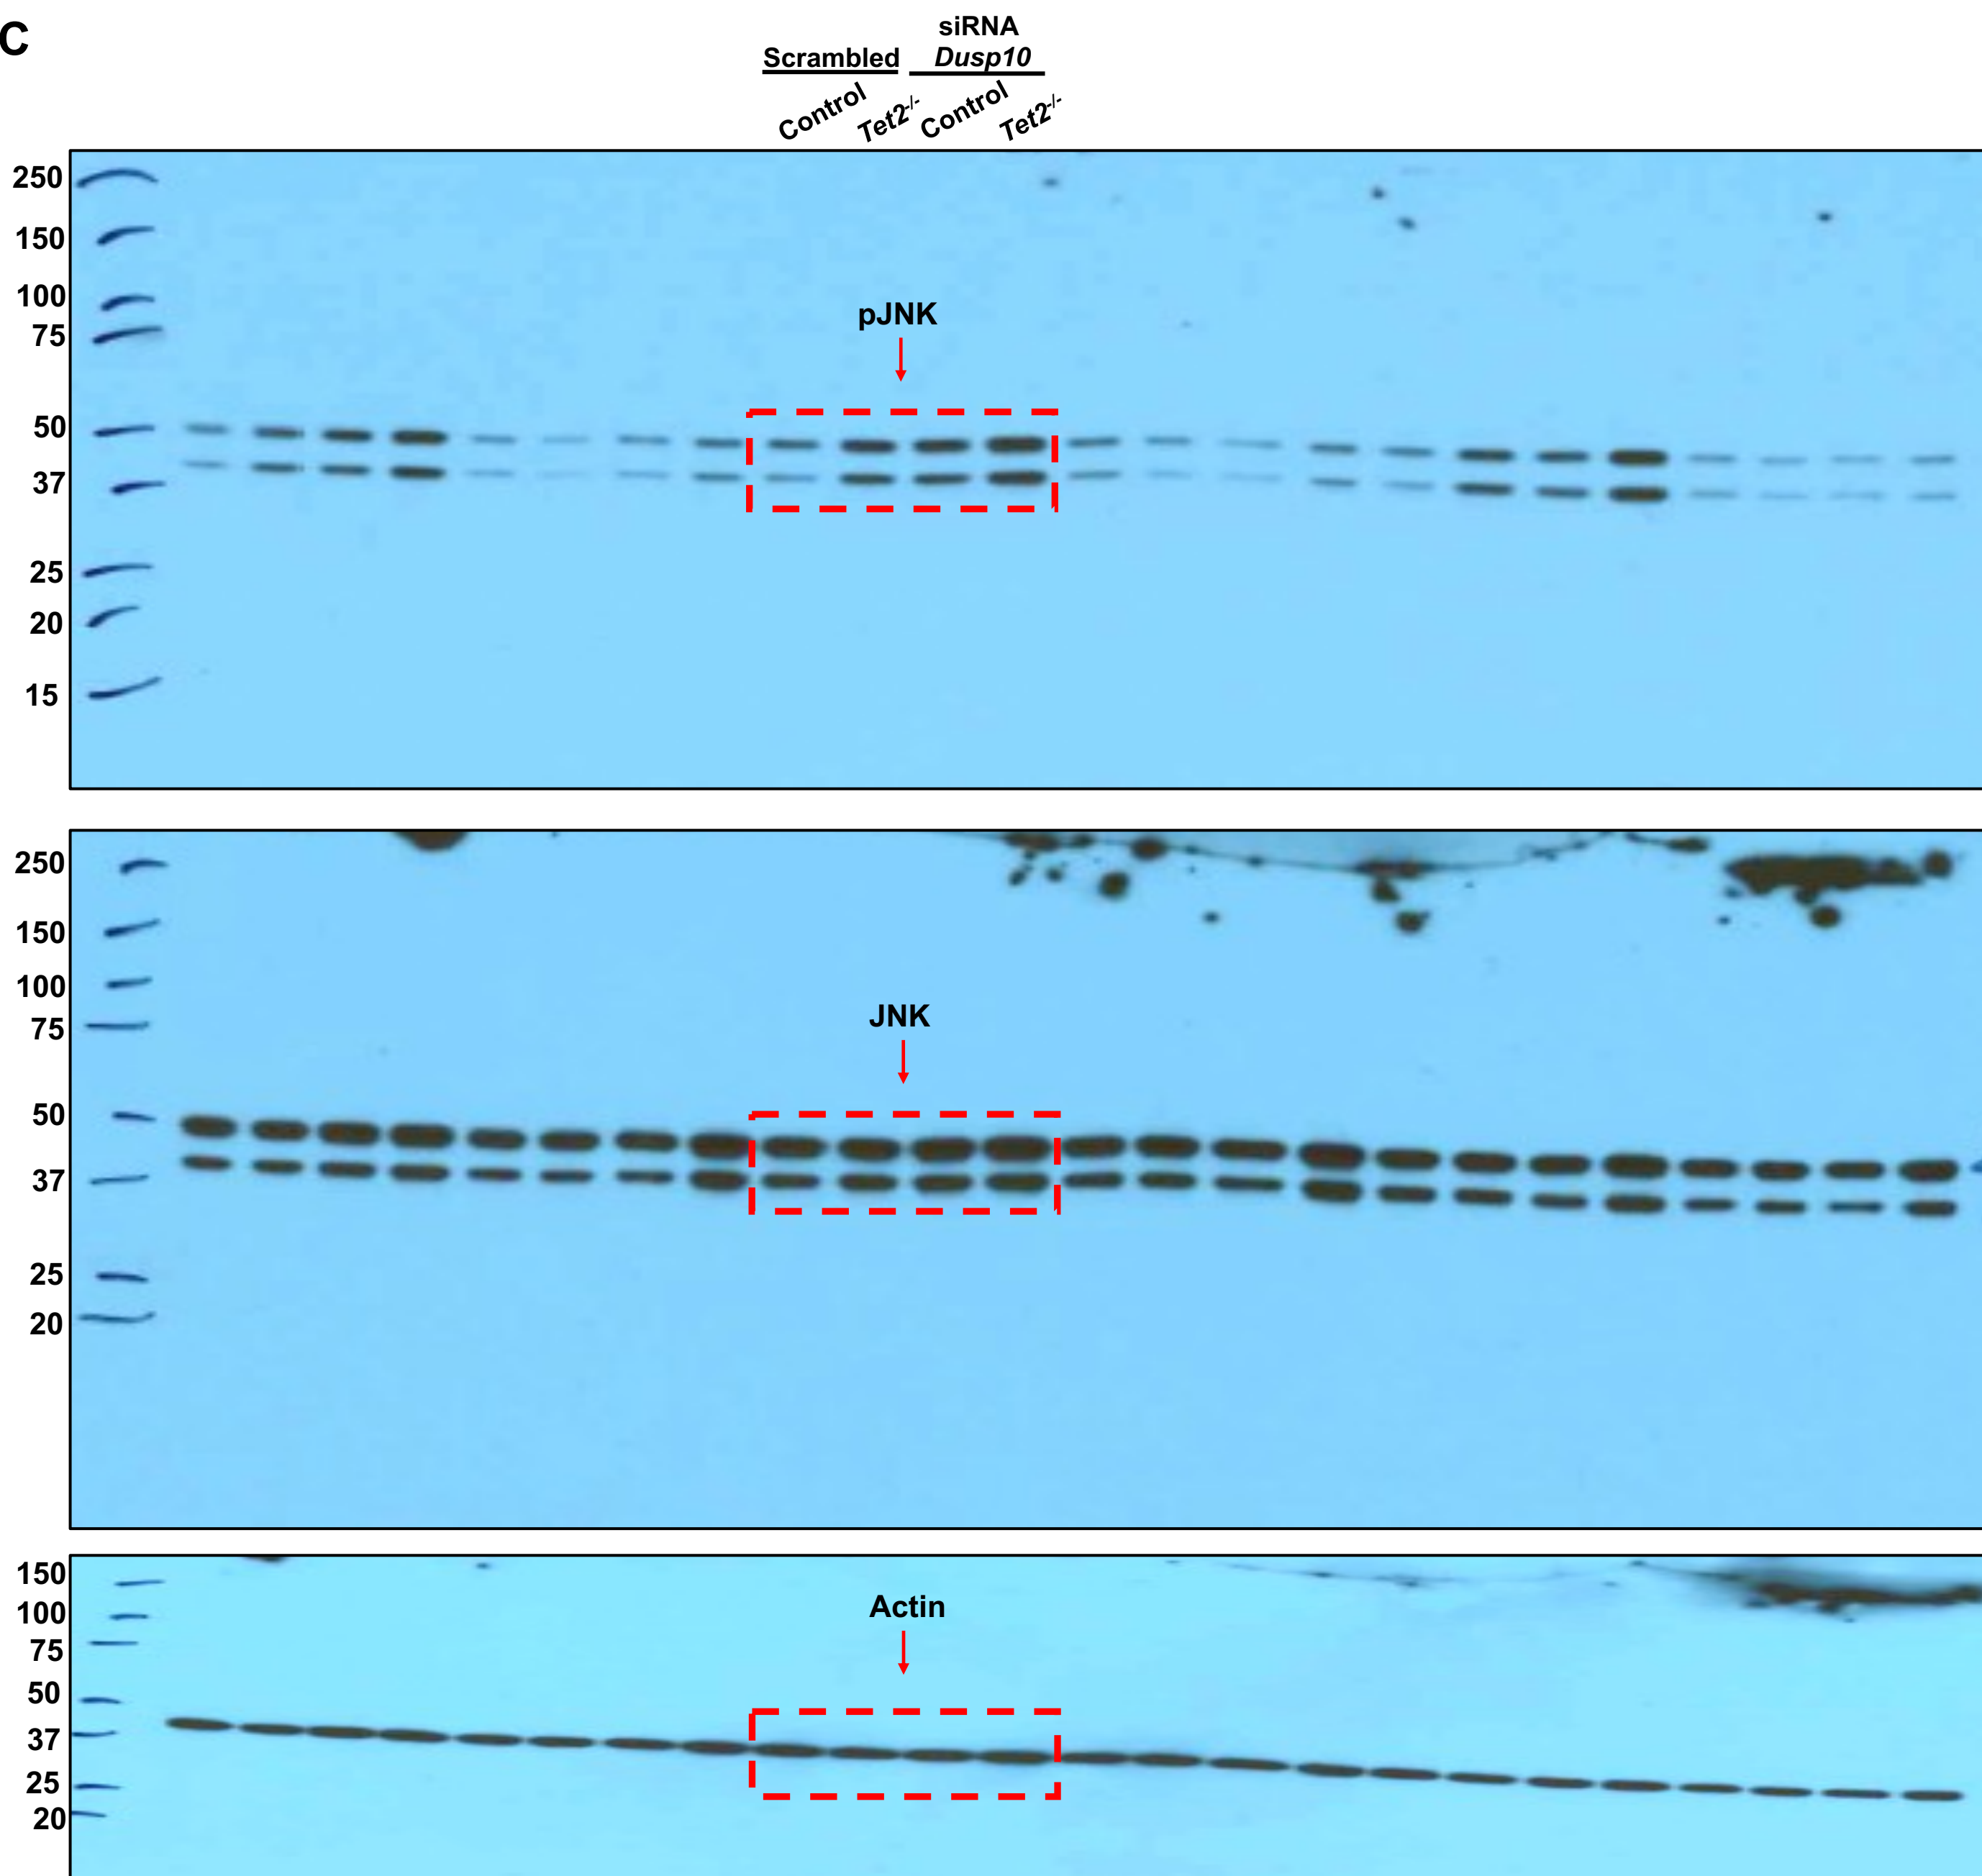

# Full unedited blots for Figure S3

A

Vehicle      acLDL  
Control    Tet2<sup>-/-</sup>    Control    Tet2<sup>-/-</sup>

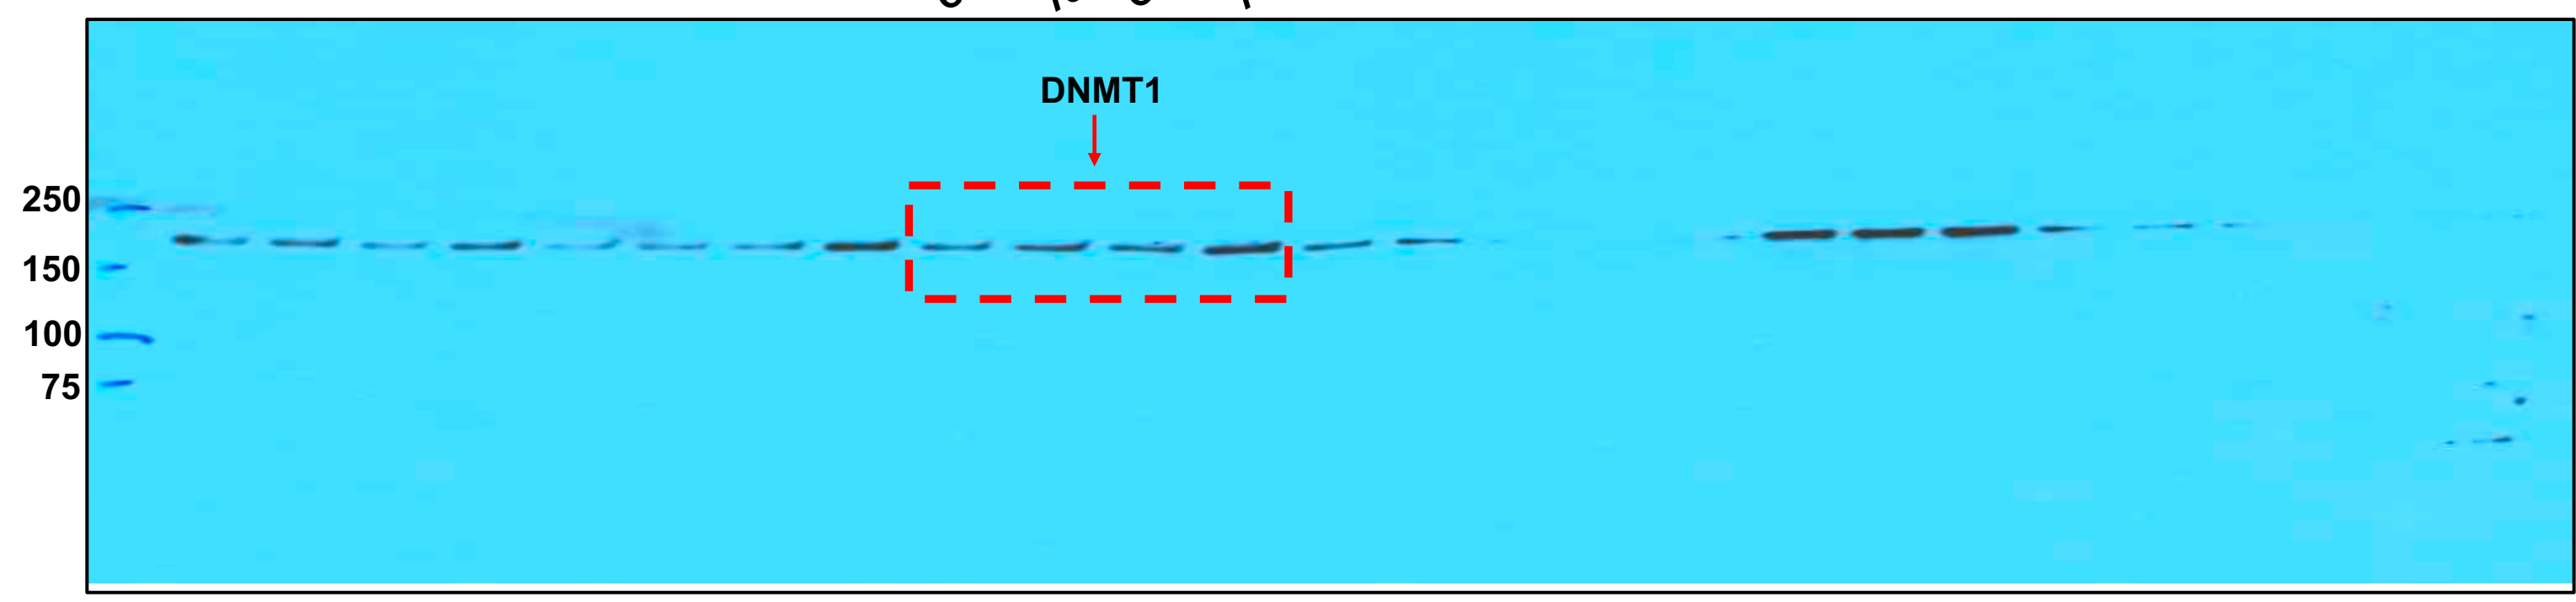

Vehicle      acLDL  
Control    Tet2<sup>-/-</sup>    Control    Tet2<sup>-/-</sup>

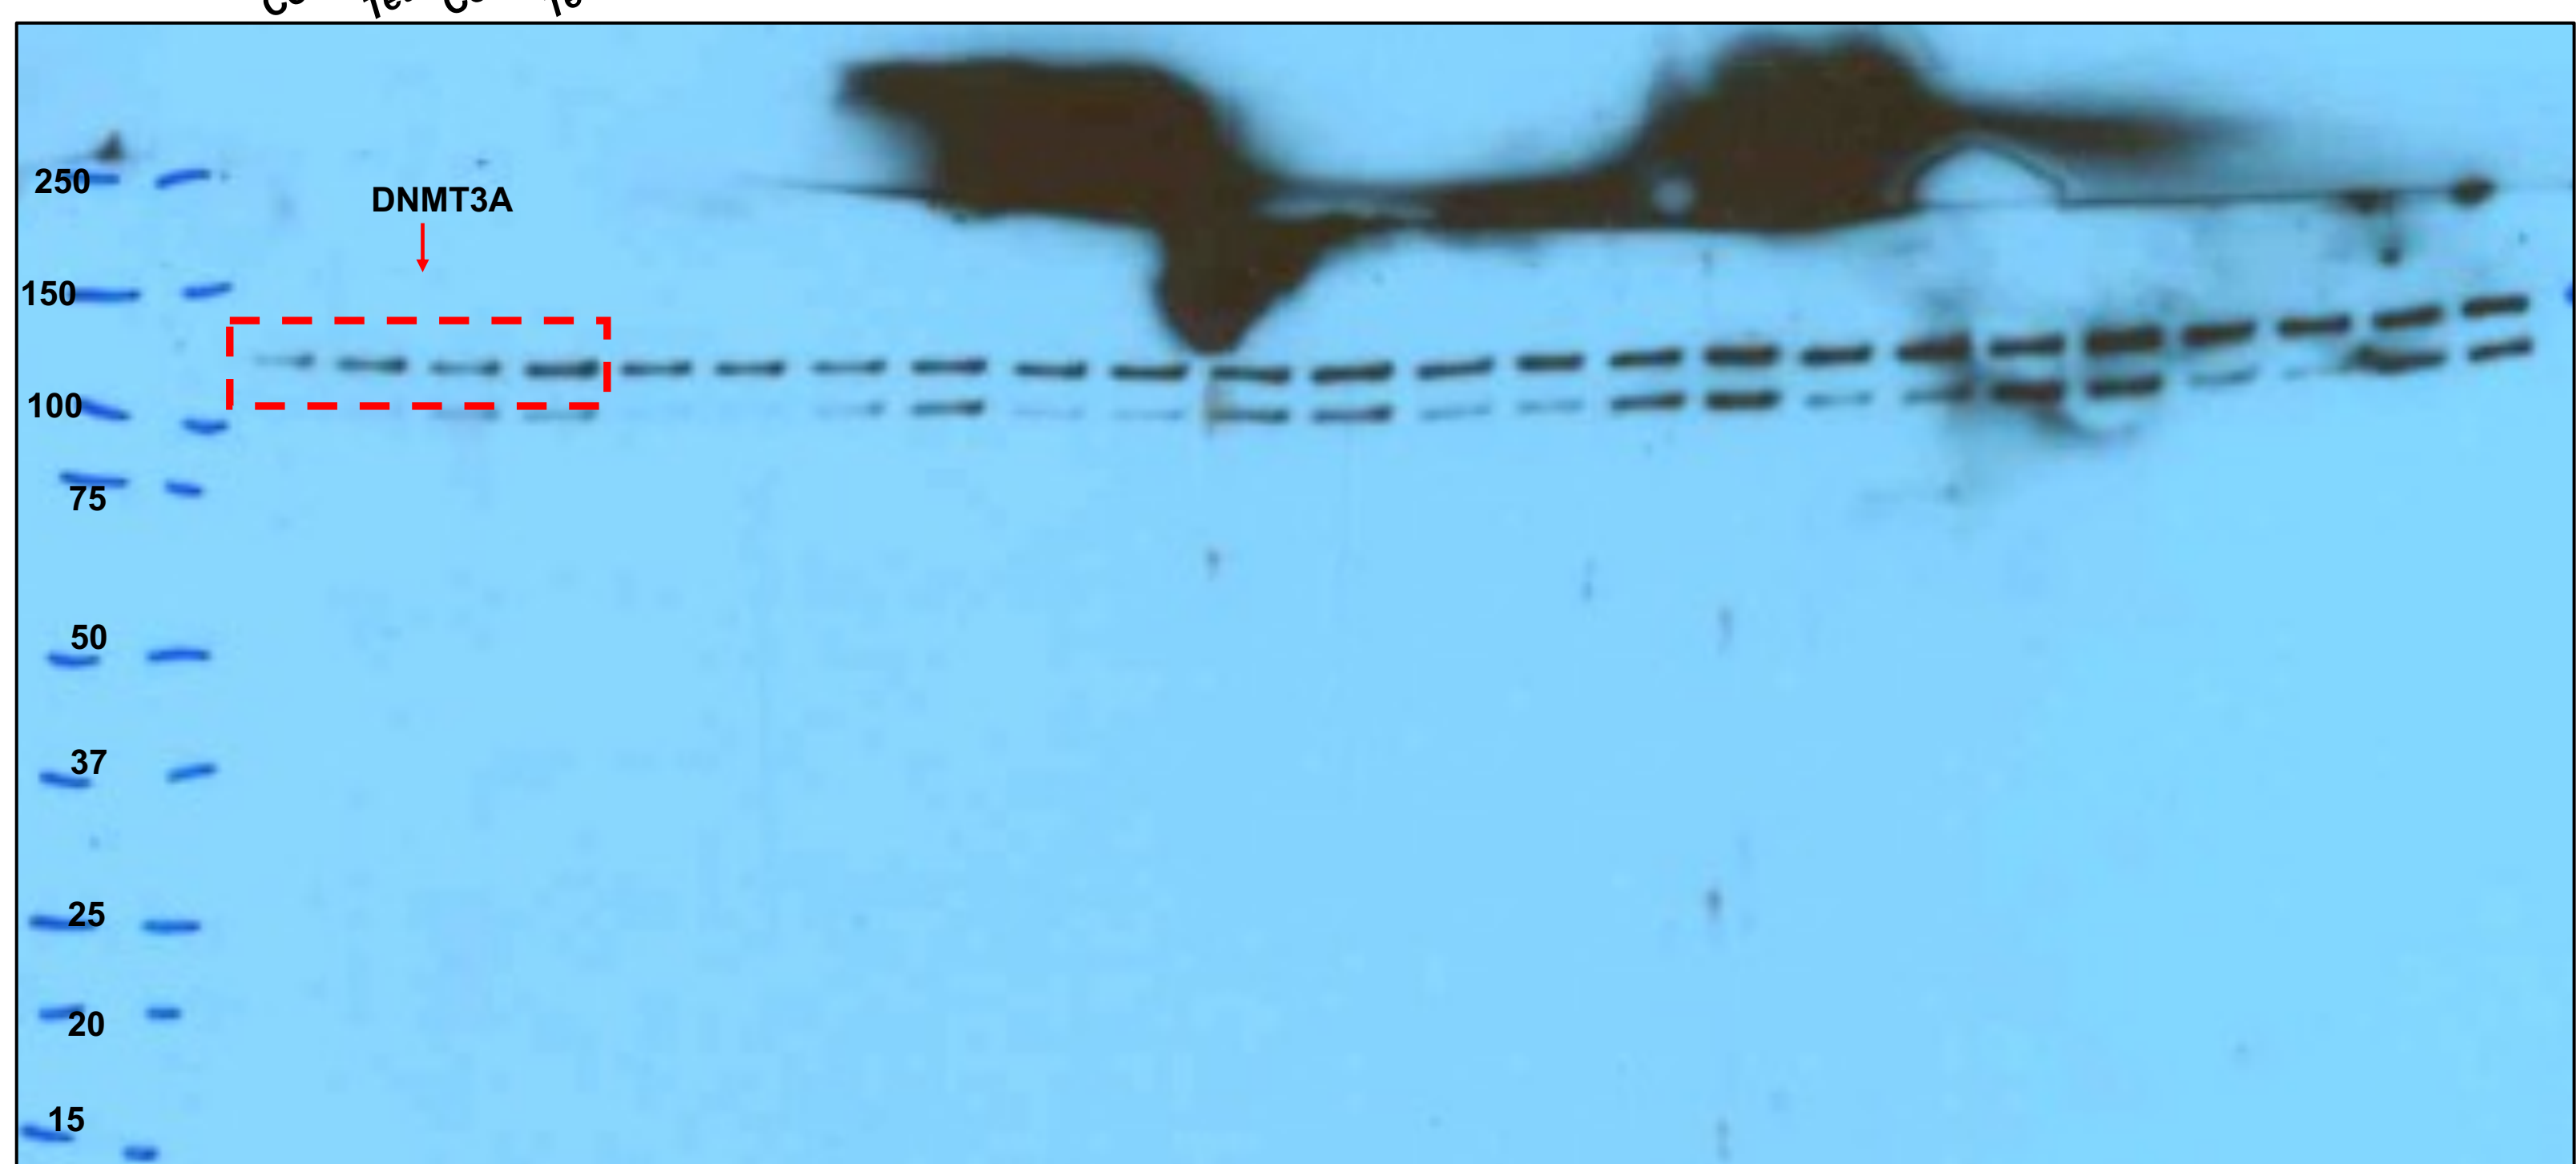

Vehicle      acLDL  
Control    Tet2<sup>-/-</sup>    Control    Tet2<sup>-/-</sup>

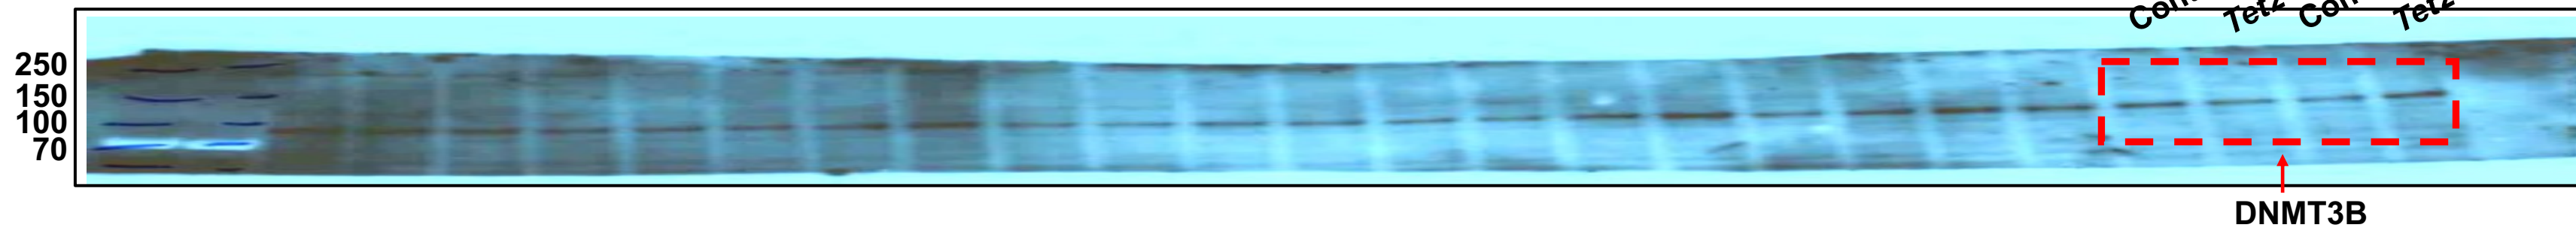

Vehicle      acLDL  
Control    Tet2<sup>-/-</sup>    Control    Tet2<sup>-/-</sup>

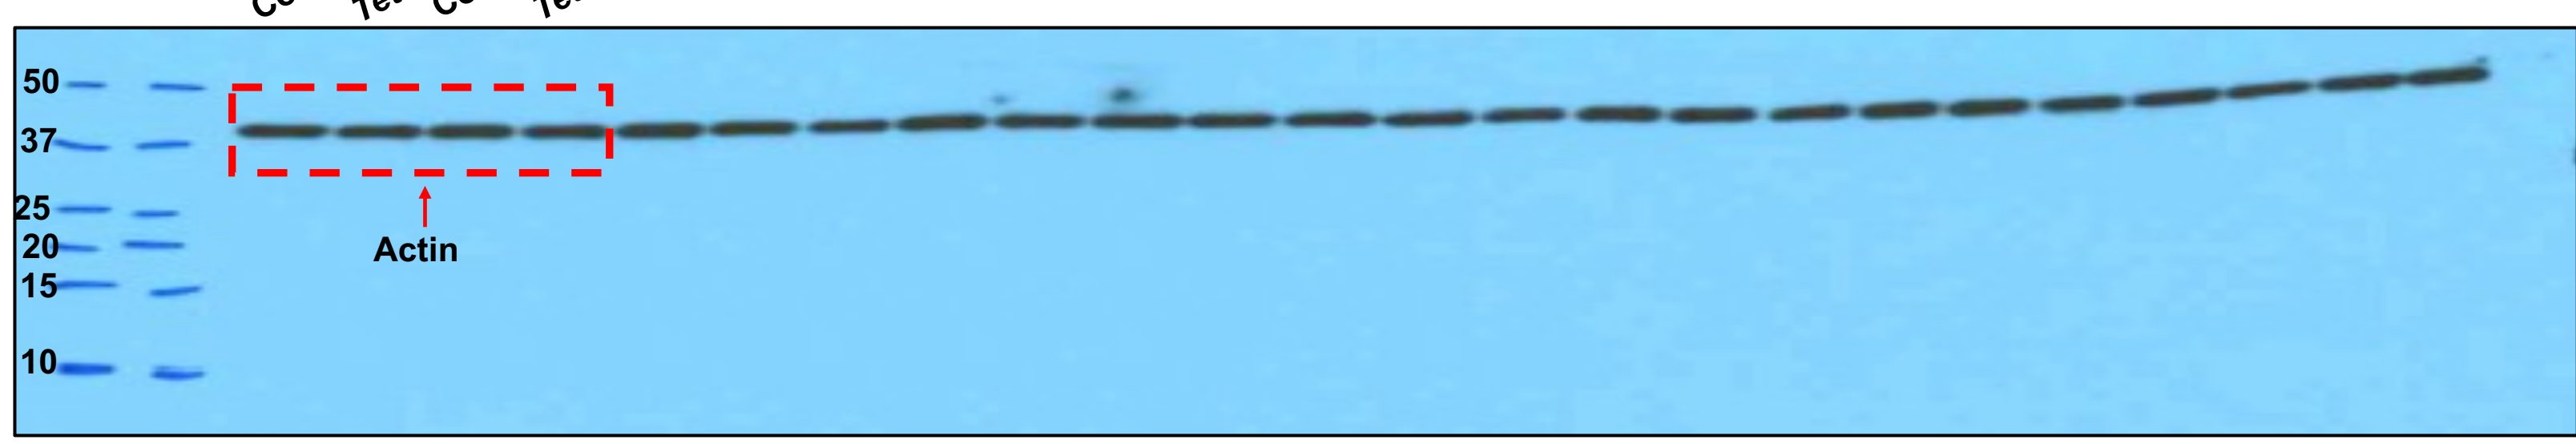

# Full unedited blots for Figure S3

B

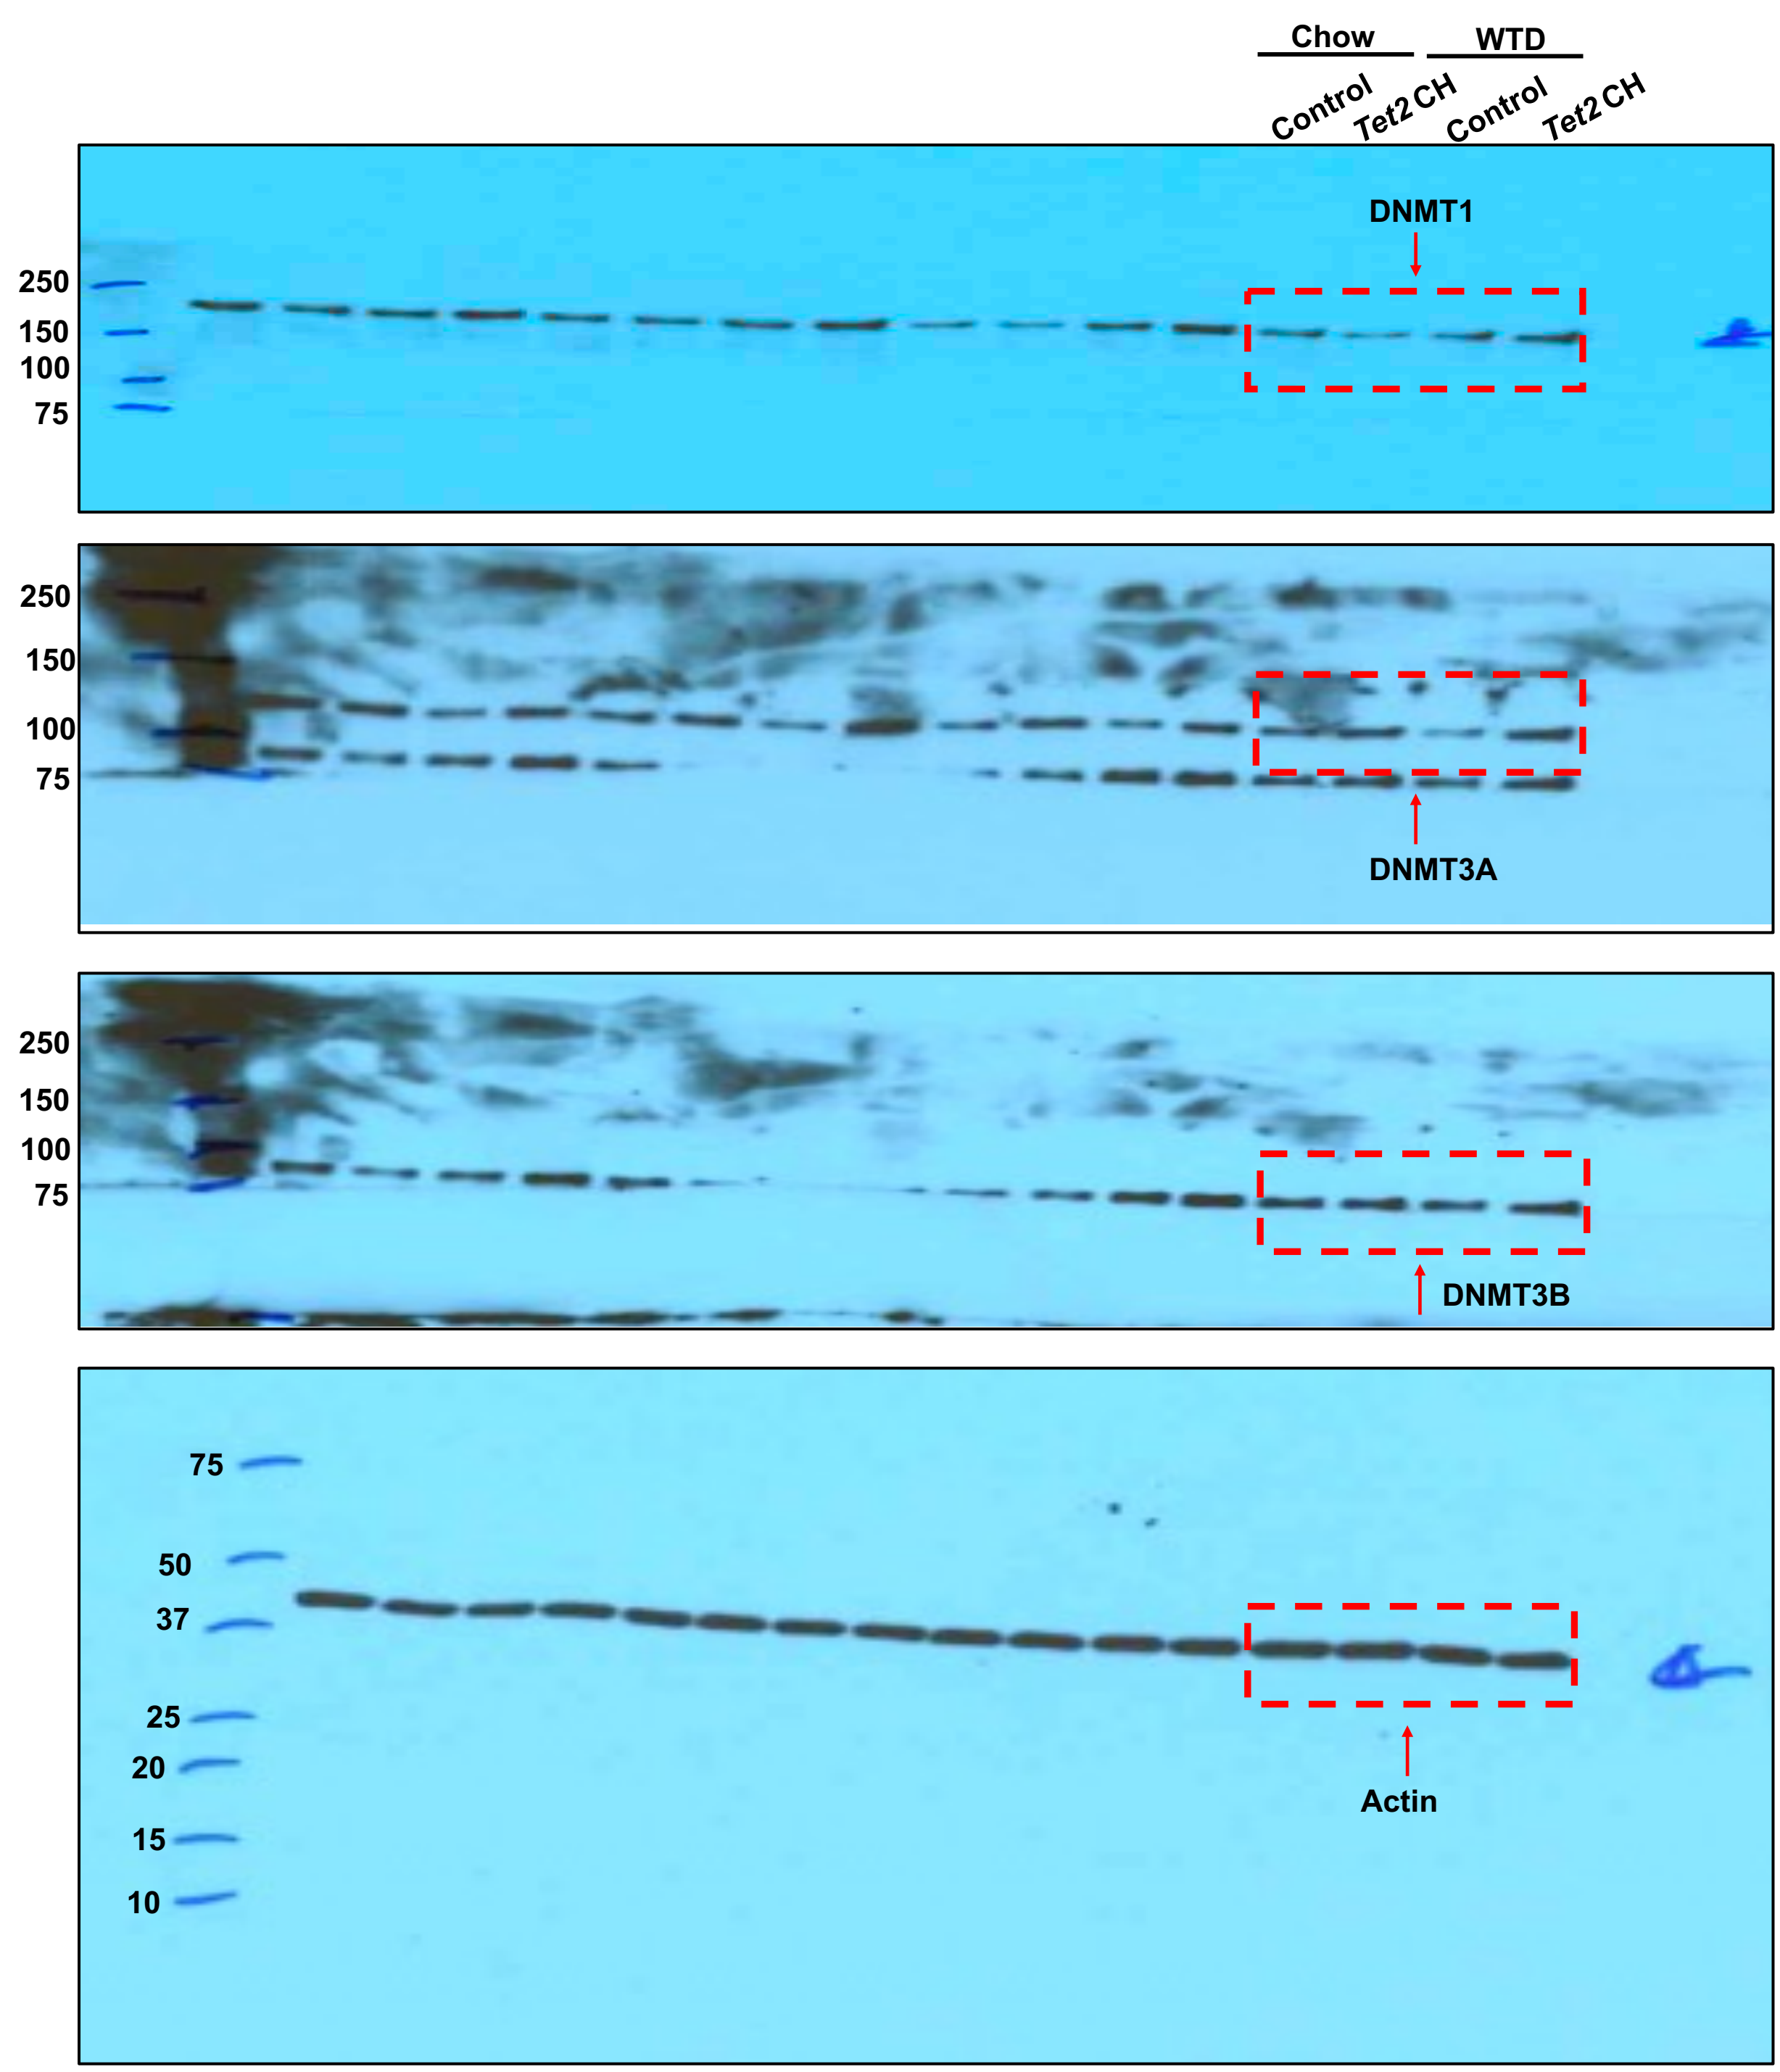

Supplement: NIHMS1931509-supplement-Supplemental_Publication_Material_2.pdf [file NIHMS1931509-supplement-Supplemental_Publication_Material_2.pdf]
